# Supplementary material for: LcSAO1, an Unconventional DOXB Clade 2OGD Enzyme from Ligusticum chuanxiong Catalyzes the Biosynthesis of Plant-Derived Natural Medicine Butylphthalide
Source: Int J Mol Sci. 2023 Dec 13;24(24):17417. doi: 10.3390/ijms242417417 (PMC10743894; doi:10.3390/ijms242417417)
Supplement: Supplementary file 1 [file ijms-24-17417-s001.zip › Supplementary Table.xlsx]

## Sheet: Table S1
Table S1. Summary of sequencing quality
Sample	Raw reads	Clean reads	Clean bases(G)	Valid Rate(%)	Q30(%)	GC(%)
CX-LA	21318457	21148156	6.34	0.03	94.13	42.38
CX-LB	23241404	22953275	6.89	0.03	94.22	42.48
CX-LC	28114591	27854689	8.36	0.03	94.37	42.72
CX-RA	20640612	20440242	6.13	0.03	94.47	42.21
CX-RB	21680031	21451359	6.44	0.03	94.34	42.33
CX-RC	21421341	21048721	6.31	0.02	94.41	43.11
CX-SA	21897841	21645561	6.49	0.03	94.3	41.94
CX-SB	21675623	21514220	6.45	0.03	94.31	42.41
CX-SC	21753165	21568966	6.47	0.03	94.19	42.34

## Sheet: Table S2
Table S2. Trinity assembly result statistic
Trinity contigs number	392621
Unigene contigs number	197194
Trinity N50	1951
Unigene N50	1166
Trinity max contig length	17184
Unigene max contig length	17184
Trinity min contig length	178
Unigene min contig length	201
Trinity average contig length	1102.25
Unigene average contig length	731.32
GC content	38.18
Trinity BUSCO	95.3%(S:19.2%,D:76.1%)
Unigen BUSCO	86.9%(S:83.3%,D:3.6%)

## Sheet: Table S3
Table S3. Unigene annotations statistic
Total	91968
NR	88911
SwissProt	53395
Daucus_carota	77780
GO	40062
KEGG	34135
pfam	35935

## Sheet: Table S4
Table S4. Content of butylphthalide in three tissues of L. chuanxiong
Tissue	Butylphthalide （ng/g)
Rhizome-A	213362
Rhizome-B	295898
Rhizome-C	262396
Stem-A	38480.2
Stem-B	44898.5
Stem-C	43191.2
Leaf-A	105410
Leaf-B	149049
Leaf-C	121348

## Sheet: Table S5
Table S5. Rhizome up-regulated gene expression table
transcript_id	CX-LA	CX-LB	CX-LC	CX-RA	CX-RB	CX-RC	CX-SA	CX-SB	CX-SC
TRINITY_DN7285_c0_g1_i1.p1	143	268	289	1127	1436	1530	336	264	282
TRINITY_DN2759_c0_g1_i15.p2	12	16	15	114	198	90	57	29	44
TRINITY_DN17627_c0_g1_i5.p1	0	1	0	188	55	69	11	14	2
TRINITY_DN43257_c0_g1_i1.p1	0	0	0	24	12	17	0	0	0
TRINITY_DN494_c0_g1_i3.p2	22	423	75	2223	3312	866	130	194	448
TRINITY_DN394_c0_g1_i2.p1	603	642	837	2862	1971	1253	767	1137	1058
TRINITY_DN1370_c0_g1_i6.p1	2	10	6	215	423	191	93	21	11
TRINITY_DN1370_c0_g1_i6.p2	3	13	7	228	432	208	98	23	12
TRINITY_DN1370_c0_g1_i6.p3	3	16	8	341	576	232	119	26	13
TRINITY_DN494_c0_g1_i7.p1	14	325	62	1574	2536	568	90	160	384
TRINITY_DN3914_c0_g1_i7.p1	42	56	58	520	1007	361	192	201	293
TRINITY_DN5682_c0_g2_i3.p2	200	468	361	1407	1375	1574	783	660	645
TRINITY_DN28202_c0_g2_i1.p1	0	11	54	437	337	214	132	206	162
TRINITY_DN220_c0_g2_i18.p1	1046	1104	940	21858	42193	27611	5516	2371	4188
TRINITY_DN11817_c0_g1_i2.p1	60	41	93	2231	2282	1260	35	34	55
TRINITY_DN1094_c0_g3_i3.p1	44	34	53	219	319	121	69	66	74
TRINITY_DN1325_c0_g1_i9.p1	213	140	194	601	1213	503	378	215	304
TRINITY_DN8883_c0_g3_i3.p1	303	257	395	893	1185	390	172	382	227
TRINITY_DN13647_c0_g1_i4.p1	0	0	0	293	91	106	0	0	0
TRINITY_DN1626_c0_g1_i5.p1	352	330	245	1750	1464	1220	529	841	605
TRINITY_DN3307_c0_g1_i4.p1	159	74	53	910	419	380	174	230	91
TRINITY_DN3170_c0_g1_i4.p2	6	17	23	967	326	215	124	148	139
TRINITY_DN2736_c0_g1_i7.p1	38	42	31	108	79	67	36	21	36
TRINITY_DN739_c0_g1_i2.p1	1317	1478	1378	3559	3349	3654	2190	1691	1533
TRINITY_DN27066_c0_g1_i2.p1	0	2	0	59	54	158	16	10	7
TRINITY_DN18953_c0_g1_i1.p1	109	107	185	797	959	981	95	411	327
TRINITY_DN4923_c0_g1_i1.p1	1243	1124	1290	6597	5016	3894	1939	3091	2198
TRINITY_DN478_c0_g3_i2.p2	26	21	26	91	150	129	20	60	33
TRINITY_DN1626_c0_g1_i7.p1	304	275	224	1663	1325	1182	500	747	597
TRINITY_DN16107_c0_g1_i2.p1	4	0	6	200	160	70	18	5	4
TRINITY_DN43529_c0_g1_i1.p2	0	0	0	18	19	11	0	0	0
TRINITY_DN24195_c0_g1_i13.p1	0	0	0	26	41	27	2	0	0
TRINITY_DN41549_c0_g1_i1.p1	3513	3908	3704	11425	20180	13029	8432	7531	5043
TRINITY_DN5439_c0_g1_i5.p1	172	263	234	502	860	694	331	227	186
TRINITY_DN14004_c0_g1_i1.p1	0	0	0	49	41	57	0	0	0
TRINITY_DN9391_c0_g1_i1.p1	0	0	0	120	32	5	0	0	0
TRINITY_DN31621_c1_g1_i4.p1	2	0	0	238	173	55	7	15	2
TRINITY_DN54406_c0_g1_i2.p1	0	0	2	454	575	849	2	8	31
TRINITY_DN52563_c0_g1_i5.p1	1	3	2	63	47	8	0	0	0
TRINITY_DN7057_c0_g1_i2.p1	1872	2290	2441	12467	9746	9387	2232	2866	3081
TRINITY_DN33598_c0_g1_i5.p2	14	7	23	86	55	34	9	6	13
TRINITY_DN29561_c0_g2_i1.p1	26	12	63	309	336	183	94	116	116
TRINITY_DN26593_c0_g1_i2.p1	184	301	318	662	735	529	305	365	391
TRINITY_DN194_c1_g3_i1.p1	279	287	353	968	891	865	554	495	432
TRINITY_DN7278_c0_g1_i7.p1	1	9	3	84	96	66	14	35	21
TRINITY_DN12273_c0_g1_i1.p1	97	74	143	715	546	577	272	255	84
TRINITY_DN5744_c0_g1_i11.p1	7	7	5	161	374	860	66	30	10
TRINITY_DN11134_c0_g1_i4.p1	625	772	1079	1638	1349	1683	557	534	848
TRINITY_DN11134_c0_g1_i4.p3	669	859	1139	1735	1420	1970	612	601	906
TRINITY_DN1679_c0_g1_i1.p2	69	159	357	481	940	580	246	190	287
TRINITY_DN1903_c0_g3_i1.p1	1893	2004	2017	12060	11978	7618	5737	3674	2525
TRINITY_DN18849_c0_g1_i4.p1	0	0	0	179	34	0	0	0	0
TRINITY_DN6709_c0_g1_i10.p1	0	1	2	70	71	16	5	12	5
TRINITY_DN2720_c0_g1_i12.p1	93	94	113	243	185	135	68	92	89
TRINITY_DN95905_c0_g1_i2.p1	2	4	8	56	47	36	0	0	0
TRINITY_DN1289_c0_g2_i6.p4	60	73	75	126	202	92	48	52	57
TRINITY_DN1289_c0_g2_i6.p2	60	73	75	126	202	92	48	52	57
TRINITY_DN1289_c0_g2_i6.p3	60	73	75	126	202	92	48	52	57
TRINITY_DN45286_c0_g2_i1.p1	0	0	0	31	18	10	0	0	0
TRINITY_DN27862_c0_g3_i2.p1	0	0	0	34	24	58	5	0	4
TRINITY_DN3617_c0_g2_i14.p2	61	64	62	430	423	332	165	150	91
TRINITY_DN91882_c2_g1_i1.p1	20	37	143	2419	2295	2661	865	1117	993
TRINITY_DN9748_c0_g1_i6.p1	15	22	40	1009	1152	827	617	363	499
TRINITY_DN6456_c2_g2_i2.p1	0	0	0	1320	1412	1565	18	4	0
TRINITY_DN11896_c0_g1_i2.p1	7	4	1	764	885	485	5	27	22
TRINITY_DN414_c0_g3_i1.p2	57	51	54	220	211	102	50	70	44
TRINITY_DN414_c0_g3_i1.p1	50	44	45	193	188	83	42	58	41
TRINITY_DN8071_c1_g1_i4.p1	17	32	68	259	268	170	75	116	87
TRINITY_DN2374_c0_g1_i13.p1	190	221	241	843	761	639	449	348	295
TRINITY_DN5915_c0_g1_i12.p2	25	25	24	178	203	161	91	88	59
TRINITY_DN5915_c0_g1_i12.p1	21	17	21	160	178	129	74	76	47
TRINITY_DN3015_c0_g4_i1.p2	255	223	301	651	497	304	167	278	262
TRINITY_DN3015_c0_g4_i1.p1	255	223	301	651	497	304	168	278	262
TRINITY_DN3004_c0_g1_i2.p1	0	0	0	115	143	92	19	5	0
TRINITY_DN14_c0_g1_i1.p1	924	1174	1621	4332	5328	5153	1708	1432	1383
TRINITY_DN27036_c0_g2_i2.p2	122	72	132	212	245	206	49	85	93
TRINITY_DN5292_c0_g1_i2.p1	0	2	0	236	301	268	22	9	6
TRINITY_DN316_c0_g1_i2.p1	3	2	15	3490	2911	4852	28	0	4
TRINITY_DN316_c0_g1_i2.p2	4	3	19	4134	3285	5456	38	23	5
TRINITY_DN487_c0_g1_i18.p3	99	27	23	284	291	119	36	73	70
TRINITY_DN13659_c0_g1_i2.p1	127	121	203	850	1393	515	104	352	154
TRINITY_DN2109_c0_g1_i3.p1	12	6	14	295	474	581	48	136	60
TRINITY_DN6884_c0_g1_i2.p1	358	348	576	889	857	1209	353	378	327
TRINITY_DN1654_c4_g1_i6.p1	10	14	3	130	100	52	4	14	8
TRINITY_DN8536_c0_g1_i10.p1	164	209	268	3177	3615	7907	987	1134	634
TRINITY_DN2714_c0_g1_i3.p1	2278	4683	4014	12818	18651	25966	6975	6544	5029
TRINITY_DN4945_c0_g1_i15.p1	62	94	87	184	162	194	37	43	36
TRINITY_DN13659_c0_g1_i12.p1	179	113	156	899	1323	467	114	341	144
TRINITY_DN1551_c0_g1_i5.p1	7	22	33	326	352	278	132	97	67
TRINITY_DN2949_c0_g1_i17.p2	363	289	388	1517	1443	560	428	635	447
TRINITY_DN5176_c0_g1_i5.p1	1196	1052	1273	7557	5524	3183	1902	2706	2252
TRINITY_DN18928_c0_g2_i3.p1	3	0	3	649	294	94	11	0	4
TRINITY_DN3062_c1_g1_i5.p1	140	180	193	602	646	646	200	212	124
TRINITY_DN2967_c0_g2_i2.p1	2086	3176	2882	10976	3706	4711	2026	2975	2260
TRINITY_DN6548_c0_g1_i9.p1	287	337	422	1551	2087	1720	493	790	404
TRINITY_DN13383_c0_g1_i4.p1	48	37	51	162	178	164	64	65	82
TRINITY_DN4619_c1_g1_i1.p1	35	35	71	281	428	304	140	138	138
TRINITY_DN90_c0_g4_i3.p1	158	335	188	2724	2067	1708	929	822	690
TRINITY_DN3256_c0_g1_i12.p1	161	249	200	585	531	291	213	236	247
TRINITY_DN175375_c0_g1_i1.p1	0	0	0	131	128	45	0	4	11
TRINITY_DN7285_c0_g1_i7.p1	136	204	209	1590	2013	1977	565	412	367
TRINITY_DN626_c0_g1_i3.p2	12	7	12	181	143	116	37	45	26
TRINITY_DN626_c0_g1_i3.p1	12	7	12	181	143	116	37	45	26
TRINITY_DN626_c0_g1_i7.p2	7	8	11	168	127	110	34	37	22
TRINITY_DN14087_c0_g1_i2.p2	96	170	258	473	443	527	123	138	280
TRINITY_DN2369_c0_g1_i8.p1	574	644	764	1650	1083	1128	442	597	580
TRINITY_DN33741_c0_g1_i1.p1	8	4	0	111	46	56	0	0	0
TRINITY_DN26559_c0_g1_i2.p3	8	6	13	63	50	59	14	19	14
TRINITY_DN8216_c0_g1_i5.p1	8	72	14	912	370	166	73	56	46
TRINITY_DN5980_c0_g1_i3.p1	0	4	8	362	261	431	37	22	2
TRINITY_DN8055_c0_g1_i2.p1	146	198	217	372	519	306	129	185	142
TRINITY_DN2982_c0_g2_i1.p1	162	349	215	729	704	332	95	100	297
TRINITY_DN8646_c0_g1_i2.p1	0	6	0	763	347	565	18	24	6
TRINITY_DN8225_c0_g2_i5.p2	189	659	487	7076	7901	7052	3111	4823	2038
TRINITY_DN747_c0_g1_i1.p2	48	59	74	425	332	190	113	162	161
TRINITY_DN22700_c0_g3_i1.p1	0	0	0	163	48	64	0	0	0
TRINITY_DN2874_c0_g1_i1.p1	76	83	44	661	510	440	284	187	125
TRINITY_DN5579_c0_g1_i8.p1	296	256	297	1798	1235	879	221	310	223
TRINITY_DN3108_c0_g1_i7.p1	17	25	33	783	1751	3466	521	527	306
TRINITY_DN34829_c0_g1_i1.p1	0	0	0	77	4	5	0	0	0
TRINITY_DN6020_c0_g3_i4.p2	878	1363	1216	2145	2675	2023	1254	891	1030
TRINITY_DN6384_c0_g2_i5.p1	1207	1232	1861	6014	4782	3938	1891	2547	2928
TRINITY_DN25_c1_g3_i1.p1	7	132	187	881	672	998	165	163	140
TRINITY_DN9620_c0_g1_i4.p1	10	8	19	112	89	64	24	14	15
TRINITY_DN12885_c0_g1_i2.p1	0	0	0	101	109	117	21	1	3
TRINITY_DN26009_c0_g1_i2.p1	0	0	0	156	65	6	0	0	0
TRINITY_DN7988_c0_g1_i2.p1	7	9	6	69	94	83	17	21	17
TRINITY_DN26823_c0_g1_i1.p1	0	9	5	103	85	35	0	4	2
TRINITY_DN1888_c0_g3_i6.p1	21	54	54	322	416	300	78	67	87
TRINITY_DN1888_c0_g3_i6.p2	27	70	61	356	447	465	103	73	94
TRINITY_DN8602_c0_g1_i11.p1	21	27	35	106	97	174	29	14	12
TRINITY_DN9704_c0_g1_i4.p1	107	82	132	973	858	636	101	159	109
TRINITY_DN26823_c0_g1_i5.p1	0	1	0	75	46	30	0	0	3
TRINITY_DN4638_c0_g1_i16.p4	141	117	130	760	860	383	359	275	258
TRINITY_DN4638_c0_g1_i16.p2	141	117	130	760	860	383	359	275	258
TRINITY_DN4638_c0_g1_i16.p3	141	117	130	760	860	383	359	275	258
TRINITY_DN4638_c0_g1_i16.p1	141	117	130	760	860	383	359	275	258
TRINITY_DN8885_c0_g1_i2.p1	15	24	48	103	102	65	43	34	34
TRINITY_DN319_c0_g1_i4.p1	0	0	0	482	406	217	2	7	11
TRINITY_DN9356_c0_g1_i1.p1	0	2	6	77	49	234	27	22	10
TRINITY_DN21849_c0_g1_i2.p1	0	0	0	113	58	71	0	0	2
TRINITY_DN4034_c0_g1_i5.p1	32	55	63	226	163	160	75	78	80
TRINITY_DN4703_c0_g1_i6.p1	15	31	29	184	499	622	37	118	121
TRINITY_DN494_c0_g1_i5.p1	19	471	120	2382	3530	980	166	222	683
TRINITY_DN4137_c0_g1_i19.p2	69	80	72	767	196	75	42	63	65
TRINITY_DN5682_c0_g2_i1.p2	205	348	257	1104	1137	1261	646	498	531
TRINITY_DN1188_c0_g1_i4.p1	780	880	595	1385	1848	1803	876	934	898
TRINITY_DN25126_c0_g2_i1.p1	350	405	509	2497	2570	4559	308	439	306
TRINITY_DN6396_c0_g1_i2.p1	175	158	155	929	1101	1543	418	371	287
TRINITY_DN1139_c0_g1_i1.p3	82	83	84	1693	758	343	277	257	271
TRINITY_DN7843_c0_g1_i8.p1	110	87	187	603	430	215	128	57	167
TRINITY_DN7459_c0_g2_i1.p2	8	6	14	80	59	21	10	8	9
TRINITY_DN54032_c0_g1_i1.p1	2	0	0	102	60	6	0	0	0
TRINITY_DN17670_c0_g1_i2.p1	0	26	32	374	408	549	124	191	129
TRINITY_DN15837_c0_g1_i3.p1	26	24	19	133	442	156	28	33	80
TRINITY_DN8848_c0_g1_i2.p2	13	6	15	210	244	146	31	7	30
TRINITY_DN6538_c1_g1_i1.p1	1210	1184	1280	2433	3396	1649	1363	1407	1153
TRINITY_DN55643_c0_g2_i3.p1	17	64	17	440	514	206	78	106	170
TRINITY_DN9962_c0_g1_i3.p1	241	279	414	887	1294	943	220	249	234
TRINITY_DN1196_c0_g1_i5.p1	1619	2928	2716	12583	10573	4773	5058	4346	3994
TRINITY_DN23_c0_g1_i2.p1	79	60	76	320	456	325	161	93	48
TRINITY_DN11463_c0_g1_i2.p1	68	133	141	349	356	406	177	175	177
TRINITY_DN2431_c0_g2_i4.p1	0	3	0	493	563	131	15	19	17
TRINITY_DN16086_c0_g1_i12.p1	199	218	225	942	694	709	338	377	387
TRINITY_DN12319_c0_g2_i2.p1	164	230	207	484	735	318	97	82	189
TRINITY_DN365_c1_g2_i1.p1	572	737	1452	2248	1712	3439	758	1057	1064
TRINITY_DN1476_c0_g3_i1.p1	3722	3184	2642	10207	14282	9039	6073	4014	3163
TRINITY_DN1441_c0_g1_i24.p2	0	0	2	318	226	85	0	3	3
TRINITY_DN3088_c0_g1_i2.p1	3	55	10	172	248	247	82	94	86
TRINITY_DN6502_c0_g2_i3.p2	13	26	19	165	95	148	41	32	36
TRINITY_DN4625_c0_g1_i8.p1	111	105	164	315	448	378	188	148	176
TRINITY_DN14750_c1_g1_i1.p2	5	0	0	42	39	19	4	2	0
TRINITY_DN14750_c1_g1_i1.p1	4	0	0	33	39	16	0	2	0
TRINITY_DN6020_c0_g3_i1.p2	899	1385	1256	2158	2651	2070	1249	889	1052
TRINITY_DN18673_c0_g1_i2.p2	2	0	1	92	77	94	9	6	7
TRINITY_DN44136_c0_g1_i1.p2	0	0	0	60	16	2	0	0	0
TRINITY_DN18928_c0_g1_i7.p1	0	0	5	104	86	129	15	17	3
TRINITY_DN1441_c0_g1_i2.p2	1	0	2	275	159	69	0	1	1
TRINITY_DN1441_c0_g1_i2.p1	1	0	0	252	144	63	0	0	1
TRINITY_DN21019_c0_g1_i1.p1	0	0	0	48	9	17	0	0	0
TRINITY_DN5663_c0_g1_i5.p2	98	101	219	3642	4133	3584	1595	1897	1295
TRINITY_DN18678_c0_g1_i10.p2	2	4	14	36	48	31	6	4	3
TRINITY_DN11506_c0_g1_i3.p1	21	19	28	123	96	102	11	21	13
TRINITY_DN2874_c0_g1_i4.p1	82	106	55	804	727	603	378	226	166
TRINITY_DN18568_c0_g1_i1.p2	0	2	3	28	28	37	4	3	4
TRINITY_DN10262_c0_g1_i1.p1	182	311	296	553	502	389	254	219	195
TRINITY_DN31967_c0_g1_i1.p1	8	10	6	59	72	30	14	14	16
TRINITY_DN3320_c0_g1_i2.p1	65	107	122	833	777	1218	366	456	301
TRINITY_DN5915_c0_g1_i10.p2	28	40	20	193	224	146	108	105	77
TRINITY_DN6797_c0_g1_i5.p1	826	826	496	2056	1954	1244	800	877	844
TRINITY_DN1331_c1_g1_i6.p2	82	104	100	456	471	221	218	146	148
TRINITY_DN1331_c1_g1_i6.p1	82	104	100	456	471	221	218	146	148
TRINITY_DN7413_c0_g1_i3.p1	140	228	243	536	443	398	200	225	220
TRINITY_DN70622_c0_g1_i2.p2	0	0	0	66	28	63	2	8	5
TRINITY_DN2489_c0_g2_i6.p1	4	14	5	823	682	354	65	15	3
TRINITY_DN478_c0_g3_i1.p2	31	23	41	142	210	144	26	70	32
TRINITY_DN4034_c0_g1_i8.p1	19	28	32	256	202	212	113	118	71
TRINITY_DN38487_c1_g1_i1.p2	0	0	0	222	65	5	5	0	0
TRINITY_DN2949_c0_g1_i4.p2	377	276	361	1718	1209	592	425	578	477
TRINITY_DN1086_c0_g1_i1.p1	54	40	125	504	662	661	284	336	298
TRINITY_DN10195_c0_g1_i4.p2	16	42	37	516	1363	90	64	31	90
TRINITY_DN33872_c0_g1_i2.p1	0	0	0	126	38	63	0	0	0
TRINITY_DN396_c0_g1_i6.p1	0	10	44	176	150	260	75	67	42
TRINITY_DN396_c0_g1_i6.p2	75	95	56	291	198	210	101	83	49
TRINITY_DN4581_c0_g1_i8.p1	226	249	375	1185	1357	773	364	366	343
TRINITY_DN5682_c0_g1_i3.p2	91	123	88	512	387	406	132	170	158
TRINITY_DN19999_c0_g1_i3.p1	3	6	20	499	179	437	36	78	35
TRINITY_DN2934_c0_g1_i4.p1	39	34	44	263	909	268	85	169	87
TRINITY_DN38309_c1_g1_i1.p1	0	0	0	58	18	25	2	0	2
TRINITY_DN16086_c0_g1_i9.p3	94	209	205	904	581	651	306	351	325
TRINITY_DN9734_c0_g1_i2.p1	8	23	31	575	397	550	59	43	29
TRINITY_DN13170_c0_g1_i2.p1	2042	2266	3963	11888	9326	8752	5067	6246	4104
TRINITY_DN9467_c0_g1_i4.p1	30	39	82	648	955	902	63	93	75
TRINITY_DN9467_c0_g1_i4.p3	39	45	110	815	1133	1044	89	123	94
TRINITY_DN4625_c0_g1_i3.p1	82	87	110	297	378	334	150	137	158
TRINITY_DN5663_c0_g1_i13.p4	58	98	181	3213	1561	3271	1014	944	758
TRINITY_DN22705_c0_g1_i1.p1	0	0	1	271	142	62	8	27	20
TRINITY_DN2918_c1_g1_i4.p1	286	259	303	1083	939	1020	371	495	404
TRINITY_DN19412_c0_g2_i5.p1	0	0	1	35	35	18	1	0	1
TRINITY_DN17897_c0_g1_i3.p1	0	0	0	111	72	27	1	4	2
TRINITY_DN2874_c0_g1_i3.p1	75	81	42	753	648	541	332	204	165
TRINITY_DN3464_c0_g1_i13.p2	10	26	17	275	444	233	141	44	45
TRINITY_DN38647_c0_g3_i1.p1	0	0	0	50	33	11	0	0	0
TRINITY_DN7243_c0_g1_i8.p1	656	669	787	1519	1357	1581	435	649	632
TRINITY_DN32918_c0_g1_i1.p3	0	15	41	5947	4510	1382	596	1607	949
TRINITY_DN8622_c0_g3_i1.p2	21	2	11	97	127	46	9	4	8
TRINITY_DN1851_c0_g2_i9.p1	167	182	123	623	827	539	167	165	103
TRINITY_DN5912_c0_g1_i1.p1	4	0	0	456	415	155	70	91	29
TRINITY_DN3240_c0_g1_i11.p2	40	39	70	379	277	187	130	160	136
TRINITY_DN3240_c0_g1_i11.p1	40	39	70	379	277	187	130	160	136
TRINITY_DN3240_c0_g1_i9.p2	37	46	63	378	266	195	113	144	133
TRINITY_DN1841_c0_g1_i7.p1	336	309	528	1444	1599	1112	780	577	368
TRINITY_DN36_c0_g1_i13.p2	176	228	193	445	440	546	102	174	165
TRINITY_DN2386_c1_g1_i8.p1	8	20	9	243	262	247	43	28	49
TRINITY_DN9114_c1_g2_i3.p4	3	0	2	1094	1190	61	37	50	19
TRINITY_DN1888_c0_g3_i4.p2	23	128	75	507	590	789	122	87	105
TRINITY_DN25091_c1_g1_i2.p1	0	5	0	33	43	102	2	6	0
TRINITY_DN4638_c0_g1_i10.p1	216	180	234	1010	1190	579	491	453	393
TRINITY_DN4638_c0_g1_i10.p2	216	180	234	1010	1190	579	491	453	393
TRINITY_DN357_c1_g2_i4.p1	91	93	157	778	585	827	135	285	244
TRINITY_DN35933_c0_g1_i3.p1	204	147	315	482	646	507	122	205	249
TRINITY_DN35933_c0_g1_i7.p1	117	70	88	234	243	181	56	52	73
TRINITY_DN615_c0_g1_i8.p1	54	78	72	281	309	212	56	57	90
TRINITY_DN11352_c0_g1_i1.p1	1	1	0	57	90	118	22	3	3
TRINITY_DN4909_c0_g1_i5.p1	561	438	327	1775	2101	1382	1007	878	777
TRINITY_DN10049_c0_g1_i1.p1	145	150	143	336	576	241	148	151	157
TRINITY_DN4638_c0_g1_i11.p1	134	106	140	815	870	364	297	272	266
TRINITY_DN22133_c0_g1_i3.p1	0	0	0	317	4	28	0	0	0
TRINITY_DN5141_c0_g1_i7.p2	691	584	599	2483	1961	3091	547	1416	857
TRINITY_DN5176_c0_g1_i4.p1	640	600	824	4439	3252	1783	1003	1683	1327
TRINITY_DN109500_c0_g1_i2.p3	0	0	0	16	17	12	0	0	0
TRINITY_DN14158_c0_g1_i1.p1	802	1177	1375	2467	2115	4930	947	1261	1078
TRINITY_DN29230_c0_g1_i1.p1	7	48	29	294	289	175	31	18	8
TRINITY_DN3915_c0_g1_i2.p1	2	0	8	2814	919	473	88	7	153
TRINITY_DN8498_c0_g1_i1.p1	331	619	369	1445	3040	738	245	313	230
TRINITY_DN25146_c0_g1_i9.p1	24	42	52	259	338	367	30	45	73
TRINITY_DN1939_c0_g1_i5.p1	686	636	949	2036	1598	1094	671	908	856
TRINITY_DN23636_c0_g1_i4.p1	0	0	0	694	247	167	0	0	2
TRINITY_DN8536_c0_g1_i4.p1	175	196	293	3531	3791	8194	953	981	559
TRINITY_DN6449_c0_g1_i6.p2	163	118	183	604	858	608	438	270	258
TRINITY_DN6449_c0_g1_i6.p1	163	118	183	604	858	608	438	270	258
TRINITY_DN6456_c2_g2_i1.p1	0	0	0	1046	1080	1095	6	4	0
TRINITY_DN754_c0_g1_i11.p1	109	137	153	344	319	225	163	150	108
TRINITY_DN3372_c2_g1_i2.p1	110	158	250	564	707	381	280	295	324
TRINITY_DN9704_c0_g1_i2.p1	124	78	191	883	767	527	99	166	107
TRINITY_DN25694_c0_g1_i6.p1	0	1	0	16	24	26	0	1	1
TRINITY_DN8622_c0_g1_i2.p1	9	5	15	135	271	180	23	14	17
TRINITY_DN373_c0_g2_i6.p4	95	149	148	495	264	512	91	173	163
TRINITY_DN3958_c0_g2_i2.p1	97	155	221	446	354	271	101	127	84
TRINITY_DN7083_c1_g2_i2.p1	0	0	0	422	604	705	0	0	0
TRINITY_DN6530_c1_g1_i1.p1	0	0	0	16	10	16	0	0	0
TRINITY_DN1394_c0_g1_i11.p1	34	27	54	1050	765	1153	304	433	122
TRINITY_DN1276_c0_g1_i2.p1	976	1278	1230	3028	3152	2699	1528	1797	1600
TRINITY_DN9961_c0_g1_i7.p1	72	174	196	1624	787	854	160	284	223
TRINITY_DN5171_c0_g1_i5.p1	315	324	299	1949	1995	1600	1167	761	534
TRINITY_DN9001_c0_g1_i3.p1	106	121	136	411	401	539	216	200	198
TRINITY_DN1960_c0_g1_i5.p2	133	57	93	430	756	311	103	200	155
TRINITY_DN2479_c0_g1_i1.p1	0	0	0	52	44	51	0	0	0
TRINITY_DN194_c1_g1_i1.p1	732	728	918	5130	3459	2711	1132	1718	1301
TRINITY_DN7866_c0_g3_i1.p1	9	8	18	85	62	121	6	8	6
TRINITY_DN3524_c0_g1_i6.p1	24	44	33	249	194	183	101	128	99
TRINITY_DN11468_c0_g2_i1.p1	373	440	277	888	1080	579	371	420	384
TRINITY_DN15376_c0_g1_i7.p1	3	2	13	267	154	76	24	56	34
TRINITY_DN2386_c1_g1_i1.p1	18	21	21	198	247	205	35	33	39
TRINITY_DN2386_c1_g1_i1.p2	18	21	21	198	247	205	35	33	39
TRINITY_DN8323_c0_g1_i4.p1	256	285	256	659	519	527	266	319	267
TRINITY_DN16397_c0_g1_i7.p1	0	3	0	90	48	64	6	1	5
TRINITY_DN1970_c0_g1_i1.p1	0	20	16	622	490	170	77	7	4
TRINITY_DN1289_c0_g2_i6.p1	60	73	75	126	202	92	48	52	57
TRINITY_DN5970_c0_g1_i7.p2	20	28	12	102	125	80	29	42	28
TRINITY_DN2678_c0_g1_i2.p1	107	507	209	1343	1531	2192	515	306	209
TRINITY_DN1773_c2_g2_i1.p1	0	0	0	577	437	193	4	4	8
TRINITY_DN2657_c0_g1_i5.p1	0	2	3	775	884	600	7	11	29
TRINITY_DN1647_c0_g1_i9.p2	187	229	283	832	590	739	335	390	346
TRINITY_DN18796_c0_g1_i4.p2	1	3	2	98	81	45	7	6	3
TRINITY_DN903_c0_g1_i9.p1	55	55	37	812	782	473	343	172	249
TRINITY_DN12686_c1_g2_i1.p1	13	13	23	182	210	90	62	20	36
TRINITY_DN494_c0_g1_i8.p1	17	409	83	1715	2873	689	153	188	485
TRINITY_DN8834_c0_g1_i11.p2	86	121	161	640	535	620	369	299	274
TRINITY_DN2489_c0_g2_i4.p1	3	22	2	772	664	377	55	16	4
TRINITY_DN660_c0_g3_i2.p1	2057	1977	2454	6547	4982	6833	2166	3895	2422
TRINITY_DN2016_c0_g1_i1.p1	368	469	637	3158	2405	2211	1217	1456	1250
TRINITY_DN123861_c0_g1_i1.p1	0	0	0	66	23	20	0	0	0
TRINITY_DN8885_c0_g1_i17.p1	14	9	19	97	99	52	27	19	29
TRINITY_DN5980_c0_g1_i1.p1	7	0	12	377	312	470	30	32	8
TRINITY_DN1544_c0_g2_i7.p1	19	41	21	154	185	203	62	17	37
TRINITY_DN2021_c1_g2_i12.p2	25	44	54	201	244	182	104	110	87
TRINITY_DN3007_c3_g1_i1.p1	80	41	106	288	248	164	21	10	27
TRINITY_DN1325_c0_g1_i6.p1	211	150	177	577	1232	479	352	185	278
TRINITY_DN3772_c0_g1_i1.p1	0	2	0	443	548	170	1	2	0
TRINITY_DN26790_c0_g1_i1.p1	12	43	52	1145	1044	1066	481	580	494
TRINITY_DN5820_c0_g1_i5.p2	10	28	8	138	108	73	21	29	15
TRINITY_DN1841_c0_g1_i1.p1	324	298	506	1351	1562	1108	788	557	385
TRINITY_DN1963_c0_g2_i3.p1	330	339	386	3124	1931	2245	353	481	588
TRINITY_DN12484_c3_g1_i1.p1	0	4	11	147	129	102	29	43	42
TRINITY_DN34814_c0_g1_i2.p1	0	0	0	25	13	32	0	0	0
TRINITY_DN18115_c0_g1_i8.p1	15	22	47	141	129	70	28	30	36
TRINITY_DN11552_c0_g1_i1.p1	0	0	4	325	317	136	14	20	0
TRINITY_DN1391_c2_g1_i7.p4	1240	1492	2463	4631	4408	2771	1904	1690	1378
TRINITY_DN3772_c0_g1_i6.p2	0	0	0	267	275	68	1	1	0
TRINITY_DN3772_c0_g1_i2.p1	0	2	0	403	536	128	1	2	0
TRINITY_DN23640_c0_g1_i1.p1	0	0	3	303	227	550	42	14	14
TRINITY_DN41549_c0_g1_i2.p1	4066	4753	4353	14512	23946	15725	8976	8922	5657
TRINITY_DN464_c1_g1_i3.p1	0	0	0	77	193	71	33	32	40
TRINITY_DN464_c1_g1_i3.p2	73	54	79	239	308	125	74	78	92
TRINITY_DN21019_c0_g2_i1.p2	21	5	3	315	255	126	14	20	2
TRINITY_DN8848_c0_g1_i5.p2	25	11	19	291	343	138	36	12	36
TRINITY_DN12498_c3_g1_i1.p1	0	0	14	156	168	44	0	0	2
TRINITY_DN5207_c0_g1_i4.p1	93	163	214	999	761	654	187	254	276
TRINITY_DN6088_c0_g1_i1.p1	123	243	295	1031	803	1131	435	543	496
TRINITY_DN36693_c0_g1_i4.p1	0	0	0	110	69	35	24	20	15
TRINITY_DN6815_c0_g1_i3.p1	0	0	0	299	174	145	13	7	2
TRINITY_DN1679_c0_g1_i5.p1	71	86	166	527	436	323	128	85	152
TRINITY_DN641_c0_g2_i2.p1	52	60	46	1302	1091	597	90	120	53
TRINITY_DN23987_c0_g1_i3.p1	18	10	6	255	195	283	51	33	50
TRINITY_DN4101_c0_g1_i11.p1	199	220	346	7418	3440	3569	1675	1416	1052
TRINITY_DN12654_c0_g1_i5.p1	21	17	21	199	293	140	62	93	38
TRINITY_DN4821_c0_g1_i15.p1	2	3	0	126	99	125	0	0	7
TRINITY_DN9089_c0_g1_i3.p1	25	6	15	152	140	35	9	10	12
TRINITY_DN12273_c0_g1_i2.p1	117	80	163	796	576	597	289	259	88
TRINITY_DN4187_c0_g3_i1.p1	0	12	17	100	90	115	8	7	12
TRINITY_DN3177_c0_g1_i4.p1	2	0	0	176	268	86	27	28	4
TRINITY_DN3198_c0_g1_i1.p1	3537	3334	3311	7374	9186	7813	3565	3762	3799
TRINITY_DN28030_c0_g1_i1.p2	0	0	0	14	33	23	0	0	0
TRINITY_DN414_c0_g3_i11.p1	55	38	49	177	190	73	47	63	49
TRINITY_DN414_c0_g3_i11.p2	66	48	57	209	214	90	56	73	59
TRINITY_DN16086_c0_g1_i1.p1	129	159	165	641	425	418	225	222	242
TRINITY_DN16538_c0_g1_i5.p1	5	2	11	104	118	91	11	9	24
TRINITY_DN6815_c0_g1_i11.p1	0	0	0	60	39	23	5	0	0
TRINITY_DN5915_c0_g1_i6.p2	27	23	22	191	205	149	100	94	102
TRINITY_DN2904_c0_g1_i3.p1	20	27	14	2348	2302	595	426	177	250
TRINITY_DN2516_c1_g1_i8.p2	2213	2460	3491	4880	6329	6529	3087	3022	3034
TRINITY_DN8172_c0_g1_i4.p1	4	6	32	118764	165060	232286	6	0	18
TRINITY_DN477_c0_g2_i1.p1	0	0	0	136	145	77	0	0	0
TRINITY_DN761_c0_g1_i3.p1	150	129	224	1148	1322	1213	554	543	288
TRINITY_DN30743_c0_g2_i3.p1	0	0	0	114	69	26	0	0	0
TRINITY_DN27808_c0_g1_i3.p3	0	0	0	22	8	14	0	0	0
TRINITY_DN4941_c0_g1_i1.p1	116	117	187	1686	1449	934	292	399	374
TRINITY_DN24055_c0_g1_i4.p1	0	2	2	80	93	24	6	16	6
TRINITY_DN765_c1_g1_i1.p1	102	204	167	982	769	389	321	339	297
TRINITY_DN23761_c0_g1_i1.p1	6	16	23	379	451	129	111	47	24
TRINITY_DN27186_c0_g1_i1.p1	0	0	1	98	52	23	12	15	9
TRINITY_DN40656_c1_g1_i1.p1	0	0	0	20	13	45	0	0	0
TRINITY_DN31913_c0_g1_i9.p6	2	11	19	419	257	21	10	24	27
TRINITY_DN1441_c0_g1_i17.p2	1	0	3	262	178	70	1	1	2
TRINITY_DN1441_c0_g1_i17.p1	0	0	0	239	163	60	0	0	1
TRINITY_DN4945_c0_g1_i3.p1	67	41	84	191	357	198	37	46	36
TRINITY_DN465_c1_g1_i2.p1	317	347	313	1035	1864	1169	11	86	203
TRINITY_DN6797_c0_g1_i1.p1	894	886	528	2166	2065	1324	855	902	864
TRINITY_DN37125_c0_g1_i6.p1	41	38	48	246	181	361	83	81	58
TRINITY_DN9939_c0_g3_i1.p1	0	0	0	15	14	47	0	0	0
TRINITY_DN16585_c0_g1_i2.p1	0	0	0	170	110	134	0	10	8
TRINITY_DN4794_c1_g1_i4.p1	47	61	67	1212	1388	1251	627	421	207
TRINITY_DN5970_c0_g1_i19.p1	39	32	34	150	156	96	78	61	54
TRINITY_DN4834_c0_g1_i16.p4	92	103	106	488	408	101	98	70	87
TRINITY_DN7856_c0_g1_i2.p1	886	981	903	22489	22199	20278	14728	8619	9447
TRINITY_DN31508_c0_g1_i5.p1	3	10	20	63	107	214	1	0	2
TRINITY_DN28171_c0_g1_i11.p1	0	0	0	31	36	38	0	0	0
TRINITY_DN28171_c0_g1_i11.p2	0	0	0	33	39	43	0	0	0
TRINITY_DN1929_c0_g1_i1.p1	20	64	9	3033	2558	1228	667	673	253
TRINITY_DN64252_c0_g1_i1.p1	0	0	0	82	38	26	0	2	0
TRINITY_DN7115_c0_g4_i3.p2	70	107	143	871	1098	934	112	225	313
TRINITY_DN3394_c1_g1_i10.p1	957	1256	1704	7498	7072	9610	1285	1846	1399
TRINITY_DN1452_c0_g1_i1.p1	435	385	327	3068	3281	3325	2161	1542	1501
TRINITY_DN14748_c0_g2_i1.p1	49	52	64	244	214	75	13	2	13
TRINITY_DN33976_c0_g1_i2.p2	4	0	0	30	33	27	3	6	5
TRINITY_DN283_c0_g1_i6.p1	297	310	314	909	1446	1467	373	387	287
TRINITY_DN24939_c0_g1_i1.p1	0	0	0	159	35	8	0	0	0
TRINITY_DN9114_c2_g1_i1.p5	0	3	3	556	657	292	45	8	8
TRINITY_DN3472_c0_g2_i8.p1	95	122	176	476	326	297	129	104	113
TRINITY_DN2874_c0_g1_i2.p1	65	95	44	706	618	534	321	198	146
TRINITY_DN13647_c0_g2_i2.p1	0	36	2	3423	7221	6793	514	122	88
TRINITY_DN28613_c0_g1_i2.p2	0	0	0	214	25	0	0	0	0
TRINITY_DN1074_c1_g3_i1.p1	273	269	287	903	596	304	211	292	272
TRINITY_DN11468_c0_g1_i1.p1	1064	1344	1058	2334	2367	1867	844	1055	515
TRINITY_DN5171_c0_g1_i10.p1	303	293	270	1930	1949	1504	927	643	495
TRINITY_DN3524_c0_g1_i4.p1	64	157	127	685	601	577	310	242	289
TRINITY_DN1115_c0_g1_i2.p1	1449	2357	2682	4088	4175	4453	2046	2775	2282
TRINITY_DN215_c0_g1_i2.p1	1014	1097	956	7812	6035	3858	1671	1502	1447
TRINITY_DN14831_c0_g1_i3.p1	0	0	0	82	37	16	2	0	0
TRINITY_DN4512_c1_g1_i2.p1	2130	2294	2632	6330	4588	2924	2230	2602	2427
TRINITY_DN64_c0_g1_i2.p1	0	0	0	344	531	1141	0	0	4
TRINITY_DN29730_c0_g1_i2.p1	0	0	0	36	23	36	0	0	0
TRINITY_DN2123_c1_g1_i4.p1	262	212	238	576	638	403	260	246	196
TRINITY_DN10686_c0_g4_i2.p1	0	4	1	139	119	125	21	39	25
TRINITY_DN1020_c1_g1_i6.p1	6	10	6	96	144	92	45	19	39
TRINITY_DN35312_c1_g1_i3.p2	34	24	27	110	82	94	41	23	17
TRINITY_DN11060_c0_g1_i3.p1	2	22	34	1028	1091	2726	509	145	159
TRINITY_DN2109_c0_g1_i1.p2	0	2	2	587	353	363	19	49	4
TRINITY_DN3914_c0_g1_i4.p1	39	44	53	487	958	357	177	181	280
TRINITY_DN1963_c0_g2_i1.p1	2	0	0	5445	2691	3862	86	8	6
TRINITY_DN9372_c0_g1_i1.p1	728	611	1275	11359	9442	11855	3676	5281	1444
TRINITY_DN7028_c0_g3_i1.p1	2	15	12	174	141	135	0	4	6
TRINITY_DN1963_c0_g2_i5.p1	1156	894	1419	2581	1742	1817	489	861	880
TRINITY_DN5027_c1_g1_i3.p1	0	0	0	115	69	20	0	0	0
TRINITY_DN10485_c0_g1_i17.p1	0	1	0	38	7	12	0	0	0
TRINITY_DN4581_c0_g1_i11.p1	226	220	337	1075	1230	708	343	355	325
TRINITY_DN13419_c0_g1_i1.p1	0	0	0	186	319	124	0	0	0
TRINITY_DN6548_c0_g1_i12.p1	310	336	392	1531	1538	1460	509	606	382
TRINITY_DN4360_c0_g1_i14.p1	34	34	67	389	377	209	93	103	168
TRINITY_DN2880_c0_g2_i5.p1	53	60	55	597	724	814	370	316	216
TRINITY_DN15083_c1_g1_i1.p1	0	4	4	93	54	6	0	0	0
TRINITY_DN11211_c1_g1_i4.p2	63	69	57	288	274	188	137	138	111
TRINITY_DN90_c0_g4_i1.p1	176	470	199	3324	2290	2040	1129	1067	937
TRINITY_DN114469_c0_g1_i3.p1	37	18	11	113	365	121	22	31	20
TRINITY_DN22175_c0_g1_i3.p1	0	0	0	45	41	18	0	0	1
TRINITY_DN220_c0_g2_i17.p1	2190	2281	1673	23759	43172	32435	8090	4919	5759
TRINITY_DN11240_c0_g1_i5.p1	50	55	93	297	337	291	129	197	174
TRINITY_DN684_c0_g1_i7.p1	144	204	260	365	515	465	162	169	190
TRINITY_DN1151_c0_g1_i4.p1	126	146	195	386	525	372	117	113	165
TRINITY_DN2657_c0_g1_i16.p1	0	2	3	285	325	185	20	2	6
TRINITY_DN7285_c0_g1_i14.p1	305	512	491	3164	3963	3543	961	1008	762
TRINITY_DN36_c0_g1_i6.p1	334	512	395	1337	1210	1673	260	366	476
TRINITY_DN18928_c0_g3_i2.p1	8	0	5	389	186	98	6	42	8
TRINITY_DN21732_c0_g1_i4.p1	2	5	0	70	50	58	18	5	4
TRINITY_DN1713_c0_g1_i2.p2	28	24	24	142	121	78	32	44	64
TRINITY_DN9458_c0_g1_i3.p1	38	51	99	850	691	860	249	170	170
TRINITY_DN25091_c1_g1_i1.p1	0	5	0	43	99	150	2	6	0
TRINITY_DN12116_c0_g2_i1.p1	335	573	493	3658	4824	3104	1829	1320	1116
TRINITY_DN3240_c0_g1_i8.p1	29	36	52	340	258	170	115	150	122
TRINITY_DN3240_c0_g1_i8.p2	29	36	52	340	258	170	115	150	122
TRINITY_DN3240_c0_g1_i8.p3	29	36	52	340	258	170	115	150	122
TRINITY_DN194_c1_g3_i2.p1	295	298	355	981	904	884	586	479	455
TRINITY_DN45707_c0_g1_i1.p1	0	0	0	60	45	32	8	8	2
TRINITY_DN33101_c0_g1_i9.p2	0	0	1	62	39	22	0	2	1
TRINITY_DN6525_c0_g1_i11.p1	0	0	0	0	121	45	0	0	0
TRINITY_DN5334_c0_g2_i19.p1	0	0	0	23	21	16	0	0	0
TRINITY_DN9713_c0_g2_i1.p1	62	61	80	135	120	152	51	51	51
TRINITY_DN6778_c1_g1_i2.p1	108	147	184	246	273	240	71	128	110
TRINITY_DN15326_c0_g3_i5.p1	0	11	25	227	175	139	64	85	83
TRINITY_DN6399_c0_g2_i6.p1	91	116	107	344	245	254	123	112	122
TRINITY_DN2759_c0_g1_i22.p1	15	35	13	286	371	161	76	62	75
TRINITY_DN5463_c1_g1_i1.p1	183	245	316	1842	2216	2671	584	710	554
TRINITY_DN5463_c1_g1_i5.p1	266	327	435	2156	2517	3185	1309	1129	916
TRINITY_DN29630_c0_g1_i5.p1	88	75	90	216	239	252	115	69	41
TRINITY_DN27583_c0_g1_i2.p1	26	261	44	1112	1444	508	153	290	371
TRINITY_DN414_c0_g3_i2.p2	78	53	87	177	216	83	48	75	50
TRINITY_DN2949_c0_g1_i15.p2	369	282	329	1489	1304	541	259	587	386
TRINITY_DN9678_c0_g2_i2.p1	3	4	5	160	216	244	6	3	2
TRINITY_DN4051_c0_g2_i9.p1	262	333	252	639	664	411	234	305	276
TRINITY_DN20199_c0_g3_i1.p1	0	0	0	27	67	18	0	0	0
TRINITY_DN3464_c0_g1_i2.p1	3	11	4	277	216	197	76	35	18
TRINITY_DN4216_c1_g1_i2.p1	0	15	19	2709	5413	7580	52	919	17
TRINITY_DN4893_c1_g1_i1.p1	95	210	302	3004	5734	8593	1556	1011	447
TRINITY_DN51554_c0_g1_i1.p1	0	0	3	562	311	137	54	12	9
TRINITY_DN3320_c0_g1_i11.p1	50	99	93	817	763	1204	320	434	285
TRINITY_DN8012_c0_g1_i3.p2	11	19	30	155	253	65	18	19	27
TRINITY_DN4255_c2_g1_i3.p1	179	176	194	2250	1792	1102	186	180	300
TRINITY_DN2541_c0_g1_i4.p1	44	39	58	213	177	95	27	26	41
TRINITY_DN7115_c0_g4_i1.p1	111	136	198	635	823	637	152	241	219
TRINITY_DN5176_c0_g1_i2.p1	306	290	329	1909	1323	758	359	772	496
TRINITY_DN33872_c0_g1_i1.p1	0	2	2	362	153	170	4	0	3
TRINITY_DN96_c0_g1_i3.p1	2	2	6	578	564	775	237	210	65
TRINITY_DN1308_c0_g1_i3.p1	4	6	9	160	124	78	6	12	13
TRINITY_DN6080_c0_g1_i17.p2	113	144	60	450	401	339	237	186	170
TRINITY_DN15996_c0_g1_i5.p2	20	64	52	1462	1886	1372	1045	657	568
TRINITY_DN4619_c1_g1_i2.p1	41	35	79	271	450	296	124	107	131
TRINITY_DN33781_c0_g1_i4.p1	0	0	0	7	37	19	0	0	0
TRINITY_DN2081_c0_g2_i1.p2	53	73	32	1647	2146	610	696	377	506
TRINITY_DN14087_c0_g1_i1.p1	100	162	162	335	285	425	110	131	154
TRINITY_DN1952_c0_g1_i3.p1	45	76	146	1042	890	403	335	420	372
TRINITY_DN1078_c0_g2_i12.p1	0	0	0	0	76	109	0	0	0
TRINITY_DN2369_c0_g1_i7.p1	629	735	794	1646	1036	1124	532	695	747
TRINITY_DN8071_c1_g1_i1.p1	9	32	69	386	365	220	130	158	119
TRINITY_DN1656_c0_g1_i6.p1	5411	9908	6246	12625	27814	22409	7866	9949	7704
TRINITY_DN11211_c1_g1_i3.p1	27	32	27	119	116	91	32	45	37
TRINITY_DN4123_c0_g1_i16.p1	0	7	6	199	222	236	24	11	9
TRINITY_DN1656_c0_g1_i2.p1	648	1308	1261	4185	4177	6956	2296	1983	1715
TRINITY_DN8216_c0_g1_i6.p1	8	77	29	809	373	158	60	52	53
TRINITY_DN9467_c0_g1_i1.p1	25	43	96	667	940	917	44	88	47
TRINITY_DN116313_c0_g1_i1.p1	0	0	0	116	8	37	0	0	0
TRINITY_DN16566_c0_g1_i1.p1	16	20	26	225	353	186	100	138	88
TRINITY_DN1316_c0_g1_i7.p1	109	149	147	593	401	186	164	178	135
TRINITY_DN5936_c3_g1_i1.p1	253	590	432	1225	2391	1382	690	644	506
TRINITY_DN12732_c0_g1_i1.p1	36	47	66	308	183	76	62	39	61
TRINITY_DN18503_c0_g1_i1.p1	36	95	75	311	245	223	16	115	36
TRINITY_DN4123_c0_g1_i10.p1	8	3	0	161	143	142	21	4	10
TRINITY_DN4625_c0_g1_i1.p1	192	185	204	610	827	753	424	296	392
TRINITY_DN15083_c0_g1_i6.p1	1	2	0	61	42	10	0	0	0
TRINITY_DN1851_c1_g1_i1.p1	88	189	134	2854	4726	850	405	434	462
TRINITY_DN7988_c0_g1_i5.p1	28	89	41	338	374	245	170	79	115
TRINITY_DN7988_c0_g1_i1.p1	33	89	36	354	392	264	188	85	111
TRINITY_DN26823_c0_g1_i2.p1	0	6	0	182	116	92	0	2	6
TRINITY_DN5286_c0_g1_i5.p1	2798	3604	3691	9310	8109	6648	3013	4446	4428
TRINITY_DN4638_c0_g1_i15.p3	222	177	196	1206	1416	656	621	465	450
TRINITY_DN4638_c0_g1_i15.p2	222	177	196	1206	1416	656	621	465	450
TRINITY_DN4638_c0_g1_i15.p1	222	177	196	1206	1416	656	621	465	450
TRINITY_DN7847_c0_g1_i2.p1	0	4	8	46	32	21	8	8	6
TRINITY_DN48605_c0_g3_i1.p1	0	0	0	56	23	2	0	0	0
TRINITY_DN2222_c0_g2_i3.p2	41	39	68	134	133	156	54	55	67
TRINITY_DN30004_c0_g1_i1.p1	0	0	0	73	6	10	0	0	0
TRINITY_DN11463_c0_g1_i6.p1	54	63	77	223	283	342	96	116	68
TRINITY_DN13980_c0_g1_i3.p3	0	3	2	275	196	10	9	11	8
TRINITY_DN1180_c1_g1_i1.p1	629	840	1146	3351	4235	5449	1250	1070	1079
TRINITY_DN626_c0_g1_i7.p1	7	8	11	168	127	110	34	37	22
TRINITY_DN10249_c0_g1_i6.p2	21	54	50	247	220	123	50	55	33
TRINITY_DN14659_c0_g1_i2.p1	119	151	161	260	484	323	119	150	79
TRINITY_DN2043_c0_g1_i2.p1	0	0	0	903	3239	6835	6	4	0
TRINITY_DN487_c0_g1_i4.p3	42	92	34	244	207	105	81	28	24
TRINITY_DN4226_c0_g1_i2.p1	239	262	247	373	552	412	273	223	179
TRINITY_DN6396_c0_g1_i1.p1	59	78	78	384	453	614	155	211	149
TRINITY_DN35070_c0_g1_i1.p1	0	0	2	155	74	40	0	0	0
TRINITY_DN3606_c0_g2_i1.p1	111	218	189	8093	4531	3470	1788	1266	1227
TRINITY_DN4638_c0_g1_i4.p1	802	666	1069	3560	4111	1864	978	1475	1416
TRINITY_DN18860_c0_g5_i2.p1	14	49	40	1062	1270	2000	512	414	172
TRINITY_DN6548_c0_g1_i10.p2	106	347	244	1635	1906	2307	862	775	615
TRINITY_DN10507_c0_g1_i3.p1	49	58	51	166	138	198	49	45	64
TRINITY_DN1264_c0_g1_i10.p1	314	418	269	1814	2050	1131	933	915	737
TRINITY_DN791_c1_g2_i1.p1	20	20	32	262	257	116	48	34	43
TRINITY_DN28613_c0_g1_i4.p1	0	0	0	52	13	12	0	0	0
TRINITY_DN5293_c0_g1_i1.p1	419	530	599	1222	958	1594	578	609	522
TRINITY_DN17068_c0_g1_i1.p1	0	2	2	169	121	104	5	26	5
TRINITY_DN1969_c0_g1_i4.p1	4	18	25	147	205	131	60	46	25
TRINITY_DN23_c0_g2_i8.p1	409	433	384	1171	1669	1043	729	501	468
TRINITY_DN1077_c0_g1_i1.p2	305	278	216	1623	1084	511	453	430	381
TRINITY_DN4968_c0_g2_i3.p1	30	11	28	117	88	41	17	5	12
TRINITY_DN16086_c0_g1_i11.p1	133	147	171	576	429	428	230	223	229
TRINITY_DN12178_c0_g1_i2.p1	228	618	418	1248	1289	1533	717	416	602
TRINITY_DN58645_c0_g1_i4.p2	2	3	1	102	51	114	21	26	26
TRINITY_DN6468_c0_g1_i1.p1	82	199	181	945	762	856	337	104	155
TRINITY_DN5465_c0_g1_i2.p1	370	396	537	1093	1150	1196	533	585	422
TRINITY_DN1966_c0_g1_i1.p1	169	217	327	544	350	628	101	175	259
TRINITY_DN4890_c3_g1_i1.p1	2	13	9	431	621	590	96	111	16
TRINITY_DN3524_c0_g1_i9.p1	84	288	204	1204	1016	869	484	470	480
TRINITY_DN74933_c1_g1_i1.p1	0	0	0	15	18	8	0	0	0
TRINITY_DN4923_c0_g1_i7.p1	943	948	977	4863	3874	2957	1915	2385	1812
TRINITY_DN103813_c0_g1_i1.p1	0	0	0	36	6	14	0	0	0
TRINITY_DN22908_c0_g1_i2.p1	10	59	28	156	187	170	49	88	87
TRINITY_DN401_c0_g1_i3.p1	27	106	76	1429	2369	587	147	201	422
TRINITY_DN1851_c0_g3_i2.p1	5	14	4	105	232	124	14	9	3
TRINITY_DN295_c0_g1_i5.p1	175	268	252	1311	1503	1194	684	496	413
TRINITY_DN1425_c0_g1_i5.p1	377	323	307	1998	1709	1505	984	825	842
TRINITY_DN54_c4_g3_i2.p1	57	44	42	182	150	173	66	42	61
TRINITY_DN21019_c0_g1_i2.p1	0	0	0	217	45	36	0	0	0
TRINITY_DN14741_c0_g1_i3.p1	0	0	0	67	8	27	0	0	0
TRINITY_DN165928_c0_g1_i1.p3	0	0	0	5	41	16	0	0	0
TRINITY_DN15738_c0_g1_i5.p1	4	12	5	37	33	28	8	5	8
TRINITY_DN15738_c0_g1_i1.p1	3	11	3	37	38	28	4	4	8
TRINITY_DN2336_c0_g1_i2.p1	10	11	22	59	39	68	0	0	0
TRINITY_DN1620_c0_g1_i5.p2	16	26	41	322	349	319	57	125	51
TRINITY_DN1620_c0_g1_i5.p1	11	17	30	217	311	206	37	81	33
TRINITY_DN2837_c0_g1_i3.p2	403	281	268	845	783	685	419	386	377
TRINITY_DN8261_c0_g1_i7.p1	497	607	549	2218	2341	588	682	648	525
TRINITY_DN3068_c0_g1_i18.p2	56	66	61	116	182	95	29	47	27
TRINITY_DN4051_c0_g2_i10.p1	62	55	65	168	156	141	42	94	49
TRINITY_DN6797_c0_g1_i2.p1	1392	1421	885	3631	3240	2050	1211	1327	1211
TRINITY_DN3320_c0_g1_i1.p1	104	125	173	928	764	1193	345	425	283
TRINITY_DN24574_c1_g1_i2.p3	0	20	17	129	151	69	21	35	26
TRINITY_DN10137_c0_g2_i1.p1	261	737	564	3378	3876	3312	2061	1560	1664
TRINITY_DN4590_c0_g1_i14.p1	107	207	105	783	568	377	189	226	243
TRINITY_DN3464_c0_g1_i4.p2	11	18	6	250	428	197	107	49	35
TRINITY_DN4295_c0_g1_i1.p1	460	418	565	3977	3214	3013	845	1314	844
TRINITY_DN5204_c0_g1_i1.p1	22	23	8	118	88	63	17	13	21
TRINITY_DN11769_c0_g1_i1.p1	81	43	89	433	301	124	34	110	68
TRINITY_DN396_c0_g1_i3.p1	45	67	79	454	336	470	146	123	65
TRINITY_DN1503_c1_g2_i1.p1	821	852	699	10232	17961	10132	1923	1625	1423
TRINITY_DN27978_c0_g1_i1.p1	0	0	0	27	5	16	0	0	0
TRINITY_DN11477_c0_g1_i1.p1	82	147	239	1527	2366	1678	474	814	697
TRINITY_DN2949_c0_g1_i3.p1	73	51	99	252	196	89	54	87	61
TRINITY_DN1888_c0_g2_i3.p2	0	0	0	124	142	66	14	5	2
TRINITY_DN2541_c0_g1_i2.p1	30	40	34	203	152	88	19	24	36
TRINITY_DN16154_c0_g1_i2.p1	19	42	70	247	165	102	46	31	10
TRINITY_DN5292_c0_g1_i1.p1	0	2	0	709	895	560	46	12	9
TRINITY_DN396_c0_g1_i5.p1	38	69	76	466	350	470	152	121	79
TRINITY_DN4915_c0_g2_i10.p1	167	138	175	456	425	221	183	195	203
TRINITY_DN1888_c0_g2_i3.p3	4	0	0	259	217	71	20	7	3
TRINITY_DN406_c0_g1_i20.p1	346	368	521	1904	1521	782	459	607	580
TRINITY_DN39160_c0_g2_i5.p1	0	0	0	17	5	33	0	0	0
TRINITY_DN1679_c0_g1_i10.p1	76	101	189	431	434	303	162	104	146
TRINITY_DN19999_c0_g1_i4.p1	3	6	9	300	126	290	21	47	25
TRINITY_DN2934_c0_g1_i7.p1	8	7	8	126	400	171	40	67	31
TRINITY_DN5941_c0_g3_i3.p1	7	10	17	430	475	401	174	56	65
TRINITY_DN1829_c0_g1_i5.p1	200	175	158	755	838	411	362	357	301
TRINITY_DN5881_c0_g1_i1.p1	302	348	291	597	775	646	302	452	372
TRINITY_DN7906_c0_g1_i3.p1	0	0	0	99	173	198	49	24	6
TRINITY_DN16238_c0_g1_i4.p1	0	0	0	123	56	34	14	9	4
TRINITY_DN15517_c0_g1_i3.p1	0	6	3	490	314	363	27	48	26
TRINITY_DN25276_c0_g1_i5.p1	212	264	344	552	481	546	296	298	274
TRINITY_DN20307_c0_g1_i2.p1	0	3	8	55	29	60	1	1	7
TRINITY_DN22700_c0_g3_i1.p2	0	0	0	199	51	93	0	0	0
TRINITY_DN40606_c0_g1_i1.p1	0	0	0	43	82	40	16	5	8
TRINITY_DN9467_c0_g1_i3.p1	47	0	108	727	992	972	69	0	86
TRINITY_DN9467_c0_g1_i3.p3	51	94	118	881	1262	1103	85	227	97
TRINITY_DN3576_c0_g1_i11.p1	0	0	0	26	31	16	0	0	0
TRINITY_DN9467_c0_g1_i7.p1	34	36	84	626	956	891	73	87	72
TRINITY_DN9467_c0_g1_i7.p3	38	40	110	827	1194	1094	82	121	92
TRINITY_DN37049_c0_g1_i1.p1	0	0	0	56	11	15	0	2	0
TRINITY_DN3345_c2_g1_i9.p1	247	287	280	722	654	290	298	282	267
TRINITY_DN6393_c0_g1_i6.p1	0	0	0	45	42	74	0	0	0
TRINITY_DN666_c0_g2_i1.p1	6	2	3	279	235	70	6	11	7
TRINITY_DN21103_c0_g1_i7.p2	0	0	0	106	18	2	0	0	0
TRINITY_DN70991_c0_g1_i1.p1	0	0	0	27	33	27	2	4	6
TRINITY_DN6373_c0_g1_i2.p1	18	32	15	555	469	525	238	150	129
TRINITY_DN7856_c0_g2_i3.p1	830	859	576	19819	18165	21975	9489	6819	7320
TRINITY_DN23_c0_g1_i5.p1	493	520	461	1326	1699	1157	482	363	383
TRINITY_DN918_c1_g2_i1.p1	70	89	51	369	379	141	77	131	70
TRINITY_DN3873_c0_g1_i10.p1	3	44	9	333	329	228	62	74	133
TRINITY_DN5912_c0_g1_i6.p2	9	3	4	461	465	198	89	135	58
TRINITY_DN5912_c0_g1_i6.p1	8	2	0	418	401	176	73	92	50
TRINITY_DN820_c0_g1_i10.p1	49	44	42	295	292	297	149	130	109
TRINITY_DN484_c0_g1_i4.p1	0	0	0	141	0	43	0	0	0
TRINITY_DN1441_c0_g1_i18.p2	0	0	4	391	248	111	1	1	2
TRINITY_DN1441_c0_g1_i18.p1	0	0	0	341	234	94	0	0	2
TRINITY_DN34078_c0_g1_i3.p1	127	78	209	471	253	439	19	29	59
TRINITY_DN35659_c0_g1_i1.p1	0	0	0	331	51	41	0	0	0
TRINITY_DN2759_c0_g1_i27.p2	5	9	6	69	101	50	28	16	29
TRINITY_DN2759_c0_g1_i27.p1	5	9	6	69	101	50	28	16	29
TRINITY_DN11847_c0_g1_i1.p1	2	0	15	208	217	147	82	16	38
TRINITY_DN3873_c0_g1_i12.p1	4	59	7	369	293	207	60	98	121
TRINITY_DN3553_c0_g3_i1.p1	1440	1970	2016	4642	4800	6179	3061	2303	2370
TRINITY_DN37499_c0_g1_i8.p1	245	270	296	510	585	552	263	288	303
TRINITY_DN25008_c0_g1_i1.p1	0	0	0	47	62	40	0	0	0
TRINITY_DN1441_c0_g1_i12.p1	0	0	0	260	139	51	0	0	2
TRINITY_DN1441_c0_g1_i12.p2	1	0	1	278	150	62	1	1	2
TRINITY_DN15083_c0_g1_i3.p1	1	2	0	104	79	19	0	0	1
TRINITY_DN1758_c0_g3_i4.p5	68	63	89	2826	2562	1779	1136	493	236
TRINITY_DN11219_c0_g1_i1.p2	26	43	51	111	108	84	42	34	47
TRINITY_DN10249_c0_g1_i4.p1	21	77	63	394	398	175	40	27	40
TRINITY_DN2484_c0_g2_i2.p1	3247	4299	4974	36501	33728	29623	15264	13033	14244
TRINITY_DN20248_c1_g1_i2.p1	1203	1255	2323	3708	3356	3188	1721	1683	1440
TRINITY_DN1325_c0_g1_i22.p1	197	120	173	585	1196	496	362	197	248
TRINITY_DN33494_c0_g1_i2.p1	19	11	32	437	473	149	15	37	20
TRINITY_DN13389_c0_g1_i1.p1	3	95	35	1040	1007	486	7	0	16
TRINITY_DN1626_c0_g1_i8.p1	308	290	228	1695	1341	1192	508	738	600
TRINITY_DN9845_c0_g1_i4.p1	2	0	10	68	86	35	9	21	17
TRINITY_DN12125_c0_g1_i3.p1	0	0	0	0	163	27	0	0	0
TRINITY_DN1825_c0_g1_i3.p1	75	96	116	2462	1777	3065	218	250	161
TRINITY_DN1709_c0_g2_i2.p1	23	28	14	238	142	95	17	20	23
TRINITY_DN3702_c0_g1_i17.p1	31	53	108	252	296	402	39	85	93
TRINITY_DN23135_c0_g1_i1.p1	0	0	0	163	47	23	0	0	1
TRINITY_DN7684_c0_g1_i1.p1	181	174	213	929	807	527	295	279	264
TRINITY_DN2068_c0_g1_i4.p1	214	179	272	1163	1282	1314	305	754	448
TRINITY_DN1551_c0_g2_i3.p1	12	25	34	543	394	277	128	131	221
TRINITY_DN26492_c0_g1_i3.p1	0	0	0	72	61	28	5	0	0
TRINITY_DN573_c1_g2_i1.p2	2237	872	935	7250	8498	2347	2299	1267	2380
TRINITY_DN39870_c0_g1_i1.p2	0	0	0	2	35	29	0	0	0
TRINITY_DN9789_c0_g1_i7.p1	5	15	12	142	112	58	17	38	11
TRINITY_DN14290_c0_g1_i2.p1	39	79	51	302	252	111	67	103	94
TRINITY_DN26009_c0_g1_i2.p4	0	0	0	156	65	6	0	0	0
TRINITY_DN3772_c0_g1_i6.p1	0	0	0	179	248	64	0	1	0
TRINITY_DN2441_c0_g1_i1.p1	12	4	12	304	698	1675	185	132	63
TRINITY_DN9788_c1_g1_i3.p1	0	0	0	82	46	36	0	0	0
TRINITY_DN3536_c0_g1_i2.p1	85	58	91	1314	1170	394	320	114	197
TRINITY_DN119483_c0_g1_i1.p1	0	0	0	124	266	126	0	0	19
TRINITY_DN1303_c0_g1_i3.p1	1491	2812	3049	11880	10700	11606	3807	4495	5267
TRINITY_DN9961_c0_g1_i4.p1	66	152	165	1720	800	851	142	280	206
TRINITY_DN13940_c0_g1_i1.p1	19	48	57	158	123	142	15	33	22
TRINITY_DN2714_c0_g1_i4.p1	1415	2331	2397	10709	11580	15849	3237	2990	2833
TRINITY_DN36458_c0_g1_i1.p1	0	0	0	7	30	56	0	0	0
TRINITY_DN2180_c0_g2_i3.p1	204	156	196	455	358	436	222	238	226
TRINITY_DN21528_c1_g1_i1.p1	0	0	0	30	21	109	0	0	0
TRINITY_DN17923_c0_g1_i1.p1	9	85	56	1963	2767	783	165	218	173
TRINITY_DN16384_c0_g1_i6.p1	62	84	113	343	496	608	195	161	196
TRINITY_DN8323_c0_g1_i3.p1	262	246	247	636	493	487	245	294	242
TRINITY_DN991_c0_g1_i9.p1	387	550	684	1812	1720	1611	807	1112	720
TRINITY_DN1970_c0_g1_i2.p1	0	20	16	667	668	229	70	15	7
TRINITY_DN8323_c0_g1_i7.p1	310	376	326	840	552	562	344	384	358
TRINITY_DN8261_c0_g1_i5.p1	489	622	557	2218	2383	603	694	687	522
TRINITY_DN1773_c2_g2_i2.p1	0	0	0	433	301	96	4	8	8
TRINITY_DN2895_c0_g1_i8.p1	119	136	152	626	609	487	322	322	313
TRINITY_DN13980_c0_g1_i6.p3	0	3	5	239	170	9	7	9	13
TRINITY_DN4448_c0_g1_i2.p1	95	120	179	634	547	499	183	297	185
TRINITY_DN2665_c0_g1_i1.p1	1320	1694	434	10529	9310	3033	3123	1362	1214
TRINITY_DN21766_c0_g1_i4.p1	16	245	21	1836	1976	5481	232	81	112
TRINITY_DN2874_c0_g1_i13.p1	91	101	51	805	739	535	327	224	177
TRINITY_DN9261_c0_g1_i2.p1	148	201	226	726	1144	986	398	330	219
TRINITY_DN2489_c0_g2_i3.p2	3	16	3	721	323	158	73	8	4
TRINITY_DN2759_c0_g1_i27.p3	5	9	6	69	101	50	28	16	29
TRINITY_DN2016_c0_g1_i2.p1	519	667	846	4696	3685	3244	1958	2053	1754
TRINITY_DN3464_c0_g1_i8.p2	11	19	13	297	447	246	121	54	48
TRINITY_DN4042_c0_g2_i1.p1	575	506	326	2809	2418	1951	772	850	483
TRINITY_DN5292_c0_g1_i4.p1	0	2	0	479	577	444	29	9	10
TRINITY_DN2663_c1_g1_i2.p2	12	20	20	553	618	306	122	82	143
TRINITY_DN2663_c1_g1_i2.p1	9	15	14	496	350	225	96	63	128
TRINITY_DN754_c0_g1_i3.p1	75	91	106	304	254	190	105	119	96
TRINITY_DN2874_c0_g1_i16.p1	66	74	48	739	600	461	309	181	132
TRINITY_DN5293_c0_g1_i6.p1	298	370	416	776	638	1102	374	376	336
TRINITY_DN4046_c0_g2_i1.p1	0	0	0	425	348	270	3	0	4
TRINITY_DN2143_c0_g1_i3.p1	5	29	64	1727	1248	1531	250	231	221
TRINITY_DN346_c1_g1_i1.p1	2882	4631	5285	11117	12239	15630	6580	5649	4969
TRINITY_DN24761_c0_g1_i8.p1	46	8	14	214	171	210	88	41	33
TRINITY_DN24761_c0_g1_i8.p2	46	8	14	214	171	210	88	41	33
TRINITY_DN24761_c0_g1_i8.p3	46	8	14	214	171	210	88	41	33
TRINITY_DN30102_c0_g1_i1.p2	0	0	8	217	255	100	6	0	0
TRINITY_DN11896_c0_g1_i4.p1	5	2	1	419	448	226	5	14	18
TRINITY_DN552_c0_g1_i9.p3	0	0	0	16	17	18	0	0	0
TRINITY_DN1679_c0_g1_i2.p1	74	75	186	403	388	190	121	92	145
TRINITY_DN641_c0_g2_i1.p1	30	49	35	893	784	402	71	93	49
TRINITY_DN2880_c0_g2_i7.p1	43	56	40	572	681	730	354	299	184
TRINITY_DN4909_c0_g1_i8.p1	1799	1179	918	5342	6189	4198	3348	3049	2154
TRINITY_DN37706_c0_g1_i1.p1	0	0	0	1083	1893	6308	626	415	42
TRINITY_DN3324_c0_g1_i1.p1	30	32	21	135	105	55	36	26	18
TRINITY_DN3177_c0_g1_i3.p2	2	0	6	340	218	199	32	24	17
TRINITY_DN3198_c0_g1_i2.p1	6167	8542	9110	21499	36831	38531	14925	14710	13119
TRINITY_DN966_c0_g2_i2.p1	20	66	71	997	1123	1342	208	220	292
TRINITY_DN16086_c0_g1_i6.p1	140	152	173	569	437	414	232	225	230
TRINITY_DN1713_c0_g1_i7.p1	23	34	31	339	333	186	34	55	83
TRINITY_DN2874_c0_g1_i20.p1	89	99	64	843	747	605	343	206	185
TRINITY_DN8536_c0_g1_i9.p1	181	212	273	3297	3677	7956	1032	1184	665
TRINITY_DN9484_c1_g1_i1.p1	1	1	1	461	598	982	26	28	15
TRINITY_DN9484_c1_g1_i1.p2	1	1	1	461	598	982	26	28	15
TRINITY_DN1668_c0_g1_i6.p1	96	88	102	333	230	216	78	136	147
TRINITY_DN1972_c0_g1_i1.p1	0	10	14	727	310	238	67	12	7
TRINITY_DN21103_c0_g1_i1.p3	0	0	0	158	26	2	0	0	0
TRINITY_DN6566_c0_g1_i3.p1	63	179	162	3267	2823	2517	1432	1329	1439
TRINITY_DN8172_c0_g1_i3.p1	0	2	0	57524	75363	105135	1	0	5
TRINITY_DN8172_c0_g1_i3.p2	0	2	27	60373	77979	107938	1	2	6
TRINITY_DN215_c1_g1_i10.p1	214	251	219	1086	1112	548	539	305	246
TRINITY_DN8172_c0_g1_i7.p1	0	3	29	98831	131650	187527	6	2	15
TRINITY_DN7471_c0_g1_i3.p1	175	238	204	666	667	478	390	290	248
TRINITY_DN4545_c0_g1_i2.p1	391	931	799	2087	1330	1764	609	738	758
TRINITY_DN9429_c0_g1_i5.p1	0	0	0	545	418	101	0	0	0
TRINITY_DN12267_c0_g1_i2.p1	9	41	20	880	1046	801	241	64	63
TRINITY_DN6734_c0_g1_i8.p2	7	2	6	151	162	55	49	31	35
TRINITY_DN11413_c0_g1_i7.p1	84	120	137	802	797	1689	310	184	74
TRINITY_DN1109_c0_g2_i2.p1	6	4	15	137	253	151	1	0	3
TRINITY_DN38355_c0_g1_i3.p1	52	91	32	469	343	305	147	100	28
TRINITY_DN565_c0_g2_i3.p1	3597	4336	5226	9949	8315	6796	2953	5155	5078
TRINITY_DN1321_c0_g1_i2.p1	75	141	97	242	278	400	85	45	88
TRINITY_DN26472_c1_g1_i2.p1	0	0	0	28	54	90	9	6	2
TRINITY_DN10485_c0_g1_i1.p2	0	5	0	171	81	133	4	2	0
TRINITY_DN5302_c0_g2_i10.p2	195	112	114	390	406	264	199	156	171
TRINITY_DN7115_c0_g4_i2.p1	46	59	103	206	245	201	55	131	90
TRINITY_DN8462_c0_g1_i2.p1	130	119	180	750	767	337	180	209	226
TRINITY_DN5293_c0_g3_i4.p1	433	578	656	1393	1079	1829	671	634	605
TRINITY_DN2386_c1_g1_i2.p1	11	10	11	109	137	110	22	25	24
TRINITY_DN2386_c1_g1_i2.p3	11	10	11	109	137	110	22	25	24
TRINITY_DN2386_c1_g1_i2.p2	11	10	11	109	137	110	22	25	24
TRINITY_DN85557_c0_g1_i1.p1	2	0	0	28	25	10	0	0	0
TRINITY_DN24452_c0_g1_i1.p1	1353	1376	1605	3691	3366	3268	1694	2190	1551
TRINITY_DN15822_c0_g4_i2.p1	18	33	111	190	199	175	83	88	108
TRINITY_DN1_c1_g1_i2.p1	294	232	435	706	736	610	304	337	420
TRINITY_DN33909_c0_g3_i1.p1	1	0	0	55	43	37	2	0	5
TRINITY_DN47894_c1_g1_i1.p1	0	0	0	41	16	4	0	0	0
TRINITY_DN7488_c0_g1_i2.p1	128	93	123	361	251	149	77	83	102
TRINITY_DN10485_c0_g1_i12.p2	0	0	0	81	17	18	1	0	0
TRINITY_DN10435_c0_g1_i8.p1	4	51	25	82	445	609	50	49	33
TRINITY_DN5257_c0_g1_i2.p1	0	10	2	307	188	232	99	47	55
TRINITY_DN1218_c0_g1_i2.p1	285	320	300	708	637	562	396	275	183
TRINITY_DN1156_c0_g1_i15.p2	182	105	116	315	309	209	131	155	128
TRINITY_DN3702_c0_g1_i11.p1	112	161	164	728	1258	1250	198	243	322
TRINITY_DN3062_c1_g2_i1.p1	1054	1114	1437	5930	4776	4922	3048	2575	2425
TRINITY_DN616_c1_g3_i1.p1	111	121	134	270	282	169	112	149	132
TRINITY_DN628_c0_g1_i5.p1	915	1134	1432	2672	4220	5857	1076	1319	1168
TRINITY_DN1325_c0_g1_i21.p1	178	124	163	541	1199	481	365	194	249
TRINITY_DN1151_c0_g1_i6.p1	111	149	244	326	498	338	135	120	189
TRINITY_DN33775_c0_g2_i2.p1	0	0	0	122	100	21	9	1	1
TRINITY_DN6971_c0_g1_i1.p1	93	230	234	1639	1452	2021	442	527	364
TRINITY_DN2441_c0_g1_i3.p1	96	132	198	618	932	1410	287	299	243
TRINITY_DN9615_c0_g1_i3.p1	20	19	29	102	206	81	32	16	48
TRINITY_DN9788_c1_g1_i1.p1	0	0	0	64	29	31	0	0	0
TRINITY_DN13928_c0_g2_i1.p1	1183	1636	1760	3446	3231	3041	1471	1755	1780
TRINITY_DN641_c0_g1_i3.p1	103	100	124	344	463	274	67	82	85
TRINITY_DN54794_c0_g1_i2.p1	15	6	32	81	72	76	13	30	13
TRINITY_DN30063_c0_g1_i1.p1	0	0	0	41	32	54	0	0	0
TRINITY_DN4638_c0_g1_i9.p4	150	122	136	883	959	428	358	301	277
TRINITY_DN8646_c0_g1_i4.p1	0	0	0	102	64	49	4	0	2
TRINITY_DN637_c0_g1_i2.p1	857	556	1020	2786	2597	3669	1503	896	862
TRINITY_DN637_c0_g2_i3.p1	147	119	143	348	386	719	218	112	111
TRINITY_DN55636_c0_g1_i5.p1	0	9	19	1898	1074	1535	133	120	47
TRINITY_DN1792_c2_g3_i3.p1	10	11	19	101	91	43	14	18	10
TRINITY_DN215_c0_g1_i1.p1	1651	2302	1319	4343	4011	3723	1225	1530	1603
TRINITY_DN1897_c0_g1_i1.p1	14	35	25	129	85	121	38	28	50
TRINITY_DN414_c0_g3_i14.p2	83	52	59	180	208	99	55	68	49
TRINITY_DN414_c0_g3_i14.p1	70	43	53	158	185	78	46	60	40
TRINITY_DN123507_c0_g1_i1.p1	541	522	657	2202	1784	1813	1125	960	889
TRINITY_DN9261_c0_g1_i1.p1	92	125	184	432	741	728	310	258	204
TRINITY_DN121903_c0_g1_i1.p1	6	3	3	730	937	805	175	49	8
TRINITY_DN2413_c0_g2_i2.p1	6052	6522	8328	21635	16646	16660	7865	11232	10103
TRINITY_DN16397_c0_g1_i1.p1	0	8	0	89	35	50	0	3	3
TRINITY_DN44452_c0_g1_i2.p1	0	0	0	21	21	36	0	0	0
TRINITY_DN8409_c0_g3_i1.p1	13	17	14	42	53	44	14	9	10
TRINITY_DN3898_c0_g2_i1.p3	4	39	15	1727	1830	548	167	293	281
TRINITY_DN3256_c0_g1_i13.p2	171	151	221	654	581	330	189	258	194
TRINITY_DN3256_c0_g1_i13.p3	184	158	241	694	625	388	181	260	203
TRINITY_DN3256_c0_g1_i13.p1	161	170	209	629	561	281	241	300	207
TRINITY_DN2464_c0_g1_i17.p1	245	252	592	2225	2171	1544	1038	952	967
TRINITY_DN63141_c0_g1_i1.p2	13	12	6	46	43	33	6	9	7
TRINITY_DN17068_c0_g1_i2.p1	0	9	2	99	42	59	0	4	9
TRINITY_DN4486_c0_g1_i5.p1	52	27	35	170	441	218	103	120	76
TRINITY_DN357_c1_g2_i3.p1	26	38	62	221	208	287	50	107	68
TRINITY_DN1841_c0_g1_i4.p1	354	309	538	1413	1697	1122	773	585	355
TRINITY_DN5344_c0_g1_i1.p1	133	465	219	2280	1436	906	680	590	698
TRINITY_DN401_c0_g1_i2.p1	782	2718	1615	6461	10274	3175	1900	2081	3402
TRINITY_DN820_c0_g1_i21.p1	31	44	31	299	250	251	94	130	94
TRINITY_DN1762_c1_g1_i3.p1	154	302	203	2357	1657	1682	1022	667	594
TRINITY_DN1077_c0_g1_i4.p2	228	211	162	1145	717	325	283	288	290
TRINITY_DN4042_c1_g7_i1.p1	323	336	328	3613	3423	5374	1553	984	621
TRINITY_DN6142_c0_g4_i2.p1	417	539	707	2732	3454	4371	327	360	382
TRINITY_DN24867_c0_g1_i5.p1	0	0	8	116	98	75	3	0	5
TRINITY_DN1867_c0_g1_i6.p1	47	58	58	168	184	144	63	75	107
TRINITY_DN1713_c0_g1_i5.p1	24	27	40	311	272	175	23	40	56
TRINITY_DN3324_c0_g1_i3.p1	53	59	66	246	254	144	88	70	51
TRINITY_DN18889_c0_g1_i1.p1	7	38	50	1437	1105	825	66	71	116
TRINITY_DN6456_c2_g1_i1.p1	0	0	0	1004	918	825	5	27	0
TRINITY_DN5137_c1_g1_i2.p1	204	529	289	3959	2136	918	471	727	870
TRINITY_DN24184_c0_g1_i7.p1	3	2	12	88	38	63	6	17	9
TRINITY_DN56223_c0_g2_i1.p1	0	9	11	244	178	189	7	0	4
TRINITY_DN3471_c0_g1_i3.p1	13	8	7	2112	2785	5272	190	97	54
TRINITY_DN11852_c2_g1_i2.p1	10	19	34	268	206	40	0	9	11
TRINITY_DN2431_c0_g2_i2.p1	0	4	0	744	898	198	13	8	15
TRINITY_DN1086_c0_g1_i3.p1	44	61	109	410	582	588	260	265	264
TRINITY_DN36_c0_g1_i7.p2	245	330	289	386	736	849	141	241	253
TRINITY_DN2103_c1_g1_i2.p1	63	42	63	149	154	74	0	0	0
TRINITY_DN10195_c0_g1_i2.p2	11	44	42	231	532	98	43	19	23
TRINITY_DN10195_c0_g1_i2.p1	11	38	34	195	489	87	43	19	21
TRINITY_DN4638_c0_g1_i5.p5	131	108	149	860	896	367	315	276	256
TRINITY_DN1668_c0_g1_i6.p2	111	122	149	464	339	287	125	187	217
TRINITY_DN33101_c0_g1_i8.p1	1	0	0	109	53	23	0	2	2
TRINITY_DN15083_c0_g2_i1.p1	0	0	0	489	908	991	5	16	44
TRINITY_DN3307_c0_g1_i3.p1	144	74	59	691	327	257	150	171	88
TRINITY_DN20275_c0_g1_i13.p2	5	3	11	125	100	42	29	9	7
TRINITY_DN20275_c0_g1_i13.p1	4	2	8	109	78	34	23	7	6
TRINITY_DN6884_c0_g1_i14.p1	140	175	232	447	395	356	112	137	134
TRINITY_DN14082_c0_g1_i7.p1	174	180	190	288	305	346	114	126	130
TRINITY_DN1479_c0_g1_i7.p2	109	44	79	248	258	129	82	72	108
TRINITY_DN2387_c0_g1_i7.p1	0	0	0	9941	4774	5808	0	0	5
TRINITY_DN34407_c0_g2_i1.p1	71	143	109	1133	1707	1320	441	298	519
TRINITY_DN12730_c0_g1_i3.p1	51	52	66	307	328	379	106	99	120
TRINITY_DN3873_c0_g1_i5.p1	8	126	17	588	493	300	81	104	186
TRINITY_DN29179_c0_g1_i1.p1	141	144	350	3638	4364	1408	1093	1418	1172
TRINITY_DN1779_c1_g1_i5.p1	15	12	26	119	135	121	14	6	20
TRINITY_DN17842_c0_g1_i4.p1	11	10	12	162	66	28	9	0	4
TRINITY_DN23483_c0_g1_i4.p1	0	6	0	15	79	71	2	2	0
TRINITY_DN3926_c0_g1_i1.p1	0	0	0	314	73	72	14	17	12
TRINITY_DN50064_c0_g1_i1.p1	0	0	0	52	13	93	0	2	2
TRINITY_DN8953_c1_g2_i1.p3	19	36	35	478	348	83	58	12	25
TRINITY_DN215_c1_g1_i4.p1	332	359	295	977	1090	477	484	330	239
TRINITY_DN7808_c0_g1_i6.p2	0	0	0	0	0	65	0	0	0
TRINITY_DN5649_c0_g4_i1.p1	0	0	0	203	137	154	0	0	0
TRINITY_DN9110_c0_g2_i2.p1	5	22	26	124	197	104	22	18	60
TRINITY_DN22700_c0_g1_i1.p1	0	0	0	206	10	97	0	0	0
TRINITY_DN3524_c0_g1_i12.p1	59	140	118	608	499	454	269	283	239
TRINITY_DN12116_c0_g1_i1.p1	143	136	166	768	1141	1038	504	311	234
TRINITY_DN79696_c0_g1_i1.p1	0	0	0	11	144	35	0	0	0
TRINITY_DN16840_c0_g1_i3.p1	12	53	48	181	222	85	33	50	45
TRINITY_DN5744_c0_g1_i2.p1	3	4	3	598	1247	3233	169	108	27
TRINITY_DN11309_c0_g1_i1.p1	452	746	439	1128	1702	690	211	183	185
TRINITY_DN170_c0_g2_i7.p3	25	20	9	433	305	43	33	45	23
TRINITY_DN20685_c0_g1_i1.p1	4	8	18	137	86	27	13	4	13
TRINITY_DN5694_c0_g1_i5.p1	181	276	337	4737	6679	7292	1892	1844	2235
TRINITY_DN8172_c0_g1_i5.p1	0	2	14	68118	87712	123544	1	0	4
TRINITY_DN5008_c0_g1_i2.p1	0	6	6	77	93	79	32	34	38
TRINITY_DN20738_c0_g1_i5.p2	10	14	34	116	221	85	35	24	33
TRINITY_DN35933_c0_g1_i5.p1	103	92	155	286	379	306	115	188	146
TRINITY_DN5980_c0_g1_i2.p1	13	0	4	391	336	447	37	34	14
TRINITY_DN1713_c0_g1_i1.p1	24	27	34	280	293	154	31	44	82
TRINITY_DN62952_c0_g1_i1.p2	997	1071	1264	2147	1759	1833	863	1193	1063
TRINITY_DN1370_c0_g1_i11.p1	2	17	7	401	744	326	143	32	13
TRINITY_DN1370_c0_g1_i11.p2	3	23	10	442	881	368	160	38	17
TRINITY_DN33101_c0_g1_i10.p2	0	0	1	70	46	34	1	2	1
TRINITY_DN8906_c0_g1_i2.p1	27	134	128	302	5867	389	149	9	23
TRINITY_DN6538_c1_g2_i1.p1	8425	8499	7876	46185	36755	29834	17152	16558	11427
TRINITY_DN9705_c0_g1_i3.p1	41	31	57	217	326	375	82	155	68
TRINITY_DN4043_c0_g1_i8.p1	6442	5937	4934	12770	13276	14154	8065	7310	7145
TRINITY_DN22974_c0_g1_i1.p1	34	11	18	125	113	31	10	15	16
TRINITY_DN17749_c0_g1_i2.p1	5	28	27	164	342	82	22	12	31
TRINITY_DN14215_c0_g1_i1.p1	54	33	66	181	711	344	50	84	103
TRINITY_DN52762_c0_g2_i6.p1	0	0	0	88	20	24	0	0	0
TRINITY_DN641_c0_g1_i1.p1	427	449	527	1303	1816	793	261	445	314
TRINITY_DN8222_c0_g1_i3.p1	1	14	9	154	173	39	3	7	20
TRINITY_DN21121_c0_g1_i4.p1	0	4	5	87	70	39	7	13	14
TRINITY_DN1321_c0_g1_i3.p1	31	53	33	101	132	173	36	14	50
TRINITY_DN4137_c0_g1_i13.p1	122	140	114	676	376	122	69	120	110
TRINITY_DN1316_c0_g1_i4.p1	335	350	340	1599	1020	630	478	587	509
TRINITY_DN35367_c0_g1_i1.p1	45	56	74	191	215	167	79	84	100
TRINITY_DN18570_c0_g1_i4.p2	0	0	0	219	172	36	0	0	0
TRINITY_DN396_c0_g1_i16.p2	79	119	67	240	208	273	113	81	56
TRINITY_DN4486_c0_g1_i16.p1	54	20	40	99	207	73	32	26	12
TRINITY_DN4401_c0_g3_i2.p1	24	33	98	1078	803	1069	158	339	247
TRINITY_DN3170_c0_g1_i2.p2	7	17	26	1092	409	276	74	187	170
TRINITY_DN1939_c0_g1_i3.p1	333	274	445	753	667	592	315	339	412
TRINITY_DN16086_c0_g1_i14.p2	0	6	6	123	142	54	15	14	12
TRINITY_DN6332_c1_g1_i4.p1	41	48	88	227	223	203	108	130	120
TRINITY_DN48_c0_g1_i3.p1	192	339	318	812	720	530	342	354	397
TRINITY_DN5663_c0_g1_i3.p2	36	56	115	899	910	740	489	352	494
TRINITY_DN17518_c0_g1_i3.p1	36	21	27	247	392	419	21	24	25
TRINITY_DN6884_c0_g1_i15.p1	126	130	164	323	287	258	120	154	136
TRINITY_DN48605_c0_g3_i2.p1	0	0	0	56	23	2	0	0	0
TRINITY_DN7799_c0_g2_i1.p1	14	25	54	162	110	135	20	42	12
TRINITY_DN41159_c0_g1_i2.p1	0	1	7	60	41	26	8	9	4
TRINITY_DN1441_c0_g1_i8.p1	0	0	0	270	187	66	0	0	1
TRINITY_DN1441_c0_g1_i8.p2	1	0	1	307	211	73	1	0	2
TRINITY_DN6766_c0_g1_i5.p1	64	83	80	145	215	213	14	44	42
TRINITY_DN17134_c0_g1_i2.p1	2	2	0	66	31	15	4	0	0
TRINITY_DN16091_c0_g1_i1.p1	0	0	0	171	13	13	0	0	0
TRINITY_DN21224_c0_g1_i3.p2	0	0	0	16	6	26	0	0	0
TRINITY_DN10507_c0_g1_i4.p1	71	94	45	186	166	200	48	64	71
TRINITY_DN770_c1_g1_i3.p2	79	140	138	250	331	476	78	119	117
TRINITY_DN33494_c0_g1_i1.p1	8	11	8	181	173	67	8	7	14
TRINITY_DN143290_c0_g1_i1.p1	0	0	0	49	48	7	0	0	3
TRINITY_DN7243_c0_g1_i10.p1	586	657	761	1308	1233	1324	319	570	605
TRINITY_DN15180_c0_g2_i3.p3	8	4	19	64	45	30	7	13	6
TRINITY_DN5293_c0_g1_i2.p1	374	495	580	1178	908	1582	575	550	479
TRINITY_DN2441_c0_g1_i2.p1	701	820	1125	3905	5377	9061	1858	1595	1272
TRINITY_DN1077_c0_g1_i2.p2	412	416	285	1903	1171	537	490	466	550
TRINITY_DN6131_c0_g1_i3.p1	1188	1279	1833	3282	2997	2270	1258	1774	1496
TRINITY_DN4794_c1_g1_i3.p1	55	63	75	1288	1381	1206	646	405	202
TRINITY_DN3561_c0_g3_i3.p1	97	88	85	396	237	221	143	118	110
TRINITY_DN3658_c0_g1_i2.p1	7	13	14	115	376	128	65	30	52
TRINITY_DN8409_c0_g3_i7.p2	23	20	22	43	97	46	15	18	12
TRINITY_DN11207_c0_g1_i3.p1	4999	4512	6658	34522	28806	39472	10044	7795	8634
TRINITY_DN5579_c0_g1_i3.p1	275	242	261	1808	1242	863	229	328	224
TRINITY_DN21318_c0_g1_i2.p1	0	0	4	164	74	38	1	1	0
TRINITY_DN2490_c0_g1_i2.p1	711	576	702	1542	1555	592	491	581	606
TRINITY_DN9480_c0_g1_i1.p1	1051	1035	1591	11945	8556	9309	1805	3266	2034
TRINITY_DN637_c0_g2_i2.p2	202	183	294	803	769	1271	270	209	201
TRINITY_DN5579_c0_g1_i5.p1	224	216	220	1401	1049	811	218	287	221
TRINITY_DN14038_c0_g1_i7.p1	45	47	46	337	213	50	37	16	14
TRINITY_DN5670_c0_g1_i1.p1	233	185	344	870	910	515	361	338	381
TRINITY_DN12150_c1_g2_i1.p1	0	0	2	151	148	43	39	22	18
TRINITY_DN4431_c1_g1_i5.p1	13	7	1	75	192	66	25	10	33
TRINITY_DN15874_c0_g1_i4.p2	2	0	2	76	71	26	11	10	13
TRINITY_DN2895_c0_g1_i7.p1	138	271	175	1261	1305	1398	581	522	569
TRINITY_DN62082_c0_g1_i1.p1	0	0	0	16	11	31	0	0	0
TRINITY_DN5989_c0_g3_i4.p2	0	0	0	137	124	223	0	0	0
TRINITY_DN3464_c0_g1_i15.p1	16	35	19	515	512	438	248	84	73
TRINITY_DN13713_c0_g1_i1.p1	0	2	3	271	191	164	62	47	12
TRINITY_DN1276_c0_g1_i1.p1	724	913	843	2231	2207	1963	918	1215	1055
TRINITY_DN4123_c0_g1_i5.p1	0	5	0	222	198	339	11	5	18
TRINITY_DN37955_c0_g2_i1.p2	0	0	0	18	73	21	5	3	4
TRINITY_DN16384_c0_g1_i3.p1	30	38	45	191	221	193	75	87	65
TRINITY_DN10766_c0_g1_i1.p1	0	0	0	78	132	57	0	0	0
TRINITY_DN157374_c0_g1_i1.p1	6	0	0	61	116	110	0	4	0
TRINITY_DN2759_c0_g1_i24.p1	17	31	26	240	366	147	80	52	100
TRINITY_DN21019_c0_g1_i3.p1	0	0	0	72	17	13	0	0	0
TRINITY_DN4272_c0_g1_i4.p1	0	0	0	3501	3393	0	0	0	0
TRINITY_DN2759_c0_g1_i28.p3	8	6	7	81	118	49	28	16	30
TRINITY_DN2759_c0_g1_i28.p2	8	6	7	81	118	49	28	16	30
TRINITY_DN2759_c0_g1_i28.p1	8	6	7	81	118	49	28	16	30
TRINITY_DN2387_c0_g1_i4.p1	1	4	4	22437	10358	11482	47	5	18
TRINITY_DN10123_c0_g1_i1.p1	663	1108	1291	1950	3240	1881	266	396	876
TRINITY_DN4566_c0_g1_i3.p2	239	173	245	925	1180	967	500	433	497
TRINITY_DN3873_c0_g1_i7.p2	4	120	25	512	508	200	51	62	107
TRINITY_DN5744_c0_g1_i14.p1	2	4	3	157	374	842	68	31	10
TRINITY_DN12990_c0_g1_i1.p1	0	0	6	128	109	53	19	8	24
TRINITY_DN3177_c0_g1_i6.p2	2	0	2	225	165	121	15	15	11
TRINITY_DN62200_c0_g1_i3.p1	0	0	0	40	21	22	0	0	0
TRINITY_DN1903_c0_g2_i6.p1	748	744	672	3605	3237	1689	1429	1577	1340
TRINITY_DN10137_c0_g2_i2.p1	247	705	546	3317	3764	3219	2037	1545	1655
TRINITY_DN9714_c0_g2_i1.p1	63	40	57	117	133	106	54	69	57
TRINITY_DN18618_c0_g3_i1.p1	0	0	0	185	245	138	26	26	76
TRINITY_DN747_c0_g1_i19.p2	42	47	67	414	312	168	110	151	142
TRINITY_DN4216_c1_g1_i7.p1	61	31	87	2541	4246	11108	308	517	125
TRINITY_DN22808_c0_g1_i5.p1	0	0	0	80	21	5	0	0	0
TRINITY_DN22700_c0_g1_i3.p1	0	0	0	134	30	112	0	0	0
TRINITY_DN188_c0_g2_i3.p1	235	226	324	1079	1120	586	306	625	360
TRINITY_DN5027_c2_g2_i1.p1	0	4	0	200	121	74	0	0	0
TRINITY_DN24939_c0_g1_i3.p2	0	0	0	114	5	8	0	0	0
TRINITY_DN34078_c0_g1_i6.p1	276	207	471	1180	787	1372	26	102	133
TRINITY_DN414_c0_g3_i4.p2	51	48	86	221	361	94	66	95	52
TRINITY_DN414_c0_g3_i8.p2	61	40	61	162	211	128	58	73	63
TRINITY_DN2541_c0_g1_i1.p1	68	86	69	327	354	192	40	78	72
TRINITY_DN615_c0_g1_i2.p1	52	63	78	228	262	170	54	54	90
TRINITY_DN64_c0_g1_i3.p2	0	0	0	586	698	1618	0	0	22
TRINITY_DN5744_c0_g1_i4.p1	6	13	7	633	1322	3429	178	98	31
TRINITY_DN6135_c0_g1_i17.p1	71	105	102	189	206	118	83	72	99
TRINITY_DN5171_c0_g1_i2.p2	139	153	105	875	897	701	404	187	144
TRINITY_DN959_c0_g1_i4.p1	43	458	174	2477	2193	748	265	362	691
TRINITY_DN18563_c0_g1_i2.p1	38	14	24	171	135	70	55	51	53
TRINITY_DN70622_c0_g1_i1.p3	0	0	0	66	15	69	2	6	2
TRINITY_DN791_c0_g1_i8.p1	18	21	42	129	195	120	41	79	51
TRINITY_DN15517_c0_g1_i4.p1	0	0	3	332	260	327	29	24	15
TRINITY_DN60488_c0_g1_i1.p1	0	0	0	78	16	2	0	0	0
TRINITY_DN9353_c0_g1_i3.p1	0	56	1	19927	24437	25013	166	55	92
TRINITY_DN3766_c2_g1_i1.p1	0	3	0	223	657	332	0	0	0
TRINITY_DN6486_c0_g1_i2.p1	10	442	28	45819	24525	17186	118	61	544
TRINITY_DN51299_c1_g1_i1.p1	0	11	0	315	85	165	5	17	12
TRINITY_DN705_c0_g1_i4.p1	34	83	77	263	2053	1601	293	276	88
TRINITY_DN13419_c0_g1_i2.p1	0	0	0	270	537	195	0	0	0
TRINITY_DN1756_c0_g1_i1.p1	1	2	1	50	42	40	4	4	2
TRINITY_DN866_c0_g1_i2.p2	4	9	9	37	408	201	32	43	15
TRINITY_DN866_c0_g1_i2.p1	4	9	9	37	408	201	32	43	15
TRINITY_DN39355_c0_g1_i2.p2	0	0	0	58	22	3	0	0	0
TRINITY_DN24452_c0_g1_i3.p1	1404	1404	1666	3824	3442	3494	1722	2231	1497
TRINITY_DN3177_c0_g1_i11.p2	2	0	2	258	189	145	15	16	8
TRINITY_DN5380_c0_g1_i1.p1	370	364	420	1148	1136	618	415	451	646
TRINITY_DN1025_c2_g1_i4.p1	51	44	138	963	788	891	189	72	253
TRINITY_DN4512_c0_g1_i7.p1	57	132	173	665	643	331	204	238	214
TRINITY_DN319_c0_g1_i10.p1	0	1	2	1759	1361	597	70	80	43
TRINITY_DN3815_c0_g1_i15.p1	171	197	145	547	451	303	182	267	262
TRINITY_DN52563_c0_g1_i1.p1	1	1	3	58	63	17	0	0	0
TRINITY_DN2657_c0_g1_i11.p2	1	2	1	281	444	237	2	2	9
TRINITY_DN2657_c0_g1_i11.p1	0	0	0	257	241	177	2	2	7
TRINITY_DN7349_c0_g2_i2.p1	8	29	19	52	85	65	14	10	13
TRINITY_DN51836_c0_g1_i2.p1	0	0	0	87	20	13	0	0	0
TRINITY_DN6766_c0_g1_i3.p1	159	223	184	307	402	424	25	116	91
TRINITY_DN10565_c0_g2_i3.p1	60	62	90	328	299	166	133	112	69
TRINITY_DN5579_c0_g1_i1.p1	277	319	238	1899	1443	1207	251	390	274
TRINITY_DN1578_c1_g1_i2.p1	1077	1677	1335	4871	5672	7374	2664	2521	2143
TRINITY_DN80661_c0_g1_i5.p1	14	14	47	5017	3611	4126	76	37	81
TRINITY_DN2759_c0_g1_i13.p2	7	19	8	102	254	119	55	24	42
TRINITY_DN2678_c0_g1_i4.p1	120	551	210	1642	1967	2456	490	335	184
TRINITY_DN18928_c0_g1_i9.p1	0	0	4	142	140	210	17	18	19
TRINITY_DN18796_c0_g1_i2.p1	1	3	2	91	43	39	3	0	2
TRINITY_DN1218_c0_g1_i5.p1	339	373	363	1123	1143	921	546	409	196
TRINITY_DN83037_c0_g1_i2.p1	0	2	4	117	45	19	0	0	0
TRINITY_DN1734_c0_g3_i1.p1	275	329	555	1151	1529	1713	614	780	522
TRINITY_DN99051_c0_g2_i1.p1	0	0	0	15	6	24	0	0	0
TRINITY_DN19492_c0_g2_i2.p1	0	0	0	116	59	31	0	0	0
TRINITY_DN7856_c0_g2_i2.p1	738	751	691	19042	17360	17604	8214	6127	6830
TRINITY_DN2571_c0_g2_i1.p1	194	237	176	656	588	297	241	235	285
TRINITY_DN4187_c0_g2_i1.p1	0	0	0	149	254	615	51	22	35
TRINITY_DN1709_c0_g2_i1.p1	21	23	14	279	196	130	12	16	22
TRINITY_DN9788_c1_g1_i2.p1	0	0	0	67	37	40	0	0	0
TRINITY_DN3464_c0_g1_i7.p2	13	29	15	315	503	339	151	64	50
TRINITY_DN15523_c2_g2_i1.p1	0	0	0	175	72	61	3	4	5
TRINITY_DN54584_c0_g1_i2.p1	1	5	4	168	164	106	32	29	13
TRINITY_DN6815_c0_g1_i4.p1	0	0	0	129	76	98	11	2	0
TRINITY_DN28374_c0_g1_i2.p4	21	17	26	107	329	183	18	18	24
TRINITY_DN28374_c0_g1_i2.p3	18	14	21	98	116	93	15	15	20
TRINITY_DN8794_c0_g1_i11.p2	126	123	174	244	408	242	108	145	111
TRINITY_DN8794_c0_g1_i11.p1	97	84	123	193	272	240	55	103	93
TRINITY_DN4909_c0_g1_i2.p2	1447	810	476	3698	6444	3696	2038	2095	1345
TRINITY_DN60160_c0_g1_i1.p1	0	0	0	43	11	6	0	0	0
TRINITY_DN28591_c0_g1_i7.p2	6	4	10	107	125	89	43	26	30
TRINITY_DN4909_c0_g1_i6.p1	944	666	420	2798	3310	2537	1834	1459	1038
TRINITY_DN21011_c0_g1_i1.p1	4181	5978	11824	86749	164314	114946	6694	6709	10350
TRINITY_DN29534_c0_g2_i4.p1	123	81	113	276	1187	431	106	135	230
TRINITY_DN9936_c0_g1_i10.p1	0	1	1	37	95	95	21	18	10
TRINITY_DN8475_c0_g1_i1.p2	152	105	168	287	468	255	104	83	164
TRINITY_DN9788_c1_g1_i4.p1	0	0	0	20	17	11	0	0	0
TRINITY_DN2116_c0_g3_i1.p1	37	81	47	215	681	1062	181	55	64
TRINITY_DN11207_c0_g1_i1.p1	2760	2389	3907	18013	16229	20416	6422	4531	4955
TRINITY_DN10050_c0_g1_i1.p1	5501	5729	6255	37594	29525	21435	9683	11285	7872
TRINITY_DN1139_c3_g1_i1.p1	11	4	3	260	211	86	61	39	29
TRINITY_DN3907_c0_g1_i2.p1	3	15	13	8726	3860	8681	1449	623	63
TRINITY_DN4371_c1_g1_i5.p1	473	480	478	1699	1795	2078	977	804	768
TRINITY_DN4371_c1_g1_i5.p2	523	743	497	1852	1930	2677	1063	921	868
TRINITY_DN55636_c0_g1_i6.p2	0	8	22	1537	880	1226	146	184	83
TRINITY_DN55636_c0_g1_i6.p1	0	5	0	1372	752	1032	0	0	0
TRINITY_DN464_c1_g1_i1.p2	98	115	129	529	659	250	119	220	104
TRINITY_DN464_c1_g1_i1.p1	89	60	78	318	503	189	70	110	69
TRINITY_DN17442_c0_g1_i2.p1	0	3	3	134	150	74	32	31	20
TRINITY_DN13011_c0_g1_i5.p1	0	0	1	34	30	15	0	2	3
TRINITY_DN10485_c0_g1_i2.p2	0	1	0	102	16	45	0	0	1
TRINITY_DN1289_c0_g2_i7.p1	76	99	124	186	290	145	84	69	82
TRINITY_DN18796_c0_g1_i1.p1	1	3	3	181	74	82	12	6	6
TRINITY_DN16384_c0_g1_i1.p1	37	43	59	192	248	303	79	86	71
TRINITY_DN90_c0_g4_i7.p1	269	700	312	4862	3356	2993	2343	1843	1562
TRINITY_DN820_c0_g1_i24.p1	46	45	41	314	325	272	131	132	119
TRINITY_DN364_c4_g1_i1.p1	5	11	0	68	39	65	9	4	6
TRINITY_DN16384_c0_g1_i5.p1	36	47	52	145	160	191	72	60	39
TRINITY_DN8261_c0_g1_i2.p1	105	138	157	581	580	118	102	128	93
TRINITY_DN12720_c1_g1_i2.p1	601	441	558	1551	1760	792	604	533	477
TRINITY_DN4566_c0_g1_i1.p2	216	161	370	855	1045	821	516	429	501
TRINITY_DN4990_c0_g2_i4.p1	1389	1507	2062	5475	5100	5590	3156	3084	2869
TRINITY_DN4448_c0_g1_i1.p1	226	228	300	1273	1111	996	393	470	300
TRINITY_DN10816_c0_g1_i3.p1	194	107	182	403	1666	674	221	327	257
TRINITY_DN14290_c0_g2_i2.p1	66	84	127	295	294	215	97	159	132
TRINITY_DN19412_c0_g2_i9.p1	0	0	3	100	60	35	0	0	6
TRINITY_DN3651_c0_g1_i2.p1	438	851	633	2118	1822	2022	759	796	1133
TRINITY_DN9001_c0_g1_i4.p1	1057	1299	1762	5245	4439	4787	2045	3267	2606
TRINITY_DN9497_c0_g1_i3.p1	12	21	47	1334	1004	1688	609	269	284
TRINITY_DN7824_c1_g1_i6.p1	68	70	186	876	724	787	125	152	425
TRINITY_DN626_c0_g2_i5.p1	208	202	286	912	895	715	287	406	501
TRINITY_DN7627_c0_g2_i1.p1	212	181	158	1882	1615	1367	790	368	258
TRINITY_DN1025_c1_g2_i1.p1	5	59	20	812	541	2218	363	70	111
TRINITY_DN4794_c1_g1_i6.p1	66	90	97	2110	2047	1778	835	558	311
TRINITY_DN7824_c1_g1_i2.p1	18	24	55	289	194	166	34	48	93
TRINITY_DN34078_c0_g1_i4.p3	7	3	5	92	71	27	0	7	3
TRINITY_DN2663_c1_g1_i1.p2	12	22	20	734	625	317	122	82	150
TRINITY_DN2663_c1_g1_i1.p1	9	16	14	337	371	231	97	63	120
TRINITY_DN7401_c1_g1_i2.p1	1755	1959	2348	4404	5378	5583	2878	2982	2963
TRINITY_DN6910_c0_g2_i8.p1	2	1	0	415	278	114	8	1	0
TRINITY_DN6910_c0_g2_i8.p2	2	1	1	459	299	135	12	2	51
TRINITY_DN1647_c0_g1_i6.p2	365	226	277	871	616	814	373	416	311
TRINITY_DN26894_c0_g2_i2.p3	18	10	28	136	145	62	43	37	50
TRINITY_DN1888_c0_g3_i2.p1	16	82	88	389	552	477	104	87	100
TRINITY_DN24761_c0_g1_i7.p1	56	16	60	1641	1457	2078	586	324	155
TRINITY_DN2657_c0_g1_i2.p1	1	2	2	562	608	367	10	4	9
TRINITY_DN1370_c0_g1_i4.p2	2	46	10	340	595	531	139	21	13
TRINITY_DN9114_c2_g1_i2.p4	0	3	3	606	759	204	57	13	9
TRINITY_DN5744_c0_g1_i8.p1	4	6	5	571	1307	3278	172	108	28
TRINITY_DN18678_c0_g1_i6.p1	2	4	9	54	58	36	11	3	10
TRINITY_DN23074_c0_g1_i1.p1	0	0	8	695	533	501	102	165	116
TRINITY_DN6485_c0_g1_i2.p1	688	933	1082	5318	4516	2934	1546	1598	898
TRINITY_DN325_c0_g5_i1.p2	103	139	98	335	482	359	193	252	196
TRINITY_DN2657_c0_g1_i8.p1	1	3	5	623	724	534	5	2	17
TRINITY_DN56145_c0_g1_i1.p2	0	0	0	68	10	59	0	0	0
TRINITY_DN23040_c1_g1_i1.p1	0	0	0	19	36	22	0	0	0
TRINITY_DN4130_c0_g1_i4.p1	121	122	151	280	189	255	55	74	74
TRINITY_DN4453_c0_g1_i5.p1	1005	1000	925	2832	4067	1899	875	950	1043
TRINITY_DN4566_c0_g1_i2.p1	305	421	388	2257	2438	1992	927	873	1021
TRINITY_DN966_c0_g2_i1.p1	22	83	58	986	1137	1346	222	222	268
TRINITY_DN754_c0_g1_i1.p2	57	69	55	202	134	140	62	46	47
TRINITY_DN357_c0_g1_i9.p1	740	844	674	2975	2651	1140	998	1216	1072
TRINITY_DN2717_c1_g2_i2.p1	1039	1395	1627	2780	2368	2061	944	1719	1379
TRINITY_DN14659_c0_g1_i1.p1	875	643	831	1479	2378	2023	555	912	587
TRINITY_DN12249_c0_g1_i1.p1	33	45	51	291	156	157	20	46	8
TRINITY_DN33781_c0_g1_i6.p2	0	0	0	119	15	63	0	0	0
TRINITY_DN21103_c0_g1_i2.p1	0	0	0	104	28	8	0	0	0
TRINITY_DN28228_c0_g1_i2.p1	0	0	6	14	33	298	7	6	0
TRINITY_DN4638_c0_g1_i3.p1	131	124	138	849	962	439	419	322	281
TRINITY_DN1972_c0_g1_i2.p1	0	14	12	332	394	363	38	7	4
TRINITY_DN4638_c0_g1_i3.p3	131	124	138	849	962	439	419	322	281
TRINITY_DN4638_c0_g1_i3.p2	131	124	138	849	962	439	419	322	281
TRINITY_DN4638_c0_g1_i7.p5	132	107	135	848	866	366	296	276	262
TRINITY_DN4638_c0_g1_i7.p1	132	107	135	848	866	366	296	276	262
TRINITY_DN4638_c0_g1_i7.p3	132	107	135	848	866	366	296	276	262
TRINITY_DN4638_c0_g1_i7.p2	132	107	135	848	866	366	296	276	262
TRINITY_DN6566_c0_g1_i4.p1	58	131	136	2679	2351	2060	1200	1152	1228
TRINITY_DN396_c0_g1_i12.p1	62	97	98	499	387	524	162	157	93
TRINITY_DN8216_c0_g1_i11.p1	0	3	4	132	51	22	5	2	6
TRINITY_DN1949_c1_g2_i2.p1	162	176	249	564	461	440	164	151	304
TRINITY_DN5797_c0_g1_i7.p1	10	2	0	209	196	102	8	7	4
TRINITY_DN8536_c0_g1_i2.p1	169	212	274	3191	3602	7882	1020	1132	625
TRINITY_DN319_c0_g1_i1.p2	0	1	2	1011	734	337	47	39	22
TRINITY_DN2250_c0_g2_i7.p1	6	4	6	256	232	331	118	77	55
TRINITY_DN14037_c0_g1_i1.p1	8	55	36	2603	2681	2383	227	100	134
TRINITY_DN3435_c0_g1_i9.p1	94	132	135	480	494	369	278	267	179
TRINITY_DN2109_c0_g2_i1.p1	5	5	16	122	383	502	46	33	40
TRINITY_DN3772_c0_g1_i5.p1	0	2	0	524	696	180	1	2	0
TRINITY_DN27983_c0_g1_i1.p2	0	6	15	676	874	353	34	67	25
TRINITY_DN9177_c0_g1_i5.p3	0	3	7	411	252	17	23	13	17
TRINITY_DN8602_c0_g1_i8.p1	12	29	40	123	108	191	20	12	10
TRINITY_DN1074_c1_g3_i3.p1	261	305	273	1353	818	402	265	339	265
TRINITY_DN464_c1_g2_i1.p1	1125	739	1109	5253	6916	3069	1418	2530	996
TRINITY_DN36_c0_g1_i10.p1	221	272	239	601	595	679	111	182	188
TRINITY_DN28655_c0_g2_i1.p1	0	0	0	49	14	6	0	0	0
TRINITY_DN13647_c0_g2_i1.p1	0	32	2	3240	6691	6438	504	122	82
TRINITY_DN8462_c0_g1_i1.p1	135	131	155	774	781	376	226	219	250
TRINITY_DN194_c1_g1_i3.p1	522	641	764	5180	3541	2767	1100	1671	1238
TRINITY_DN10227_c0_g1_i16.p1	6	7	9	279	167	43	5	10	10
TRINITY_DN3058_c0_g1_i1.p1	8	0	4	770	300	309	20	6	52
TRINITY_DN10227_c0_g1_i12.p2	2	1	7	402	201	51	3	6	8
TRINITY_DN1370_c0_g1_i7.p2	6	26	12	571	1056	425	190	45	17
TRINITY_DN8559_c0_g1_i2.p1	69	72	105	306	225	208	39	44	81
TRINITY_DN26593_c0_g1_i9.p1	152	197	200	483	472	383	245	205	232
TRINITY_DN15215_c0_g1_i4.p1	0	1	0	27	11	27	2	1	0
TRINITY_DN10911_c0_g1_i6.p1	32	39	42	163	144	155	23	40	40
TRINITY_DN2516_c0_g1_i2.p1	537	730	688	2017	2529	1710	1179	639	502
TRINITY_DN18235_c1_g2_i1.p1	0	0	0	329	130	193	0	0	0
TRINITY_DN6678_c0_g2_i4.p1	253	123	73	2032	2158	1139	1130	900	781
TRINITY_DN8063_c0_g1_i2.p1	0	0	0	229	184	116	0	0	0
TRINITY_DN38739_c0_g1_i2.p2	0	0	0	54	15	16	0	0	0
TRINITY_DN3702_c0_g1_i12.p1	70	78	40	358	649	735	91	142	149
TRINITY_DN1403_c0_g1_i3.p2	79	44	37	304	334	182	110	135	60
TRINITY_DN1403_c0_g1_i3.p1	65	36	30	260	295	151	92	130	53
TRINITY_DN1289_c0_g2_i10.p4	51	64	72	133	204	87	61	51	57
TRINITY_DN1289_c0_g2_i10.p1	51	64	72	133	204	87	61	51	57
TRINITY_DN1289_c0_g2_i10.p2	51	64	72	133	204	87	61	51	57
TRINITY_DN1289_c0_g2_i10.p3	51	64	72	133	204	87	61	51	57
TRINITY_DN641_c0_g1_i2.p1	179	168	277	374	475	292	56	51	79
TRINITY_DN6341_c1_g2_i4.p3	0	9	18	521	445	118	36	58	38
TRINITY_DN33775_c0_g2_i1.p1	0	0	0	39	37	6	2	2	0
TRINITY_DN20002_c0_g1_i2.p1	0	0	0	491	83	63	0	0	2
TRINITY_DN28608_c0_g1_i1.p2	0	0	0	77	8	6	0	0	0
TRINITY_DN6088_c0_g1_i5.p1	24	18	61	146	131	216	58	70	45
TRINITY_DN94306_c0_g1_i1.p1	0	0	0	29	15	18	0	0	0
TRINITY_DN2759_c0_g1_i15.p1	12	16	15	114	198	90	57	29	44
TRINITY_DN754_c0_g1_i8.p1	68	87	102	297	262	189	97	90	91
TRINITY_DN35037_c0_g2_i2.p1	0	0	0	11	31	40	0	0	0
TRINITY_DN4560_c1_g1_i1.p1	633	274	448	4730	7260	3036	2107	975	966
TRINITY_DN1068_c0_g1_i8.p1	9	20	49	375	361	168	103	116	73
TRINITY_DN11240_c0_g1_i3.p1	68	100	111	370	360	360	179	210	229
TRINITY_DN20429_c0_g1_i1.p1	107	157	148	852	702	416	191	276	224
TRINITY_DN1165_c0_g1_i1.p1	208	293	253	1679	2844	1700	485	447	357
TRINITY_DN10359_c0_g1_i3.p1	7	7	11	529	409	809	46	85	11
TRINITY_DN14514_c0_g1_i9.p1	51	50	65	245	167	103	61	70	53
TRINITY_DN15493_c0_g4_i1.p1	0	5	4	767	903	1167	246	66	55
TRINITY_DN1197_c0_g1_i2.p1	4742	10426	7944	29257	20602	24608	10090	14731	15369
TRINITY_DN26858_c0_g2_i1.p1	0	0	0	20	27	10	0	0	0
TRINITY_DN6815_c0_g1_i1.p1	0	0	0	135	87	74	5	1	0
TRINITY_DN12921_c0_g1_i2.p2	6	4	16	77	88	28	3	6	0
TRINITY_DN11674_c0_g1_i3.p1	839	978	931	2684	3432	1608	433	737	711
TRINITY_DN4638_c0_g1_i9.p1	150	122	136	883	959	428	358	301	277
TRINITY_DN8466_c1_g1_i7.p1	242	218	220	2152	8491	5969	1939	969	1432
TRINITY_DN820_c0_g1_i8.p1	37	55	46	302	300	307	129	121	113
TRINITY_DN1441_c0_g1_i26.p1	0	0	0	577	466	174	1	1	2
TRINITY_DN3472_c0_g2_i3.p2	108	65	116	246	200	158	80	78	95
TRINITY_DN3472_c0_g2_i3.p1	66	47	92	228	147	127	60	62	79
TRINITY_DN8507_c0_g1_i2.p1	9	3	24	365	478	620	165	46	77
TRINITY_DN1668_c0_g1_i9.p2	214	208	128	478	394	257	144	170	198
TRINITY_DN6567_c0_g1_i3.p1	212	250	302	646	513	299	239	224	293
TRINITY_DN9961_c0_g1_i2.p1	77	168	181	2067	899	1050	191	338	259
TRINITY_DN1659_c0_g1_i3.p1	177	207	163	1290	1100	817	565	548	580
TRINITY_DN14558_c0_g2_i1.p1	160	138	213	423	1722	568	217	344	263
TRINITY_DN35735_c0_g1_i1.p1	0	0	0	15	46	11	0	0	0
TRINITY_DN15694_c0_g1_i1.p1	1	2	0	53	99	31	4	0	6
TRINITY_DN12535_c0_g1_i2.p2	91	116	128	1011	984	770	437	511	412
TRINITY_DN7627_c0_g2_i3.p2	28	27	12	614	554	191	110	61	65
TRINITY_DN78943_c0_g1_i1.p1	0	0	0	10	17	16	0	0	0
TRINITY_DN7627_c0_g2_i7.p2	111	80	27	666	617	394	136	75	110
TRINITY_DN3256_c0_g1_i9.p2	271	276	350	693	598	429	291	346	307
TRINITY_DN38292_c0_g1_i4.p1	0	0	0	118	37	9	0	0	0
TRINITY_DN4638_c0_g2_i3.p1	49	69	48	579	551	333	219	259	269
TRINITY_DN31927_c0_g2_i1.p1	54	46	78	231	204	124	54	36	60
TRINITY_DN4043_c0_g1_i3.p2	3758	3234	2685	6491	6680	6408	3695	3637	3323
TRINITY_DN3898_c0_g2_i2.p2	7	37	20	2313	2284	657	164	185	302
TRINITY_DN19168_c0_g1_i5.p1	8	20	106	394	532	312	176	237	192
TRINITY_DN29113_c0_g1_i1.p2	0	0	0	53	33	17	0	0	0
TRINITY_DN4317_c0_g1_i3.p3	31	41	39	612	812	438	168	229	61
TRINITY_DN820_c0_g1_i17.p1	13	8	4	77	82	84	30	31	21
TRINITY_DN2016_c0_g1_i4.p1	517	655	835	4681	3644	3291	1953	2025	1727
TRINITY_DN6192_c0_g1_i8.p1	8	22	18	235	90	80	26	14	23
TRINITY_DN6142_c0_g4_i1.p1	117	121	167	769	694	1082	70	76	76
TRINITY_DN13980_c0_g1_i10.p4	0	3	3	242	196	9	10	10	11
TRINITY_DN8409_c0_g4_i1.p1	4	0	3	53	37	13	0	0	0
TRINITY_DN7348_c0_g1_i2.p1	374	348	503	878	1269	1064	496	683	377
TRINITY_DN4376_c0_g1_i2.p1	692	1013	856	1716	1418	1492	647	967	959
TRINITY_DN4376_c0_g1_i6.p1	377	570	508	937	826	883	324	482	573
TRINITY_DN8848_c0_g1_i4.p1	21	22	22	154	224	272	26	43	82
TRINITY_DN16086_c0_g1_i16.p1	221	242	261	1128	858	838	394	440	375
TRINITY_DN10195_c0_g1_i1.p2	11	46	42	258	643	101	44	22	24
TRINITY_DN10195_c0_g1_i1.p1	11	39	34	220	603	94	44	22	22
TRINITY_DN21019_c0_g1_i4.p2	0	0	0	205	60	14	0	0	0
TRINITY_DN975_c0_g1_i5.p1	279	191	299	1705	1383	1866	417	808	537
TRINITY_DN27668_c0_g1_i1.p1	0	0	0	8	95	7	0	0	0
TRINITY_DN10359_c0_g1_i2.p1	36	19	33	700	439	702	115	220	24
TRINITY_DN1485_c0_g2_i4.p1	2	0	2	82	233	255	0	10	2
TRINITY_DN30743_c0_g2_i2.p2	0	0	0	184	78	49	0	0	0
TRINITY_DN5226_c0_g1_i10.p1	94	69	109	224	238	104	58	104	74
TRINITY_DN21732_c0_g1_i10.p1	5	5	14	61	61	59	9	18	11
TRINITY_DN21732_c0_g1_i7.p2	4	3	12	63	56	29	5	7	5
TRINITY_DN27547_c0_g1_i1.p1	0	2	4	186	106	151	40	32	22
TRINITY_DN38556_c0_g2_i1.p1	489	524	664	2088	2152	2354	814	1086	900
TRINITY_DN7285_c0_g1_i13.p1	108	164	197	753	1038	1285	279	232	172
TRINITY_DN1893_c0_g1_i1.p1	53	77	139	1029	1454	6355	540	537	158
TRINITY_DN1579_c5_g1_i2.p1	11	13	8	78	64	57	21	29	14
TRINITY_DN9782_c0_g1_i4.p1	15	31	12	1416	1923	3471	360	243	163
TRINITY_DN47542_c0_g2_i1.p1	0	0	0	11	125	67	0	0	0
TRINITY_DN1441_c0_g1_i6.p2	1	0	3	311	196	73	0	2	3
TRINITY_DN1441_c0_g1_i6.p1	0	0	0	279	185	60	0	0	2
TRINITY_DN54406_c0_g1_i1.p1	4	15	9	1773	2192	4862	74	119	670
TRINITY_DN24761_c0_g1_i3.p1	100	19	32	455	368	426	183	96	60
TRINITY_DN1939_c0_g1_i6.p1	640	641	840	1866	1375	980	564	828	776
TRINITY_DN23186_c0_g1_i3.p2	2	2	2	199	86	13	4	1	2
TRINITY_DN26823_c0_g1_i4.p1	0	6	0	385	160	117	0	2	10
TRINITY_DN72413_c0_g1_i3.p1	0	6	15	189	311	143	29	52	75
TRINITY_DN4571_c0_g3_i1.p3	122	139	174	898	301	868	152	183	168
TRINITY_DN12116_c0_g1_i2.p1	373	471	566	2458	3375	3566	1624	718	569
TRINITY_DN25191_c0_g1_i1.p1	0	0	0	65	8	12	0	0	0
TRINITY_DN1816_c2_g1_i6.p2	47	56	206	943	2440	3453	447	426	650
TRINITY_DN9391_c0_g1_i2.p2	0	0	0	241	58	27	0	0	0
TRINITY_DN9704_c0_g1_i1.p1	117	78	139	949	780	553	98	163	108
TRINITY_DN2966_c0_g1_i3.p1	340	355	228	1076	1220	1134	677	552	437
TRINITY_DN19412_c0_g2_i3.p1	0	0	4	152	86	42	1	0	6
TRINITY_DN18928_c0_g1_i5.p1	0	0	5	141	129	219	27	26	14
TRINITY_DN4853_c2_g1_i2.p1	15	2	0	2697	2788	5127	1007	114	48
TRINITY_DN13980_c0_g1_i1.p3	0	3	5	297	191	7	9	11	16
TRINITY_DN9234_c0_g1_i1.p1	0	1	0	76	140	115	0	0	13
TRINITY_DN14810_c0_g1_i3.p1	0	0	0	34	43	2	0	0	0
TRINITY_DN10944_c0_g2_i1.p1	0	0	0	544	462	205	0	8	0
TRINITY_DN10249_c0_g1_i5.p1	16	69	52	336	309	136	30	28	31
TRINITY_DN20566_c0_g2_i4.p1	4	3	10	60	68	28	5	7	9
TRINITY_DN2874_c0_g1_i14.p1	65	93	49	721	613	471	306	195	152
TRINITY_DN2874_c0_g1_i10.p1	94	120	46	735	628	532	327	238	162
TRINITY_DN17749_c0_g1_i1.p1	13	46	51	194	356	80	60	26	55
TRINITY_DN884_c0_g1_i7.p1	74	91	145	328	240	259	49	47	95
TRINITY_DN5207_c0_g1_i2.p1	78	86	116	408	312	364	69	131	101
TRINITY_DN8409_c0_g3_i15.p2	35	24	45	83	161	83	26	33	22
TRINITY_DN16397_c0_g1_i8.p1	0	1	0	66	31	37	6	5	5
TRINITY_DN437_c0_g1_i5.p1	32	83	43	16719	14328	13924	1531	2562	349
TRINITY_DN4638_c0_g1_i13.p2	139	113	132	802	862	360	298	265	265
TRINITY_DN1165_c0_g1_i7.p1	214	276	283	1755	3131	1839	526	591	460
TRINITY_DN12304_c0_g1_i1.p1	118	40	99	338	532	117	49	35	49
TRINITY_DN2880_c0_g2_i3.p1	52	75	51	824	884	896	421	365	250
TRINITY_DN48252_c0_g1_i1.p1	10	6	32	418	585	113	48	32	137
TRINITY_DN734_c0_g2_i1.p1	2725	3874	3898	6951	6840	4902	2582	3298	2559
TRINITY_DN28838_c0_g1_i1.p1	0	0	0	5	401	171	0	0	0
TRINITY_DN18115_c0_g1_i13.p1	34	19	32	205	112	86	29	34	45
TRINITY_DN28199_c0_g1_i2.p1	0	0	0	35	15	12	0	0	0
TRINITY_DN4959_c0_g1_i1.p1	0	0	5	105	162	273	24	28	37
TRINITY_DN6548_c0_g1_i5.p1	468	578	767	3640	3446	3827	1282	1284	1016
TRINITY_DN6399_c0_g2_i5.p1	44	26	98	206	178	154	90	35	51
TRINITY_DN8466_c1_g1_i5.p1	305	312	277	2870	10889	10009	2196	1344	1790
TRINITY_DN8885_c0_g1_i14.p1	8	9	15	102	90	49	32	15	21
TRINITY_DN1620_c0_g1_i8.p1	15	21	35	241	307	231	38	81	41
TRINITY_DN1620_c0_g1_i8.p2	23	32	48	358	411	357	59	125	63
TRINITY_DN11986_c1_g3_i3.p2	19	25	61	456	921	138	135	143	101
TRINITY_DN33101_c0_g1_i6.p2	1	0	1	52	52	28	1	2	1
TRINITY_DN18737_c1_g1_i1.p1	3	0	11	2934	2578	1578	41	115	95
TRINITY_DN5320_c0_g1_i7.p1	12	91	299	4731	2406	276	165	10	148
TRINITY_DN25954_c0_g1_i2.p1	14	31	12	547	574	472	171	169	81
TRINITY_DN59571_c0_g1_i1.p1	0	0	0	11	22	9	0	0	0
TRINITY_DN5207_c0_g1_i3.p1	75	87	109	399	309	363	76	142	101
TRINITY_DN2321_c0_g1_i2.p1	180	228	209	552	622	611	200	349	316
TRINITY_DN1270_c0_g2_i2.p1	174	238	270	1926	1648	778	559	685	492
TRINITY_DN13904_c1_g1_i1.p1	471	407	433	2471	1411	875	429	710	685
TRINITY_DN1638_c0_g1_i4.p1	0	0	5	572	655	549	80	71	65
TRINITY_DN1679_c1_g1_i2.p2	86	85	78	453	467	256	254	173	184
TRINITY_DN14015_c0_g1_i5.p1	3	0	6	88	22	29	2	1	2
TRINITY_DN3240_c0_g1_i2.p2	23	28	42	194	149	113	76	88	78
TRINITY_DN3240_c0_g1_i2.p3	23	28	42	194	149	113	76	88	78
TRINITY_DN3240_c0_g1_i2.p1	23	28	42	194	149	113	76	88	78
TRINITY_DN1370_c0_g1_i2.p3	4	20	10	542	906	386	165	39	25
TRINITY_DN9217_c0_g2_i1.p1	6	8	4	100	101	84	14	24	13
TRINITY_DN3592_c0_g1_i3.p1	1728	2177	2497	5468	4570	3340	2423	2582	1981
TRINITY_DN63657_c0_g1_i1.p1	0	0	0	4	99	8	0	0	0
TRINITY_DN7910_c0_g2_i3.p1	0	0	0	116	61	211	0	0	0
TRINITY_DN6921_c0_g2_i1.p1	27	40	121	450	453	899	163	185	151
TRINITY_DN62200_c0_g1_i1.p1	0	0	0	70	8	12	0	0	0
TRINITY_DN3760_c0_g3_i1.p1	5961	5360	5557	33122	31171	21083	19422	14405	10676
TRINITY_DN3472_c0_g2_i13.p2	106	52	95	215	171	225	81	49	64
TRINITY_DN21011_c0_g1_i2.p1	3799	4932	10480	73790	135057	106803	11646	10228	12538
TRINITY_DN16749_c0_g4_i3.p1	0	3	0	23	13	35	0	0	0
TRINITY_DN57305_c0_g1_i4.p1	3	1	0	33	29	13	0	0	0
TRINITY_DN1982_c0_g1_i6.p1	8	8	13	271	270	158	90	34	38
TRINITY_DN24761_c0_g1_i3.p2	100	19	32	455	368	426	183	96	60
TRINITY_DN1441_c0_g1_i19.p1	0	0	2	397	298	170	0	2	0
TRINITY_DN7502_c1_g1_i4.p1	0	4	4	182	174	69	40	48	12
TRINITY_DN26710_c0_g2_i1.p1	0	18	4	67	124	101	33	37	18
TRINITY_DN2949_c0_g1_i9.p1	186	74	210	870	963	334	212	252	192
TRINITY_DN23670_c0_g1_i2.p1	0	0	0	77	14	3	0	0	0
TRINITY_DN10227_c0_g1_i1.p2	2	1	4	210	102	45	3	6	6
TRINITY_DN316_c0_g1_i5.p1	0	0	0	2161	2795	2643	0	0	0
TRINITY_DN17442_c0_g1_i1.p1	0	3	3	126	139	87	17	19	20
TRINITY_DN54406_c0_g1_i4.p1	0	0	1	393	587	711	2	8	35
TRINITY_DN8641_c0_g1_i1.p1	46	14	52	502	576	342	233	232	195
TRINITY_DN4051_c0_g2_i7.p1	74	55	74	162	188	140	49	87	76
TRINITY_DN6192_c0_g1_i4.p2	4	9	9	114	83	68	12	5	7
TRINITY_DN70130_c0_g1_i1.p1	0	0	2	42	33	20	0	0	0
TRINITY_DN1952_c0_g1_i11.p1	69	99	173	1045	937	426	355	446	383
TRINITY_DN1888_c0_g3_i4.p1	15	0	69	468	554	388	67	79	96
TRINITY_DN7963_c0_g1_i2.p1	605	1380	1987	14972	17958	25623	1316	1919	4290
TRINITY_DN4581_c0_g1_i5.p1	118	108	173	528	595	375	157	170	140
TRINITY_DN2657_c0_g1_i7.p1	1	2	3	717	813	606	6	9	27
TRINITY_DN4581_c0_g1_i1.p1	15	15	22	80	80	42	24	14	14
TRINITY_DN6384_c0_g2_i2.p1	1716	2091	2808	9141	7266	5854	3249	3952	4798
TRINITY_DN136_c0_g2_i2.p1	21	17	37	142	131	68	28	16	11
TRINITY_DN33101_c0_g1_i3.p3	0	0	0	87	49	19	1	1	1
TRINITY_DN401_c0_g1_i4.p1	644	2321	1428	5821	9089	2838	1892	1955	3110
TRINITY_DN6449_c0_g1_i2.p4	85	61	84	243	497	217	161	107	117
TRINITY_DN6449_c0_g1_i2.p2	85	61	84	243	466	217	161	107	117
TRINITY_DN6449_c0_g1_i2.p1	85	61	84	243	453	217	161	107	117
TRINITY_DN16677_c0_g1_i2.p1	29	24	64	354	519	565	66	107	190
TRINITY_DN4445_c0_g3_i1.p1	0	0	0	598	381	300	10	18	4
TRINITY_DN1370_c0_g1_i7.p1	4	19	8	451	893	404	152	38	13
TRINITY_DN30501_c0_g1_i1.p1	0	0	0	59	10	38	0	0	0
TRINITY_DN9504_c1_g2_i2.p1	818	803	984	3096	6050	6751	1242	1530	799
TRINITY_DN5682_c0_g2_i2.p1	61	52	47	280	236	266	113	96	86
TRINITY_DN4495_c0_g2_i1.p1	26	30	23	150	296	112	8	15	53
TRINITY_DN8409_c0_g3_i1.p2	19	26	22	57	70	49	21	13	14
TRINITY_DN1952_c0_g1_i5.p1	51	79	114	597	615	280	249	283	217
TRINITY_DN7285_c0_g1_i6.p1	113	119	160	951	1348	2023	669	361	244
TRINITY_DN9936_c0_g1_i8.p1	0	3	2	34	92	83	11	19	5
TRINITY_DN54406_c0_g1_i3.p1	0	0	2	529	740	1114	2	8	31
TRINITY_DN5849_c0_g1_i3.p1	26	38	40	101	121	105	37	53	21
TRINITY_DN5849_c0_g1_i3.p2	26	38	40	101	121	105	37	53	21
TRINITY_DN7988_c0_g2_i1.p1	2	4	0	30	21	98	4	0	0
TRINITY_DN1592_c0_g1_i3.p1	23	28	42	130	138	60	32	36	31
TRINITY_DN7749_c0_g2_i1.p1	12	11	0	239	747	6	4	0	2
TRINITY_DN2874_c0_g1_i6.p1	94	110	57	828	700	581	343	231	183
TRINITY_DN3702_c0_g1_i7.p1	41	57	85	279	473	582	97	105	143
TRINITY_DN16078_c0_g1_i7.p1	0	0	0	55	39	42	0	0	5
TRINITY_DN739_c0_g1_i3.p1	1315	1486	1446	3651	3451	3517	2228	1664	1461
TRINITY_DN2513_c0_g2_i2.p1	345	671	602	1970	2161	1723	586	917	1023
TRINITY_DN4445_c2_g1_i1.p1	0	2	0	422	225	216	5	6	4
TRINITY_DN153_c0_g1_i4.p1	448	407	407	3306	2085	2143	1332	1042	744
TRINITY_DN1563_c0_g4_i1.p1	0	0	0	22	40	28	0	0	0
TRINITY_DN153_c0_g1_i8.p1	71	54	47	307	301	283	85	155	84
TRINITY_DN5307_c0_g1_i1.p2	7	9	2	861	479	393	17	6	12
TRINITY_DN12885_c0_g1_i1.p1	0	0	0	107	103	101	22	1	5
TRINITY_DN396_c0_g1_i17.p2	53	117	109	270	316	283	116	75	54
TRINITY_DN3002_c6_g2_i2.p1	178	155	155	284	400	200	122	114	181
TRINITY_DN34078_c0_g1_i1.p1	442	373	735	1588	1174	2047	53	143	187
TRINITY_DN3576_c0_g1_i4.p1	0	0	0	23	28	14	0	0	0
TRINITY_DN5744_c0_g1_i7.p1	2	2	4	466	1041	2491	198	107	31
TRINITY_DN15083_c0_g1_i8.p1	1	2	0	51	42	10	0	0	1
TRINITY_DN5663_c0_g1_i7.p1	0	67	153	1097	1128	953	538	511	369
TRINITY_DN1394_c0_g1_i1.p1	31	30	53	983	711	1048	262	374	101
TRINITY_DN7057_c0_g1_i3.p1	1880	2255	2305	13931	10553	10011	2243	2875	3126
TRINITY_DN45066_c0_g1_i1.p1	0	0	0	5	26	17	0	0	0
TRINITY_DN34158_c0_g1_i1.p1	0	0	0	9	11	23	0	0	0
TRINITY_DN26593_c0_g1_i3.p1	55	73	65	203	202	123	93	90	89
TRINITY_DN7278_c0_g1_i6.p1	85	152	95	310	339	267	63	103	118
TRINITY_DN27278_c0_g1_i2.p1	10	26	23	189	91	59	38	28	36
TRINITY_DN6548_c0_g1_i13.p1	318	344	416	1546	1571	1504	529	624	395
TRINITY_DN3372_c2_g1_i5.p1	61	98	144	542	685	306	213	256	253
TRINITY_DN3372_c2_g1_i1.p1	88	115	178	571	699	297	212	254	259
TRINITY_DN27066_c0_g1_i1.p1	0	9	0	217	175	493	25	23	4
TRINITY_DN1289_c0_g2_i7.p3	76	99	124	186	290	145	84	69	82
TRINITY_DN1289_c0_g2_i7.p2	76	99	124	186	290	145	84	69	82
TRINITY_DN6486_c0_g1_i1.p2	9	495	22	16141	9315	5658	101	71	439
TRINITY_DN3642_c0_g1_i1.p1	132	143	179	812	1266	602	210	463	441
TRINITY_DN2441_c0_g1_i4.p1	460	645	883	3665	4517	8699	1516	1509	1094
TRINITY_DN8462_c0_g1_i4.p1	146	142	196	963	971	448	242	245	288
TRINITY_DN7243_c0_g1_i13.p1	513	687	715	1359	1261	1382	290	495	567
TRINITY_DN61975_c0_g1_i1.p2	0	0	0	16	9	13	0	0	0
TRINITY_DN1296_c0_g1_i14.p2	313	127	110	1006	899	779	521	377	310
TRINITY_DN357_c1_g2_i1.p1	179	174	338	2157	1879	2748	324	514	497
TRINITY_DN37378_c0_g1_i2.p2	0	0	0	23	23	8	0	0	0
TRINITY_DN16965_c1_g1_i1.p1	0	0	0	35	30	25	0	2	0
TRINITY_DN6144_c0_g1_i1.p1	0	3	9	177	190	382	22	10	38
TRINITY_DN8409_c0_g1_i9.p2	12	12	17	45	71	51	17	7	6
TRINITY_DN8187_c0_g1_i12.p1	130	113	151	372	295	216	150	153	149
TRINITY_DN9635_c0_g1_i1.p2	10	7	16	72	61	28	14	15	19
TRINITY_DN3658_c0_g1_i14.p1	42	21	39	380	651	322	187	115	90
TRINITY_DN90_c0_g4_i9.p1	233	537	241	3972	2831	2480	1657	1422	1205
TRINITY_DN304_c0_g1_i5.p2	86	74	133	518	388	1140	159	203	182
TRINITY_DN1025_c2_g1_i3.p1	113	75	142	1175	1024	1109	231	93	263
TRINITY_DN5822_c3_g1_i2.p1	101	158	118	455	476	808	178	133	190
TRINITY_DN2543_c1_g2_i1.p1	61	24	58	526	658	479	212	101	101
TRINITY_DN123815_c0_g1_i1.p1	0	0	0	23	19	39	0	0	0
TRINITY_DN80661_c0_g1_i4.p1	4	11	19	1834	1382	1504	28	15	29
TRINITY_DN218_c0_g3_i1.p1	253	236	340	1968	1438	596	219	609	435
TRINITY_DN2657_c0_g1_i12.p1	4	3	44	1635	2108	1451	19	23	73
TRINITY_DN2567_c0_g1_i18.p2	101	108	123	572	336	285	205	174	150
TRINITY_DN17143_c0_g3_i10.p1	0	0	0	82	65	49	0	0	0
TRINITY_DN1578_c1_g1_i5.p1	1183	1847	1525	5686	6679	8371	3368	2841	2511
TRINITY_DN21318_c0_g1_i3.p1	0	4	8	546	319	93	9	1	0
TRINITY_DN12352_c0_g3_i1.p1	97	46	59	694	892	830	91	157	85
TRINITY_DN27438_c0_g1_i15.p1	0	0	0	116	19	10	0	0	0
TRINITY_DN47791_c0_g1_i3.p1	1	2	0	41	24	15	0	0	0
TRINITY_DN90_c0_g4_i2.p1	182	317	218	2344	1636	1258	842	782	649
TRINITY_DN4043_c0_g1_i4.p1	5106	4635	3950	9298	9557	10227	5495	4973	4868
TRINITY_DN7243_c0_g1_i4.p1	1052	1374	1484	2705	2531	2551	712	1041	1632
TRINITY_DN626_c0_g1_i2.p1	16	21	17	428	346	246	118	67	83
TRINITY_DN20248_c1_g1_i3.p1	2009	1855	3721	5618	5440	5125	2309	2542	2175
TRINITY_DN22221_c0_g1_i3.p1	0	0	0	359	156	63	0	0	0
TRINITY_DN626_c0_g1_i6.p1	6	6	7	124	91	74	25	26	18
TRINITY_DN626_c0_g1_i6.p3	6	6	7	124	91	74	25	26	18
TRINITY_DN626_c0_g2_i1.p1	213	228	295	966	911	742	323	406	500
TRINITY_DN3320_c0_g1_i9.p1	6	81	54	1179	1015	1513	395	474	263
TRINITY_DN558_c1_g1_i10.p2	160	142	203	558	503	270	192	142	145
TRINITY_DN15366_c0_g1_i6.p1	0	0	0	1482	3510	2306	45	102	15
TRINITY_DN5176_c0_g1_i6.p1	676	641	856	4615	3365	1837	1071	1745	1365
TRINITY_DN4590_c0_g1_i18.p1	104	207	101	774	537	368	214	234	228
TRINITY_DN11219_c0_g1_i5.p3	46	34	65	159	138	127	60	42	57
TRINITY_DN3208_c0_g1_i3.p3	7	7	5	250	213	83	56	44	61
TRINITY_DN618_c0_g1_i2.p1	3151	2882	3855	8280	16861	7206	5831	3400	4050
TRINITY_DN11901_c0_g1_i2.p1	0	0	0	111	186	210	0	0	2
TRINITY_DN8225_c0_g2_i8.p1	45	109	76	1950	1812	1344	1142	855	647
TRINITY_DN618_c0_g1_i6.p1	5036	4389	6021	9270	16163	7667	6526	4328	5618
TRINITY_DN28374_c0_g1_i5.p1	23	20	38	282	188	128	19	29	20
TRINITY_DN28374_c0_g1_i5.p3	34	24	54	375	1335	672	30	47	34
TRINITY_DN28374_c0_g1_i5.p2	27	21	44	291	298	180	24	36	26
TRINITY_DN28374_c0_g1_i1.p4	17	11	25	141	256	122	17	22	22
TRINITY_DN24497_c0_g1_i1.p1	13	8	7	1117	830	2484	508	155	220
TRINITY_DN28374_c0_g1_i1.p3	20	12	29	155	462	415	20	27	27
TRINITY_DN28374_c0_g1_i1.p2	14	10	21	136	205	94	14	18	18
TRINITY_DN23186_c0_g1_i10.p1	2	2	2	141	63	33	4	1	2
TRINITY_DN38212_c0_g1_i6.p1	12	9	15	69	68	27	2	7	2
TRINITY_DN3472_c0_g2_i7.p2	79	118	106	237	181	147	82	77	88
TRINITY_DN12635_c0_g3_i2.p2	0	9	20	157	102	117	54	43	52
TRINITY_DN4581_c0_g1_i7.p1	83	83	133	429	460	296	129	124	123
TRINITY_DN6192_c0_g1_i2.p1	11	13	25	168	63	59	22	14	16
TRINITY_DN4794_c1_g1_i1.p1	58	67	89	2156	2107	1832	861	535	286
TRINITY_DN2484_c0_g2_i1.p1	2805	3936	4473	32140	29776	25948	12609	11288	12241
TRINITY_DN16815_c1_g1_i1.p1	32	89	56	967	4230	3460	100	22	102
TRINITY_DN29015_c0_g1_i1.p1	0	0	0	39	10	10	0	0	0
TRINITY_DN23135_c0_g1_i4.p1	0	0	0	333	135	55	0	0	1
TRINITY_DN1303_c0_g1_i2.p1	789	1162	1389	5563	5091	5734	2118	2682	2868
TRINITY_DN6987_c0_g1_i5.p1	7	66	39	3406	8844	7872	519	95	105
TRINITY_DN1679_c0_g1_i8.p1	53	78	122	565	428	233	176	97	99
TRINITY_DN8885_c0_g1_i10.p1	14	25	39	123	130	78	57	31	42
TRINITY_DN9391_c0_g1_i12.p2	0	0	0	119	16	6	0	0	0
TRINITY_DN1626_c0_g1_i3.p1	365	350	236	1846	1459	1212	531	854	633
TRINITY_DN4794_c1_g2_i1.p1	475	469	552	4802	4298	3415	2392	2787	1682
TRINITY_DN9089_c0_g1_i4.p1	25	14	29	174	171	32	18	13	12
TRINITY_DN7480_c0_g1_i2.p2	0	4	14	340	313	180	70	32	111
TRINITY_DN319_c0_g1_i5.p2	0	0	2	857	661	305	39	32	19
TRINITY_DN46467_c0_g1_i2.p1	0	0	0	20	20	46	0	0	0
TRINITY_DN27252_c0_g1_i1.p1	0	0	0	61	8	9	0	0	0
TRINITY_DN46760_c0_g1_i2.p1	3	4	5	102	65	71	20	8	6
TRINITY_DN6099_c0_g1_i1.p1	4356	4303	5120	8444	11670	9231	5111	5326	4589
TRINITY_DN5682_c0_g2_i4.p1	68	124	78	370	341	291	199	169	174
TRINITY_DN3161_c0_g1_i5.p3	0	0	0	149	0	44	0	0	0
TRINITY_DN3161_c0_g1_i5.p2	0	0	0	149	0	44	0	0	0
TRINITY_DN26067_c0_g4_i1.p1	0	0	0	43	18	27	2	0	0
TRINITY_DN27252_c0_g1_i5.p1	0	0	0	47	26	4	0	0	0
TRINITY_DN8885_c0_g1_i1.p1	15	21	33	125	137	80	57	30	47
TRINITY_DN19207_c0_g1_i3.p1	81	56	48	194	209	92	75	63	76
TRINITY_DN12720_c1_g1_i3.p1	640	511	557	1606	1833	866	657	584	530
TRINITY_DN7824_c1_g1_i3.p1	53	55	108	795	609	663	129	118	289
TRINITY_DN3162_c0_g1_i1.p1	0	0	0	1887	3034	4202	0	0	0
TRINITY_DN2720_c0_g1_i5.p2	55	43	59	123	111	60	43	45	47
TRINITY_DN27979_c0_g1_i6.p1	7	4	7	111	128	195	2	15	4
TRINITY_DN153079_c0_g1_i1.p1	0	0	0	33	63	86	10	4	0
TRINITY_DN31927_c0_g2_i2.p1	43	31	58	186	139	85	45	33	40
TRINITY_DN739_c0_g1_i5.p1	1605	1896	1782	4671	4373	4364	2854	2070	2010
TRINITY_DN215_c0_g1_i6.p1	1700	2383	1318	4372	4134	3823	1252	1620	1665
TRINITY_DN9001_c0_g1_i7.p1	651	679	998	2970	2436	2653	1079	1680	1335
TRINITY_DN626_c0_g2_i2.p1	201	232	285	950	890	715	308	412	464
TRINITY_DN7824_c1_g1_i5.p1	13	20	30	391	293	221	48	57	88
TRINITY_DN11463_c0_g1_i3.p1	74	81	130	593	723	750	192	158	147
TRINITY_DN626_c0_g2_i6.p1	101	94	130	427	386	330	156	194	238
TRINITY_DN21988_c0_g1_i1.p1	5	6	5	88	39	68	8	19	12
TRINITY_DN12319_c0_g2_i3.p1	146	221	166	437	583	209	92	72	171
TRINITY_DN21224_c0_g1_i12.p3	0	0	0	20	11	30	0	0	0
TRINITY_DN4625_c0_g1_i9.p1	90	81	99	233	405	335	126	153	132
TRINITY_DN21803_c0_g1_i5.p1	11	17	18	355	347	432	98	92	111
TRINITY_DN4226_c0_g1_i12.p1	285	262	249	456	619	358	295	221	174
TRINITY_DN143500_c0_g1_i1.p3	0	0	0	33	15	5	0	0	0
TRINITY_DN14015_c0_g1_i8.p1	0	0	2	60	18	25	1	0	2
TRINITY_DN4046_c0_g2_i2.p1	0	0	0	538	422	325	3	0	4
TRINITY_DN1503_c1_g2_i4.p1	1750	1999	1620	15412	18447	7400	2792	2508	2283
TRINITY_DN6399_c0_g2_i10.p1	98	132	130	428	297	303	139	141	146
TRINITY_DN10608_c0_g1_i1.p1	0	0	0	1219	223	388	38	2	31
TRINITY_DN314_c0_g1_i6.p6	126	94	147	357	328	190	138	160	128
TRINITY_DN314_c0_g1_i6.p3	133	99	175	434	402	236	148	198	149
TRINITY_DN5663_c0_g1_i4.p1	312	522	1277	9351	11611	9482	5836	6018	5003
TRINITY_DN5972_c0_g1_i1.p1	505	1530	817	2626	3492	1600	1019	1312	1366
TRINITY_DN4865_c0_g1_i1.p1	0	0	0	195	180	131	0	0	0
TRINITY_DN1264_c0_g1_i9.p1	383	478	292	1966	2165	1218	1023	926	783
TRINITY_DN1086_c0_g1_i3.p2	56	73	119	456	671	646	285	329	279
TRINITY_DN2222_c1_g2_i5.p1	360	407	497	1152	1581	1234	665	712	576
TRINITY_DN21966_c0_g1_i2.p1	0	0	0	114	113	49	9	10	0
TRINITY_DN1370_c0_g1_i2.p1	4	20	10	542	906	386	165	39	25
TRINITY_DN24866_c0_g1_i1.p1	0	1	0	24	14	19	0	0	1
TRINITY_DN10803_c0_g1_i1.p1	387	510	619	3328	2973	3060	1405	1354	1696
TRINITY_DN6678_c0_g2_i1.p1	297	166	153	2782	2788	1774	1691	1181	1020
TRINITY_DN11960_c0_g1_i16.p1	11	11	27	116	100	53	25	20	9
TRINITY_DN27074_c0_g1_i4.p1	0	0	0	55	21	19	0	0	0
TRINITY_DN36_c0_g1_i3.p2	155	192	188	588	403	607	125	165	222
TRINITY_DN1325_c0_g1_i5.p1	184	121	185	543	1193	447	356	190	270
TRINITY_DN4482_c0_g1_i2.p1	26	31	36	173	159	248	69	66	74
TRINITY_DN1074_c1_g3_i4.p1	330	402	380	1880	1066	525	371	456	342
TRINITY_DN36_c0_g1_i1.p1	258	360	286	636	639	807	151	264	251
TRINITY_DN4782_c2_g1_i1.p1	0	0	0	363	325	378	143	35	20
TRINITY_DN3464_c0_g1_i14.p2	10	20	15	286	485	283	142	56	32
TRINITY_DN3274_c0_g2_i1.p1	118	184	247	1854	1100	2129	632	622	244
TRINITY_DN33872_c0_g1_i3.p1	0	2	2	482	181	248	5	0	3
TRINITY_DN17349_c0_g1_i1.p2	19	45	86	339	312	103	65	39	82
TRINITY_DN6088_c0_g1_i2.p1	99	47	143	400	391	689	160	211	207
TRINITY_DN3524_c0_g1_i1.p2	84	147	112	686	625	455	283	272	302
TRINITY_DN60531_c0_g1_i1.p1	0	0	0	43	33	15	0	0	0
TRINITY_DN2714_c0_g1_i2.p1	243	357	406	3801	2989	4334	363	460	398
TRINITY_DN7140_c0_g2_i3.p1	1249	1884	1736	4212	4564	2445	1614	2161	2126
TRINITY_DN58036_c1_g1_i3.p1	0	0	0	6	26	21	0	0	0
TRINITY_DN194_c1_g1_i4.p1	1434	1827	2201	14671	10797	8522	4000	5120	4104
TRINITY_DN1838_c0_g2_i2.p1	4	2	64	1312	905	208	52	6	17
TRINITY_DN20738_c0_g1_i2.p2	11	17	31	141	235	94	42	24	35
TRINITY_DN26593_c0_g1_i6.p2	88	96	93	249	259	226	131	148	125
TRINITY_DN20738_c0_g1_i6.p1	5	9	14	60	87	36	24	17	18
TRINITY_DN1425_c0_g1_i1.p1	301	242	203	1497	1279	1075	781	635	584
TRINITY_DN18235_c1_g2_i2.p1	0	4	0	186	194	224	4	6	0
TRINITY_DN9734_c0_g1_i3.p1	18	19	20	420	225	400	46	31	19
TRINITY_DN6609_c1_g2_i1.p1	72	101	113	1177	983	337	351	322	171
TRINITY_DN20825_c0_g1_i3.p1	2	14	6	56	76	94	16	20	20
TRINITY_DN9860_c1_g2_i2.p1	799	861	935	5117	4787	3205	1700	1444	1173
TRINITY_DN4571_c0_g3_i2.p1	54	48	60	149	152	145	33	24	69
TRINITY_DN38638_c0_g1_i1.p1	0	0	0	124	225	103	0	0	0
TRINITY_DN14648_c1_g1_i1.p2	0	2	3	515	391	372	130	24	88
TRINITY_DN2759_c0_g1_i23.p2	7	7	6	66	89	45	21	13	28
TRINITY_DN2759_c0_g1_i23.p3	7	7	6	66	89	45	21	13	28
TRINITY_DN2759_c0_g1_i23.p1	7	7	6	66	89	45	21	13	28
TRINITY_DN33101_c0_g1_i13.p2	0	0	2	64	45	7	0	3	1
TRINITY_DN24920_c0_g3_i2.p1	0	0	0	37	33	4	0	0	0
TRINITY_DN44957_c0_g1_i1.p1	0	0	0	75	8	18	0	0	0
TRINITY_DN5207_c0_g1_i1.p1	95	124	145	538	377	486	129	189	149
TRINITY_DN17104_c0_g1_i1.p1	576	437	369	1647	2453	1247	614	515	430
TRINITY_DN19412_c0_g2_i4.p1	0	0	0	47	40	23	0	0	1
TRINITY_DN12635_c0_g3_i4.p1	0	0	2	42	43	40	10	4	8
TRINITY_DN18581_c0_g1_i2.p1	343	155	261	714	2684	1028	349	443	466
TRINITY_DN464_c1_g1_i8.p1	139	104	111	397	542	208	147	197	115
TRINITY_DN4859_c0_g1_i1.p1	0	0	3	387	530	594	45	0	6
TRINITY_DN255_c0_g1_i2.p1	4	147	14	915	967	954	327	129	71
TRINITY_DN10686_c0_g1_i3.p1	0	3	1	63	42	58	9	19	9
TRINITY_DN9391_c0_g1_i14.p1	0	0	0	106	19	6	0	0	0
TRINITY_DN739_c0_g1_i4.p1	1303	1468	1378	3520	3416	3484	2168	1653	1455
TRINITY_DN8044_c1_g1_i1.p1	0	0	4	51	37	72	7	9	17
TRINITY_DN1441_c0_g1_i23.p1	0	0	0	287	166	64	0	0	2
TRINITY_DN1441_c0_g1_i23.p2	1	0	2	317	191	74	1	1	2
TRINITY_DN3576_c0_g1_i7.p1	0	0	0	24	32	19	0	0	0
TRINITY_DN6910_c0_g2_i5.p1	2	9	0	1070	722	274	23	2	64
TRINITY_DN8221_c0_g2_i1.p6	4	2	10	233	1369	736	80	74	58
TRINITY_DN26009_c0_g1_i3.p1	0	0	0	229	77	5	0	0	0
TRINITY_DN607_c0_g2_i9.p1	11	21	19	437	478	751	61	152	110
TRINITY_DN24761_c0_g1_i6.p1	49	10	64	1368	1077	1380	364	232	93
TRINITY_DN660_c0_g3_i1.p1	4345	4267	5469	14964	11511	15164	5907	8365	6133
TRINITY_DN1001_c0_g1_i9.p1	826	943	597	2529	2469	1265	983	1383	983
TRINITY_DN820_c0_g1_i7.p1	49	70	52	307	301	311	142	122	114
TRINITY_DN1441_c0_g1_i25.p2	1	0	2	245	169	65	1	0	3
TRINITY_DN8885_c0_g1_i3.p1	9	17	17	99	100	49	32	21	37
TRINITY_DN33872_c0_g1_i4.p1	0	2	2	787	319	504	14	0	7
TRINITY_DN959_c0_g1_i7.p1	45	481	166	2259	2107	773	245	377	719
TRINITY_DN1349_c0_g1_i8.p2	216	116	90	640	753	549	324	222	316
TRINITY_DN12352_c0_g3_i5.p1	49	27	41	505	682	613	79	123	58
TRINITY_DN8184_c0_g1_i2.p1	26	37	23	370	1494	524	30	21	32
TRINITY_DN25146_c0_g1_i8.p1	33	32	44	71	178	90	11	20	34
TRINITY_DN1939_c0_g1_i4.p1	650	677	856	1906	1405	1009	609	857	850
TRINITY_DN13928_c0_g2_i2.p1	547	629	729	1499	1260	1335	425	634	668
TRINITY_DN2620_c0_g3_i2.p1	157	223	191	3988	5048	6184	2089	1708	946
TRINITY_DN54032_c0_g1_i2.p1	2	0	0	141	60	6	0	0	0
TRINITY_DN820_c0_g1_i1.p1	50	43	51	269	291	289	150	163	98
TRINITY_DN2701_c1_g1_i1.p1	213	415	365	621	1071	1054	434	350	361
TRINITY_DN91108_c0_g1_i2.p1	0	0	0	59	11	16	0	0	0
TRINITY_DN4968_c0_g2_i11.p1	10	8	17	77	69	22	6	3	6
TRINITY_DN7627_c0_g2_i4.p2	50	65	32	689	368	403	248	147	103
TRINITY_DN475_c0_g2_i5.p1	369	524	462	798	1069	867	476	509	469
TRINITY_DN6709_c0_g1_i5.p1	10	7	14	169	195	62	14	28	7
TRINITY_DN4566_c0_g1_i10.p1	349	454	592	2438	2922	2517	1300	1122	1231
TRINITY_DN9704_c0_g1_i3.p1	263	178	259	1654	1300	898	263	293	236
TRINITY_DN4990_c0_g2_i2.p1	1337	1470	2097	5488	5028	5517	3129	3102	2661
TRINITY_DN7083_c1_g2_i1.p1	0	0	0	425	566	677	0	0	0
TRINITY_DN5973_c1_g1_i1.p2	464	758	845	1340	1708	2358	491	630	671
TRINITY_DN765_c1_g1_i6.p2	57	87	86	952	390	230	158	153	146
TRINITY_DN17475_c0_g1_i4.p1	0	4	0	162	104	36	10	0	2
TRINITY_DN4317_c0_g1_i4.p1	48	35	42	654	980	556	96	168	87
TRINITY_DN3193_c0_g1_i5.p1	12153	16148	19645	25390	28925	33753	14451	15856	15069
TRINITY_DN75343_c0_g1_i1.p1	2	0	0	47	18	5	0	0	0
TRINITY_DN2575_c0_g1_i3.p1	11	25	6	236	444	147	119	46	38
TRINITY_DN4376_c0_g1_i7.p1	461	779	649	1199	1090	1201	472	661	732
TRINITY_DN51836_c0_g1_i1.p2	0	0	0	118	20	13	0	0	0
TRINITY_DN6373_c0_g1_i1.p1	20	45	27	834	730	763	291	234	202
TRINITY_DN18673_c0_g1_i3.p2	3	0	1	159	123	142	23	21	5
TRINITY_DN626_c0_g1_i6.p2	6	6	7	124	91	74	25	26	18
TRINITY_DN2678_c0_g1_i3.p1	79	382	113	1018	1234	1586	351	216	129
TRINITY_DN1420_c0_g1_i2.p1	0	23	31	139	198	131	51	64	50
TRINITY_DN10485_c0_g1_i10.p2	0	1	0	62	12	19	1	0	3
TRINITY_DN1368_c0_g2_i1.p1	43	23	102	1904	2396	1207	502	383	291
TRINITY_DN13316_c0_g1_i5.p1	48	50	36	242	144	202	97	77	58
TRINITY_DN475_c0_g2_i1.p1	733	1004	1052	1921	2775	2244	1264	1229	1113
TRINITY_DN1370_c0_g1_i8.p3	4	17	6	450	750	325	153	46	22
TRINITY_DN27668_c0_g1_i2.p2	0	0	0	48	16	12	0	0	0
TRINITY_DN33101_c0_g1_i16.p1	0	0	0	115	68	24	0	2	1
TRINITY_DN15909_c0_g1_i1.p1	6	5	10	151	259	337	40	51	66
TRINITY_DN17627_c0_g1_i1.p1	0	3	0	174	35	50	8	10	2
TRINITY_DN1226_c0_g1_i3.p1	17	10	27	487	609	377	8	11	6
TRINITY_DN1068_c0_g1_i3.p1	0	12	9	185	148	130	41	66	63
TRINITY_DN1611_c0_g1_i5.p2	38	146	51	674	2300	946	350	335	410
TRINITY_DN4891_c1_g1_i1.p1	3634	4331	4820	12300	8768	7297	2936	4743	4678
TRINITY_DN1370_c0_g1_i13.p2	4	25	8	460	801	368	197	37	28
TRINITY_DN1370_c0_g1_i13.p1	3	18	5	394	737	324	140	27	19
TRINITY_DN9921_c0_g1_i2.p2	0	0	0	79	0	77	0	0	0
TRINITY_DN1963_c0_g2_i2.p1	1327	1531	1703	6205	4245	4275	1567	2121	2487
TRINITY_DN8602_c0_g1_i5.p1	18	42	40	160	143	273	23	30	26
TRINITY_DN3524_c0_g1_i6.p2	24	44	33	249	194	183	101	128	99
TRINITY_DN3772_c0_g1_i3.p2	0	0	0	190	207	42	0	2	0
TRINITY_DN3772_c0_g1_i3.p1	0	0	0	131	161	39	0	2	0
TRINITY_DN3412_c0_g1_i8.p1	591	701	754	2439	2589	2598	1678	973	1159
TRINITY_DN25067_c0_g2_i1.p1	0	0	0	18	36	50	0	0	0
TRINITY_DN1851_c0_g1_i1.p1	5	10	5	84	201	112	20	9	3
TRINITY_DN84348_c0_g1_i1.p2	0	0	0	60	4	9	0	0	0
TRINITY_DN1744_c2_g1_i7.p1	3775	4894	2071	39024	46827	36959	20142	12457	9635
TRINITY_DN50064_c0_g1_i3.p1	0	0	0	31	9	66	0	2	3
TRINITY_DN15138_c0_g1_i1.p1	0	0	12	263	153	156	0	8	16
TRINITY_DN283_c0_g1_i12.p1	293	329	307	962	1534	1514	400	381	302
TRINITY_DN5465_c0_g1_i3.p2	1245	853	918	3059	3110	3036	1396	1505	917
TRINITY_DN5465_c0_g1_i3.p1	358	779	803	1161	1400	1529	482	650	656
TRINITY_DN4216_c1_g1_i3.p1	38	22	52	2105	3741	8297	258	659	74
TRINITY_DN3445_c2_g1_i2.p2	580	588	778	1397	1739	1900	934	839	844
TRINITY_DN85334_c0_g1_i1.p1	0	0	0	15	15	26	0	0	0
TRINITY_DN5635_c0_g2_i3.p1	131	169	145	659	723	556	107	341	135
TRINITY_DN4123_c0_g1_i2.p2	2	5	0	164	128	121	14	7	4
TRINITY_DN10456_c0_g1_i1.p1	8788	7958	8876	36354	30842	37305	14193	3932	6434
TRINITY_DN6815_c0_g1_i2.p1	0	0	0	156	110	105	11	1	0
TRINITY_DN2771_c0_g1_i1.p1	118	62	123	397	366	148	146	88	114
TRINITY_DN11463_c0_g1_i4.p1	54	63	73	223	262	320	91	101	74
TRINITY_DN19412_c0_g2_i6.p1	0	0	2	63	29	15	0	0	0
TRINITY_DN41549_c0_g1_i5.p1	249	210	212	744	1097	900	385	379	281
TRINITY_DN12686_c1_g1_i2.p1	6	8	4	162	204	212	88	58	79
TRINITY_DN684_c0_g1_i13.p1	179	255	291	419	570	538	178	193	241
TRINITY_DN6884_c0_g1_i13.p1	192	197	305	466	468	476	130	175	186
TRINITY_DN1816_c2_g1_i1.p2	0	10	0	461	1196	1316	194	91	183
TRINITY_DN1816_c2_g1_i1.p3	4	12	34	421	869	1574	201	92	168
TRINITY_DN6815_c0_g1_i8.p1	0	0	0	263	142	116	6	7	2
TRINITY_DN1394_c0_g1_i8.p1	31	34	42	919	638	998	300	374	100
TRINITY_DN6567_c0_g1_i4.p1	171	194	279	606	489	302	243	231	234
TRINITY_DN8328_c0_g1_i1.p1	119	651	374	1438	1556	1644	700	454	789
TRINITY_DN4371_c1_g1_i16.p2	397	452	358	1299	1127	1516	745	568	552
TRINITY_DN4371_c1_g1_i16.p1	377	410	345	1136	1053	1126	628	527	497
TRINITY_DN414_c0_g3_i10.p1	64	44	65	161	180	85	0	0	0
TRINITY_DN2386_c1_g1_i10.p1	14	11	13	142	179	128	23	26	28
TRINITY_DN2386_c1_g1_i10.p3	14	11	13	142	179	128	23	26	28
TRINITY_DN2386_c1_g1_i10.p2	14	11	13	142	179	128	23	26	28
TRINITY_DN4853_c2_g1_i1.p1	8	2	0	2802	3093	5168	819	110	57
TRINITY_DN16616_c0_g1_i4.p1	0	0	0	38	74	62	0	0	0
TRINITY_DN2516_c1_g1_i9.p1	181	510	285	1052	650	668	368	384	395
TRINITY_DN194_c1_g3_i5.p1	282	294	328	942	891	963	571	445	439
TRINITY_DN17897_c0_g1_i4.p1	0	0	0	51	49	9	1	4	2
TRINITY_DN21224_c0_g1_i1.p1	0	0	0	10	9	39	0	0	0
TRINITY_DN9261_c0_g1_i3.p1	150	130	179	776	1126	885	409	386	279
TRINITY_DN10507_c0_g1_i2.p1	21	42	25	106	105	114	33	35	29
TRINITY_DN464_c0_g1_i7.p1	0	0	0	66	65	39	0	0	0
TRINITY_DN2874_c0_g1_i17.p1	47	68	53	473	342	261	171	141	84
TRINITY_DN2874_c0_g1_i17.p2	58	79	61	583	417	360	226	156	106
TRINITY_DN9353_c0_g1_i5.p1	0	49	0	13400	16789	17173	135	28	57
TRINITY_DN9353_c0_g1_i5.p2	0	50	1	17202	19952	20702	136	34	58
TRINITY_DN10686_c0_g1_i1.p1	0	3	1	56	51	72	9	10	10
TRINITY_DN770_c1_g1_i1.p1	113	225	198	331	460	703	69	175	106
TRINITY_DN4081_c0_g1_i1.p1	17	40	51	266	317	362	144	158	84
TRINITY_DN1425_c0_g1_i4.p1	292	233	210	1494	1308	1070	801	634	590
TRINITY_DN1165_c0_g1_i4.p2	88	114	114	604	1157	609	217	175	176
TRINITY_DN6451_c0_g1_i4.p1	8	78	45	1430	2788	1898	126	16	76
TRINITY_DN4638_c0_g1_i9.p3	150	122	136	883	959	428	358	301	277
TRINITY_DN1841_c0_g1_i6.p1	338	311	507	1362	1557	1106	762	544	389
TRINITY_DN1264_c0_g1_i6.p1	45	41	31	217	323	239	120	100	144
TRINITY_DN4638_c0_g1_i9.p2	150	122	136	883	959	428	358	301	277
TRINITY_DN14336_c0_g1_i3.p1	0	0	0	141	151	139	31	26	30
TRINITY_DN4959_c0_g1_i2.p1	0	0	5	99	141	213	13	32	37
TRINITY_DN28072_c0_g1_i1.p1	0	0	0	109	97	39	7	0	0
TRINITY_DN4794_c1_g1_i5.p1	51	65	78	1255	1484	1347	669	421	214
TRINITY_DN51181_c0_g1_i4.p2	110	204	130	536	417	666	206	232	235
TRINITY_DN10068_c0_g1_i3.p2	3	2	3	38	17	11	1	0	0
TRINITY_DN8466_c1_g1_i2.p1	574	540	441	5144	19290	16714	3766	2586	3245
TRINITY_DN3524_c0_g1_i10.p2	47	173	82	412	369	320	204	211	197
TRINITY_DN2925_c0_g1_i7.p1	11681	11368	10955	18222	20062	21665	8877	11395	11094
TRINITY_DN4715_c0_g1_i1.p1	7	2	45	1725	1506	1068	224	248	107
TRINITY_DN28374_c0_g1_i1.p1	13	9	19	143	173	73	12	15	15
TRINITY_DN5694_c0_g1_i6.p1	11	7	15	4623	2448	926	184	107	151
TRINITY_DN1679_c1_g1_i5.p1	87	80	54	451	482	174	132	175	147
TRINITY_DN5912_c0_g1_i2.p2	10	2	3	390	437	166	99	109	52
TRINITY_DN5912_c0_g1_i2.p1	7	2	0	363	404	155	72	114	46
TRINITY_DN37384_c2_g1_i2.p1	10	5	9	144	107	100	20	51	40
TRINITY_DN3438_c1_g2_i1.p1	0	26	48	697	480	332	141	108	275
TRINITY_DN14015_c0_g1_i7.p1	0	0	0	18	21	10	0	0	0
TRINITY_DN396_c0_g1_i15.p2	70	102	57	301	217	262	103	75	50
TRINITY_DN31927_c0_g2_i4.p1	100	59	144	254	207	170	65	74	79
TRINITY_DN19385_c1_g1_i3.p1	6	0	2	122	135	99	30	4	18
TRINITY_DN11901_c0_g1_i1.p1	4	17	19	448	624	632	0	0	12
TRINITY_DN10039_c0_g1_i2.p1	533	638	936	1135	1439	1061	552	541	773
TRINITY_DN4317_c0_g1_i6.p1	32	43	51	805	1256	629	160	176	96
TRINITY_DN5694_c0_g1_i7.p1	136	294	160	1597	2134	2591	774	806	1039
TRINITY_DN6192_c0_g1_i1.p1	9	16	26	176	72	62	17	16	14
TRINITY_DN47_c0_g2_i1.p1	0	0	0	50	134	0	0	0	0
TRINITY_DN2021_c1_g1_i5.p1	44	85	90	410	517	396	263	255	193
TRINITY_DN3088_c0_g1_i1.p3	2	27	6	114	116	158	55	49	43
TRINITY_DN16086_c0_g1_i21.p1	201	243	265	1180	849	886	389	455	389
TRINITY_DN5171_c0_g1_i11.p1	190	195	183	1309	1281	983	581	388	295
TRINITY_DN3464_c0_g1_i19.p1	1	6	1	83	52	82	22	9	3
TRINITY_DN10319_c0_g1_i1.p1	36	66	55	250	230	189	46	42	61
TRINITY_DN10319_c0_g1_i1.p2	38	66	55	250	230	189	46	42	61
TRINITY_DN3405_c0_g2_i2.p1	39	46	68	254	226	350	56	49	57
TRINITY_DN4405_c0_g1_i3.p1	89	92	136	205	244	200	110	135	94
TRINITY_DN2369_c0_g1_i11.p1	256	282	367	691	760	641	324	430	329
TRINITY_DN8498_c0_g1_i2.p1	390	734	495	1269	2698	677	221	387	282
TRINITY_DN34119_c0_g1_i4.p1	0	0	0	74	24	58	0	0	0
TRINITY_DN1722_c1_g1_i4.p1	3461	3560	3573	9592	13816	25009	2569	3187	2929
TRINITY_DN1139_c3_g1_i6.p1	4	17	9	749	666	208	129	71	99
TRINITY_DN9001_c0_g1_i2.p1	853	1024	1274	4074	3439	3608	1596	2595	1949
TRINITY_DN21326_c0_g1_i5.p1	0	0	2	29	32	45	6	9	3
TRINITY_DN9602_c0_g1_i3.p1	61	45	42	124	167	113	25	51	53
TRINITY_DN31880_c0_g1_i7.p2	7	2	7	41	74	11	1	3	1
TRINITY_DN21103_c0_g1_i5.p2	0	0	0	108	12	4	0	0	0
TRINITY_DN63232_c0_g1_i2.p1	0	0	0	36	19	4	0	0	0
TRINITY_DN170_c0_g2_i1.p3	23	19	10	152	293	40	28	42	21
TRINITY_DN9789_c0_g1_i3.p1	7	14	16	199	169	93	27	66	12
TRINITY_DN1226_c0_g1_i1.p1	9	13	26	1033	1230	639	17	13	24
TRINITY_DN16238_c0_g1_i3.p1	0	0	0	141	47	31	14	9	4
TRINITY_DN4794_c1_g1_i8.p1	60	79	73	2014	1910	1689	766	549	261
TRINITY_DN2720_c0_g1_i6.p2	52	47	54	119	99	60	31	40	40
TRINITY_DN2759_c0_g1_i16.p1	7	10	16	135	232	91	59	26	47
TRINITY_DN8071_c1_g1_i6.p1	23	62	111	365	376	220	121	182	162
TRINITY_DN34847_c0_g2_i4.p3	2	4	6	77	122	146	13	15	7
TRINITY_DN8794_c0_g1_i8.p2	154	140	166	269	432	282	96	160	173
TRINITY_DN8794_c0_g1_i8.p1	124	98	153	222	284	227	95	120	120
TRINITY_DN6144_c0_g1_i6.p1	0	2	10	81	94	104	10	5	8
TRINITY_DN4794_c1_g1_i2.p1	47	68	70	964	1064	1072	507	359	192
TRINITY_DN1952_c0_g1_i6.p1	36	55	86	446	436	206	140	208	180
TRINITY_DN7285_c0_g1_i5.p1	264	442	479	2603	3262	3502	1547	995	922
TRINITY_DN4137_c0_g1_i2.p2	64	75	62	635	307	57	68	38	52
TRINITY_DN21019_c0_g2_i2.p1	22	7	3	216	226	162	16	18	2
TRINITY_DN7988_c0_g2_i2.p1	2	10	5	59	60	130	4	0	0
TRINITY_DN133591_c0_g1_i1.p1	0	0	0	26	8	11	0	0	0
TRINITY_DN21318_c0_g1_i1.p1	0	0	4	386	199	89	1	1	0
TRINITY_DN9582_c0_g2_i1.p1	128	121	224	708	705	349	264	266	173
TRINITY_DN58339_c0_g1_i1.p1	0	0	0	4	23	30	0	0	0
TRINITY_DN749_c0_g1_i8.p1	180	130	220	500	489	177	87	155	177
TRINITY_DN2513_c0_g2_i1.p1	293	478	468	1499	1618	1303	431	673	752
TRINITY_DN9782_c0_g1_i3.p1	8	16	4	515	616	1323	121	58	49
TRINITY_DN5439_c0_g1_i7.p1	266	450	447	860	1520	1363	563	377	362
TRINITY_DN684_c0_g1_i6.p1	42	44	59	110	100	94	43	46	45
TRINITY_DN5307_c0_g1_i2.p1	8	20	2	657	643	301	22	12	28
TRINITY_DN8151_c1_g1_i3.p1	0	0	2	789	639	2101	66	8	2
TRINITY_DN15731_c0_g1_i4.p3	2	3	0	27	42	26	4	7	4
TRINITY_DN16351_c0_g1_i1.p1	293	315	477	1193	972	688	272	345	346
TRINITY_DN26424_c0_g1_i9.p1	13	16	12	403	285	265	34	4	41
TRINITY_DN1982_c0_g1_i10.p1	33	25	46	157	217	106	54	29	69
TRINITY_DN2222_c1_g2_i8.p1	474	546	663	1564	2156	1605	862	910	795
TRINITY_DN872_c1_g2_i7.p1	1649	1649	1168	3257	3436	2482	1586	1551	1324
TRINITY_DN3240_c0_g1_i9.p1	37	46	63	378	266	195	113	144	133
TRINITY_DN62_c2_g1_i2.p1	225	191	218	556	512	326	198	302	166
TRINITY_DN5744_c0_g1_i13.p1	3	4	4	381	872	2080	171	111	19
TRINITY_DN143259_c0_g1_i1.p1	53	184	138	4426	3977	2437	827	616	648
TRINITY_DN9391_c0_g1_i9.p1	0	0	0	106	13	4	0	0	0
TRINITY_DN11134_c0_g1_i2.p1	1089	660	995	3431	2564	3470	496	544	823
TRINITY_DN12908_c0_g1_i2.p1	1	0	0	559	324	90	0	4	15
TRINITY_DN10249_c0_g1_i1.p2	21	55	56	208	197	108	34	50	33
TRINITY_DN101592_c0_g1_i1.p1	0	0	0	78	4	4	0	0	0
TRINITY_DN27190_c0_g1_i1.p1	0	0	0	201	74	0	0	0	0
TRINITY_DN9796_c1_g4_i1.p1	0	0	0	1533	929	1333	7	12	0
TRINITY_DN26497_c0_g2_i2.p1	27	102	102	4115	5001	6031	1588	878	457
TRINITY_DN11452_c2_g1_i5.p1	0	0	0	378	356	169	0	0	21
TRINITY_DN5026_c0_g1_i1.p1	0	0	0	112	0	63	0	0	0
TRINITY_DN23_c0_g2_i3.p1	440	424	445	949	1238	857	660	492	439
TRINITY_DN798_c0_g1_i1.p1	94	42	104	1060	1491	953	606	410	489
TRINITY_DN9705_c0_g1_i1.p1	39	32	69	247	377	522	125	174	95
TRINITY_DN414_c0_g3_i3.p2	60	55	92	198	404	120	82	76	53
TRINITY_DN18246_c0_g1_i1.p1	70	78	120	991	1795	429	124	136	202
TRINITY_DN30005_c0_g1_i2.p2	0	2	3	101	148	98	33	11	5
TRINITY_DN4512_c0_g1_i8.p1	27	35	63	345	299	123	46	99	65
TRINITY_DN3015_c0_g4_i3.p1	775	860	1045	3890	3063	2610	725	964	920
TRINITY_DN3464_c0_g1_i3.p1	23	27	13	491	411	366	202	78	50
TRINITY_DN27583_c0_g1_i1.p1	21	119	33	583	771	242	67	91	165
TRINITY_DN319_c0_g1_i5.p1	0	0	0	780	591	265	32	28	17
TRINITY_DN9925_c0_g2_i1.p1	2	0	3	93	48	106	17	15	7
TRINITY_DN207_c2_g1_i1.p1	664	737	438	2326	2002	1010	1102	929	814
TRINITY_DN5349_c0_g1_i1.p1	40	31	67	149	138	131	54	44	81
TRINITY_DN1151_c0_g1_i3.p1	81	94	155	205	419	244	119	75	103
TRINITY_DN18907_c0_g1_i3.p1	0	0	2	20	19	48	2	0	0
TRINITY_DN6678_c0_g2_i3.p1	383	192	152	3618	3638	2189	2050	1437	1389
TRINITY_DN396_c0_g1_i8.p2	84	102	61	290	306	257	108	82	52
TRINITY_DN4859_c0_g1_i2.p1	0	0	2	121	246	234	21	0	2
TRINITY_DN2714_c0_g1_i1.p1	372	607	715	5627	4636	6519	661	726	682
TRINITY_DN26009_c0_g1_i5.p1	0	0	0	277	61	8	0	0	0
TRINITY_DN406_c0_g1_i2.p1	403	393	594	2329	1694	929	571	721	696
TRINITY_DN28291_c0_g1_i1.p1	8	2	11	44	172	108	1	1	8
TRINITY_DN13659_c0_g1_i10.p2	48	51	57	190	218	99	42	68	57
TRINITY_DN13659_c0_g1_i10.p1	0	0	0	43	77	33	0	0	0
TRINITY_DN12075_c0_g2_i1.p1	30	26	16	40	113	181	23	22	16
TRINITY_DN1452_c0_g1_i6.p1	253	234	274	2836	3161	3487	1696	1319	1347
TRINITY_DN1656_c0_g1_i5.p1	4278	7975	4949	10354	23799	17846	5936	7900	5864
TRINITY_DN12319_c0_g2_i1.p1	108	185	166	369	476	212	69	69	163
TRINITY_DN12352_c0_g3_i2.p1	77	51	61	726	976	882	95	201	77
TRINITY_DN4619_c1_g1_i3.p1	49	38	83	338	558	284	146	159	142
TRINITY_DN820_c0_g1_i22.p1	48	64	45	332	312	284	122	138	131
TRINITY_DN7488_c0_g1_i10.p1	110	81	105	361	229	131	63	64	95
TRINITY_DN5914_c0_g1_i7.p1	107	75	132	289	230	156	106	111	113
TRINITY_DN626_c0_g1_i5.p1	6	6	7	127	91	75	19	24	17
TRINITY_DN626_c0_g1_i5.p3	6	6	7	127	91	75	19	24	17
TRINITY_DN626_c0_g1_i5.p2	6	6	7	127	91	75	19	24	17
TRINITY_DN34570_c0_g3_i1.p1	9	5	4	35	76	28	8	12	6
TRINITY_DN363_c1_g1_i2.p1	0	0	0	0	74	78	0	0	0
TRINITY_DN5497_c0_g1_i3.p1	43	91	124	576	434	369	206	131	228
TRINITY_DN4123_c0_g1_i3.p1	0	5	0	146	112	171	17	1	10
TRINITY_DN23587_c0_g1_i4.p1	98	117	82	1598	1236	1271	682	659	423
TRINITY_DN11896_c0_g1_i1.p2	5	3	3	655	764	407	5	17	18
TRINITY_DN2874_c0_g1_i9.p1	94	89	50	898	803	652	366	264	193
TRINITY_DN465_c1_g1_i1.p1	232	214	237	643	1326	810	22	91	140
TRINITY_DN5849_c0_g1_i4.p1	65	105	95	224	332	230	100	101	76
TRINITY_DN14290_c0_g2_i4.p1	12	19	35	76	59	64	11	21	21
TRINITY_DN1308_c0_g1_i8.p1	7	6	11	91	110	46	6	11	13
TRINITY_DN8216_c0_g1_i7.p1	7	68	22	883	353	158	73	65	49
TRINITY_DN8216_c0_g1_i3.p1	7	104	33	1171	571	248	115	97	65
TRINITY_DN1779_c1_g1_i1.p1	38	33	69	119	123	134	42	29	46
TRINITY_DN2369_c0_g1_i4.p1	259	263	330	776	863	680	359	450	344
TRINITY_DN1679_c0_g1_i3.p2	53	116	287	713	656	414	220	61	185
TRINITY_DN3371_c0_g1_i1.p1	961	1212	2345	5626	6258	8618	3285	2363	2940
TRINITY_DN14875_c0_g2_i5.p1	4	1	1	121	146	20	9	7	0
TRINITY_DN7843_c0_g2_i3.p1	2328	4731	3097	7673	6124	4778	3103	3397	3676
TRINITY_DN7988_c0_g1_i4.p1	39	110	29	540	686	793	347	154	228
TRINITY_DN12885_c0_g1_i4.p1	0	0	0	159	160	146	28	1	4
TRINITY_DN26823_c0_g1_i3.p1	0	2	0	11	10	37	0	0	0
TRINITY_DN3108_c0_g1_i3.p1	30	57	26	1106	1432	2273	526	408	274
TRINITY_DN19696_c0_g1_i1.p1	0	0	0	26	41	2	0	0	0
TRINITY_DN24761_c0_g1_i5.p2	10	2	11	370	316	412	144	74	22
TRINITY_DN24761_c0_g1_i5.p1	10	2	11	370	316	412	144	74	22
TRINITY_DN13827_c0_g1_i1.p1	1168	1436	1571	2378	2086	3022	1091	1384	1247
TRINITY_DN170_c0_g2_i3.p2	2	0	1	1427	2708	3935	532	389	105
TRINITY_DN170_c0_g2_i3.p1	2	0	0	1075	1941	3455	433	356	74
TRINITY_DN8063_c0_g1_i1.p1	0	5	0	272	146	158	0	0	0
TRINITY_DN6485_c0_g1_i4.p1	689	1000	1133	5808	4929	3209	1679	1669	916
TRINITY_DN102981_c1_g1_i1.p2	0	0	0	12	17	13	0	0	0
TRINITY_DN319_c0_g1_i6.p1	12	38	54	450	376	142	97	73	84
TRINITY_DN24326_c0_g1_i3.p1	12	14	12	96	94	33	25	20	15
TRINITY_DN11060_c0_g1_i4.p1	2	15	14	932	919	2474	468	129	109
TRINITY_DN38355_c0_g1_i7.p1	53	84	32	457	333	295	137	95	26
TRINITY_DN186_c3_g1_i1.p1	115	108	184	1017	846	856	409	216	184
TRINITY_DN8602_c0_g1_i1.p1	19	49	57	159	164	245	30	20	14
TRINITY_DN12249_c0_g1_i3.p1	9	8	7	53	32	29	10	7	4
TRINITY_DN27979_c0_g1_i1.p2	0	2	3	57	94	105	4	11	0
TRINITY_DN1891_c3_g1_i1.p1	241	267	407	1024	1380	1150	590	542	675
TRINITY_DN12921_c0_g1_i1.p1	30	14	27	73	61	60	24	22	30
TRINITY_DN157616_c0_g1_i1.p1	0	0	0	13	12	41	0	0	0
TRINITY_DN9782_c0_g1_i1.p1	22	27	8	1259	1730	3153	331	200	134
TRINITY_DN9962_c0_g1_i1.p1	328	368	622	1051	1738	1051	345	371	451
TRINITY_DN2706_c1_g1_i1.p1	740	1233	1610	3566	3439	6145	1901	1795	1542
TRINITY_DN6456_c2_g1_i3.p1	0	0	0	966	844	850	5	21	0
TRINITY_DN3325_c0_g1_i1.p1	0	0	0	95	126	40	0	0	0
TRINITY_DN3325_c0_g1_i1.p2	0	0	0	106	134	51	0	0	0
TRINITY_DN12178_c0_g1_i3.p1	204	527	393	1229	1172	1471	629	411	600
TRINITY_DN55636_c0_g1_i3.p1	0	2	10	545	300	497	61	41	47
TRINITY_DN2322_c0_g1_i12.p1	0	0	0	45	50	51	0	0	0
TRINITY_DN23989_c1_g1_i1.p1	463	600	590	2216	1632	802	640	781	770
TRINITY_DN74739_c0_g1_i1.p1	0	2	0	20	57	15	5	2	4
TRINITY_DN3717_c0_g1_i4.p1	23	6	12	204	158	102	48	46	24
TRINITY_DN7231_c0_g1_i2.p1	776	900	976	4098	4376	4214	1893	1776	1220
TRINITY_DN3524_c0_g1_i8.p1	98	305	237	1282	1136	976	533	432	526
TRINITY_DN13695_c0_g1_i3.p1	24	17	20	156	116	29	2	11	9
TRINITY_DN7627_c0_g2_i11.p1	18	22	13	278	252	186	114	55	43
TRINITY_DN7627_c0_g2_i11.p2	21	28	16	379	368	219	136	65	58
TRINITY_DN10565_c0_g2_i5.p1	101	73	130	449	359	229	170	181	87
TRINITY_DN8409_c0_g3_i5.p2	15	15	14	80	101	35	15	9	8
TRINITY_DN30743_c0_g1_i1.p1	0	0	0	536	53	4	0	0	0
TRINITY_DN5663_c0_g1_i7.p2	109	89	168	1123	1346	1190	668	687	592
TRINITY_DN19545_c0_g1_i2.p1	2	1	0	64	70	43	14	16	4
TRINITY_DN1325_c0_g1_i19.p2	100	75	171	290	1135	372	203	114	146
TRINITY_DN17923_c0_g1_i2.p1	5	61	22	536	792	199	39	60	45
TRINITY_DN11506_c0_g1_i1.p1	95	66	96	376	286	332	59	44	42
TRINITY_DN2396_c0_g1_i1.p1	141	281	260	1431	1416	1134	426	372	343
TRINITY_DN24371_c0_g1_i1.p1	4	0	4	755	821	1178	189	17	7
TRINITY_DN16086_c0_g1_i5.p1	85	88	113	340	270	283	117	182	129
TRINITY_DN10262_c0_g1_i3.p1	182	243	284	506	490	359	182	260	214
TRINITY_DN5353_c0_g1_i2.p1	28	77	26	258	149	151	15	42	12
TRINITY_DN55129_c0_g1_i2.p1	0	0	0	35	16	20	0	0	0
TRINITY_DN10262_c0_g1_i7.p1	268	324	358	864	711	622	179	289	259
TRINITY_DN3320_c0_g1_i4.p1	110	128	180	849	768	1232	332	439	290
TRINITY_DN2123_c1_g1_i2.p2	102	96	72	362	199	273	134	103	86
TRINITY_DN6797_c0_g1_i3.p1	957	929	539	2367	2070	1379	884	984	981
TRINITY_DN3177_c0_g1_i13.p1	5	4	2	138	136	47	17	16	9
TRINITY_DN5630_c0_g1_i9.p2	115	70	58	559	432	527	200	295	200
TRINITY_DN24761_c0_g1_i4.p1	98	18	31	396	330	325	131	95	56
TRINITY_DN24761_c0_g1_i4.p2	98	18	31	396	330	325	131	95	56
TRINITY_DN4590_c0_g1_i15.p1	121	204	110	947	617	427	213	258	272
TRINITY_DN3464_c0_g1_i5.p2	8	22	19	270	259	301	135	50	42
TRINITY_DN2018_c0_g2_i1.p1	523	653	746	2307	1843	2107	1061	1116	1035
TRINITY_DN1713_c0_g1_i6.p1	22	28	34	255	241	173	29	56	57
TRINITY_DN2949_c0_g1_i2.p2	376	285	352	1307	1247	540	435	560	386
TRINITY_DN1713_c0_g1_i4.p2	14	17	19	123	264	130	14	35	41
TRINITY_DN1841_c0_g1_i14.p1	305	301	499	1384	1586	1104	788	568	392
TRINITY_DN2582_c0_g1_i1.p1	0	0	0	121	0	76	0	0	0
TRINITY_DN10050_c0_g1_i3.p1	183	243	318	1452	2410	1237	153	201	240
TRINITY_DN29118_c0_g1_i1.p1	0	0	0	31	32	35	0	0	0
TRINITY_DN1079_c0_g3_i2.p1	36	49	38	1562	1365	1123	495	523	312
TRINITY_DN5682_c0_g1_i1.p2	81	129	70	496	371	378	212	83	86
TRINITY_DN859_c2_g2_i5.p1	6919	8598	8076	13130	19783	19297	6359	7945	7004
TRINITY_DN4255_c2_g1_i2.p1	150	180	161	1978	1615	1034	159	174	275
TRINITY_DN9647_c0_g1_i9.p2	84	79	43	394	281	405	174	166	137
TRINITY_DN9399_c0_g1_i1.p2	2	28	52	360	306	240	90	116	135
TRINITY_DN1668_c0_g1_i7.p1	94	97	121	386	292	261	87	123	189
TRINITY_DN1668_c0_g1_i7.p2	105	133	191	542	511	339	160	177	290
TRINITY_DN9961_c0_g1_i8.p2	23	37	38	535	236	254	38	84	65
TRINITY_DN9961_c0_g1_i8.p1	17	33	30	509	214	229	32	74	54
TRINITY_DN20738_c0_g1_i1.p1	6	17	8	111	133	23	17	12	20
TRINITY_DN20738_c0_g1_i1.p2	8	18	12	132	146	27	22	15	25
TRINITY_DN80443_c0_g1_i3.p1	55	47	75	198	198	68	40	12	42
TRINITY_DN2665_c0_g1_i6.p1	763	650	555	2247	2186	683	745	488	489
TRINITY_DN16616_c0_g1_i1.p1	0	0	0	17	46	17	0	0	0
TRINITY_DN6567_c0_g1_i1.p1	199	224	296	637	482	307	229	220	289
TRINITY_DN9467_c0_g1_i2.p3	55	56	161	1100	1516	1449	113	149	119
TRINITY_DN9467_c0_g1_i2.p1	48	47	111	871	1406	1211	82	131	99
TRINITY_DN9467_c0_g1_i6.p3	60	69	322	1145	1556	1412	111	166	131
TRINITY_DN9467_c0_g1_i6.p1	49	50	0	1009	1487	1358	92	146	110
TRINITY_DN6393_c0_g1_i7.p1	0	0	0	52	55	78	0	0	0
TRINITY_DN6373_c0_g1_i3.p1	37	36	13	486	465	491	246	182	123
TRINITY_DN36359_c0_g1_i1.p1	0	0	0	102	99	24	8	4	19
TRINITY_DN470_c0_g2_i1.p1	135	163	253	1443	1015	708	440	502	651
TRINITY_DN2145_c0_g1_i11.p2	312	357	311	801	681	332	273	277	300
TRINITY_DN2918_c1_g1_i14.p1	869	886	1292	5450	4329	5714	1645	2462	1572
TRINITY_DN194_c1_g4_i1.p1	127	179	278	1487	1041	806	265	500	452
TRINITY_DN5912_c0_g1_i7.p2	13	2	6	318	620	152	66	129	48
TRINITY_DN1841_c0_g1_i5.p1	308	309	498	1375	1568	1072	749	532	368
TRINITY_DN11413_c0_g1_i3.p1	86	136	138	755	774	1593	310	184	72
TRINITY_DN255_c0_g1_i1.p1	8	33	2	1101	1253	1321	348	86	61
TRINITY_DN38399_c0_g2_i2.p1	0	0	0	387	130	53	0	0	0
TRINITY_DN7502_c1_g1_i11.p1	4	8	12	455	391	247	96	46	47
TRINITY_DN43946_c0_g2_i4.p1	0	0	0	61	18	11	0	0	0
TRINITY_DN6910_c0_g2_i6.p1	0	1	0	53	36	16	1	0	2
TRINITY_DN14397_c0_g1_i2.p1	0	0	4	80	129	95	25	34	20
TRINITY_DN2657_c0_g1_i4.p1	1	4	1	483	476	302	8	0	13
TRINITY_DN10049_c0_g1_i3.p1	575	421	459	794	1446	676	453	430	442
TRINITY_DN6884_c0_g1_i9.p1	165	176	245	478	451	491	121	169	157
TRINITY_DN72139_c0_g1_i2.p1	0	0	0	66	37	4	0	0	0
TRINITY_DN130179_c0_g1_i1.p1	0	0	0	16	4	33	0	0	0
TRINITY_DN28984_c0_g1_i2.p1	3	1	0	45	45	39	7	10	2
TRINITY_DN2664_c0_g2_i2.p1	66	110	92	323	212	110	25	29	87
TRINITY_DN615_c0_g1_i7.p1	580	951	856	2093	2315	1633	821	868	1020
TRINITY_DN18678_c0_g1_i8.p1	2	3	6	47	50	35	6	4	6
TRINITY_DN1851_c0_g2_i7.p1	657	861	799	3361	3262	2724	1525	1783	1202
TRINITY_DN15822_c0_g4_i1.p1	18	38	108	213	202	166	73	67	110
TRINITY_DN3412_c0_g1_i6.p1	87	14	14	403	316	300	100	177	130
TRINITY_DN16107_c0_g1_i1.p1	0	0	2	111	96	40	7	5	5
TRINITY_DN4137_c0_g1_i8.p2	64	64	69	648	339	71	39	49	53
TRINITY_DN4327_c0_g1_i1.p1	465	348	553	2537	2098	532	538	397	491
TRINITY_DN1851_c0_g2_i3.p1	467	608	529	2345	3317	2068	571	534	502
TRINITY_DN1196_c0_g1_i1.p1	1176	2231	1986	10019	8650	3867	3799	3139	2918
TRINITY_DN4638_c0_g1_i5.p3	131	108	149	860	896	367	315	276	256
TRINITY_DN4638_c0_g1_i5.p2	131	108	149	860	896	367	315	276	256
TRINITY_DN4638_c0_g1_i5.p1	131	108	149	860	896	367	315	276	256
TRINITY_DN10359_c0_g1_i4.p1	40	27	25	682	424	606	111	218	30
TRINITY_DN67887_c0_g1_i1.p1	4	17	19	178	164	58	20	2	11
TRINITY_DN24451_c1_g2_i2.p3	11	8	12	38	56	85	16	11	13
TRINITY_DN13647_c0_g1_i3.p1	0	0	0	136	52	31	2	0	0
TRINITY_DN3717_c0_g1_i2.p1	20	2	5	744	699	287	256	197	109
TRINITY_DN17475_c0_g1_i7.p2	0	4	0	133	32	29	2	0	4
TRINITY_DN23920_c0_g1_i1.p2	6	3	6	59	49	49	17	17	12
TRINITY_DN9001_c0_g1_i1.p1	647	710	997	2893	2369	2611	1060	1608	1303
TRINITY_DN9961_c0_g1_i1.p2	25	47	47	644	275	310	51	168	121
TRINITY_DN8902_c0_g1_i6.p1	15	43	35	188	119	126	32	32	55
TRINITY_DN1162_c3_g1_i3.p1	222	385	321	946	13507	8701	1223	868	453
TRINITY_DN58785_c0_g2_i1.p2	0	0	0	95	116	0	0	0	0
TRINITY_DN14750_c1_g1_i2.p1	8	0	0	101	89	41	4	3	0
TRINITY_DN17158_c0_g1_i1.p1	163	158	254	447	404	302	196	242	150
TRINITY_DN5744_c0_g1_i9.p1	2	4	4	167	407	844	82	29	9
TRINITY_DN24459_c0_g1_i5.p1	27	24	50	384	299	454	103	101	97
[truncated: 1,447 more rows]

## Sheet: Table S6
Table S6. Rhizome-specific up-regulated gene annotation
Unigene_ID	PF_ID	Descirption
TRINITY_DN6485_c0_g1_i2.p1	PF19304.1	D-3-phosphoglycerate dehydrogenase intervening domain
TRINITY_DN7285_c0_g1_i9.p1	PF16912.7	Glucose dehydrogenase C-terminus
TRINITY_DN1093_c0_g1_i7.p1	PF12796.9	Ankyrin repeats (3 copies)
TRINITY_DN22809_c0_g1_i4.p1	PF08534.12	Redoxin
TRINITY_DN2648_c0_g2_i3.p1	PF06723.15	MreB/Mbl protein
TRINITY_DN9635_c0_g1_i1.p2	PF12722.9	High-temperature-induced dauer-formation protein
TRINITY_DN6567_c0_g1_i4.p1	PF12678.9	RING-H2 zinc finger domain
TRINITY_DN2717_c1_g2_i2.p1	PF02847.19	MA3 domain
TRINITY_DN13647_c0_g1_i3.p1	PF07883.13	Cupin domain
TRINITY_DN4130_c0_g1_i4.p1	PF00538.21	linker histone H1 and H5 family
TRINITY_DN8225_c0_g2_i4.p1	PF13676.8	TIR domain
TRINITY_DN2663_c1_g1_i4.p2	PF13921.8	Myb-like DNA-binding domain
TRINITY_DN6053_c0_g1_i2.p2	PF13857.8	Ankyrin repeats (many copies)
TRINITY_DN9234_c0_g1_i1.p1	PF05142.14	Domain of unknown function (DUF702)
TRINITY_DN29653_c0_g2_i1.p1	PF04359.16	Protein of unknown function (DUF493)
TRINITY_DN6884_c0_g1_i11.p1	PF18253.3	Hsp70-interacting protein N N-terminal domain
TRINITY_DN641_c0_g1_i3.p1	PF00183.20	Hsp90 protein
TRINITY_DN17749_c0_g1_i1.p1	PF12678.9	RING-H2 zinc finger domain
TRINITY_DN1321_c1_g3_i2.p1	PF04515.14	Plasma-membrane choline transporter
TRINITY_DN9480_c0_g1_i1.p1	PF05221.19	S-adenosyl-L-homocysteine hydrolase
TRINITY_DN2967_c0_g1_i2.p1	PF04427.20	Brix domain
TRINITY_DN15023_c0_g1_i4.p1	PF01645.19	Conserved region in glutamate synthase
TRINITY_DN1370_c0_g1_i8.p3	PF01490.20	Transmembrane amino acid transporter protein
TRINITY_DN7278_c0_g1_i6.p1	PF12697.9	Alpha/beta hydrolase family
TRINITY_DN5525_c0_g1_i3.p1	PF02791.19	DDT domain
TRINITY_DN15023_c0_g1_i3.p1	PF13230.8	Glutamine amidotransferases class-II
TRINITY_DN5204_c0_g1_i2.p1	PF07725.14	Leucine Rich Repeat
TRINITY_DN4590_c0_g1_i1.p1	PF01595.22	Cyclin M transmembrane N-terminal domain
TRINITY_DN4638_c0_g1_i8.p2	PF01823.21	MAC/Perforin domain
TRINITY_DN25694_c0_g1_i9.p1	PF00083.26	Sugar (and other) transporter
TRINITY_DN30234_c0_g1_i2.p1	PF01775.19	Ribosomal proteins 50S-L18Ae/60S-L20/60S-L18A
TRINITY_DN81656_c0_g1_i10.p3	PF11721.10	Malectin domain
TRINITY_DN6567_c0_g1_i4.p1	PF17123.7	RING-like zinc finger
TRINITY_DN51953_c0_g1_i1.p1	PF14416.8	PMR5 N terminal Domain
TRINITY_DN45707_c0_g1_i1.p1	PF00432.23	Prenyltransferase and squalene oxidase repeat
TRINITY_DN5302_c0_g2_i10.p2	PF07714.19	Protein tyrosine and serine/threonine kinase
TRINITY_DN8848_c0_g1_i2.p2	PF13661.8	2OG-Fe(II) oxygenase superfamily
TRINITY_DN1227_c0_g2_i3.p1	PF05406.17	WGR domain
TRINITY_DN32250_c0_g1_i1.p1	PF13679.8	Methyltransferase domain
TRINITY_DN3772_c0_g1_i3.p1	PF00106.27	short chain dehydrogenase
TRINITY_DN4014_c0_g1_i1.p1	PF00847.22	AP2 domain
TRINITY_DN5302_c0_g2_i1.p2	PF00069.27	Protein kinase domain
TRINITY_DN4216_c1_g1_i1.p1	PF00011.23	Hsp20/alpha crystallin family
TRINITY_DN1888_c0_g3_i4.p2	PF02183.20	Homeobox associated leucine zipper
TRINITY_DN29653_c0_g2_i1.p1	PF20147.1	Crinkler effector protein N-terminal domain
TRINITY_DN11991_c1_g2_i5.p1	PF13041.8	PPR repeat family
TRINITY_DN136_c0_g2_i1.p2	PF03321.15	GH3 auxin-responsive promoter
TRINITY_DN13659_c0_g1_i12.p1	PF14622.8	Ribonuclease-III-like
TRINITY_DN3434_c0_g1_i3.p1	PF13019.8	Silencing defective 2 N-terminal ubiquitin domain
TRINITY_DN3062_c1_g1_i4.p1	PF00022.21	Actin
TRINITY_DN3198_c0_g1_i1.p1	PF10302.11	DUF2407 ubiquitin-like domain
TRINITY_DN3815_c0_g1_i15.p1	PF00635.28	MSP (Major sperm protein) domain
TRINITY_DN10227_c0_g1_i12.p2	PF13918.8	PLD-like domain
TRINITY_DN1441_c0_g1_i18.p1	PF00847.22	AP2 domain
TRINITY_DN4061_c0_g1_i3.p1	PF16191.7	Ubiquitin-activating enzyme E1 four-helix bundle
TRINITY_DN791_c0_g1_i15.p2	PF18044.3	CCCH-type zinc finger
TRINITY_DN5972_c0_g1_i1.p1	PF00155.23	Aminotransferase class I and II
TRINITY_DN27438_c0_g1_i15.p1	PF13840.8	ACT domain
TRINITY_DN2663_c1_g1_i4.p2	PF13873.8	Myb/SANT-like DNA-binding domain
TRINITY_DN7488_c0_g1_i2.p1	PF07714.19	Protein tyrosine and serine/threonine kinase
TRINITY_DN8885_c0_g1_i13.p1	PF00069.27	Protein kinase domain
TRINITY_DN464_c1_g1_i16.p2	PF12212.10	PAZ domain
TRINITY_DN6393_c0_g1_i4.p1	PF06955.14	Xyloglucan endo-transglycosylase (XET) C-terminus
TRINITY_DN1151_c0_g1_i2.p1	PF07714.19	Protein tyrosine and serine/threonine kinase
TRINITY_DN4187_c0_g3_i1.p1	PF02401.20	LytB protein
TRINITY_DN3062_c1_g1_i3.p1	PF00022.21	Actin
TRINITY_DN6538_c1_g1_i1.p1	PF00183.20	Hsp90 protein
TRINITY_DN1370_c0_g1_i2.p3	PF01490.20	Transmembrane amino acid transporter protein
TRINITY_DN6910_c0_g2_i7.p2	PF05142.14	Domain of unknown function (DUF702)
TRINITY_DN14980_c0_g1_i1.p1	PF04520.15	Senescence regulator
TRINITY_DN8462_c0_g1_i4.p1	PF00027.31	Cyclic nucleotide-binding domain
TRINITY_DN4453_c0_g1_i3.p1	PF10516.11	SHNi-TPR
TRINITY_DN2904_c0_g1_i3.p1	PF07714.19	Protein tyrosine and serine/threonine kinase
TRINITY_DN1224_c0_g1_i3.p1	PF08031.14	Berberine and berberine like
TRINITY_DN739_c0_g1_i4.p1	PF03109.18	ABC1 atypical kinase-like domain
TRINITY_DN1717_c0_g1_i1.p1	PF13513.8	HEAT-like repeat
TRINITY_DN3772_c0_g1_i5.p1	PF08659.12	KR domain
TRINITY_DN1449_c0_g1_i9.p1	PF13440.8	Polysaccharide biosynthesis protein
TRINITY_DN227_c0_g1_i3.p2	PF07725.14	Leucine Rich Repeat
TRINITY_DN1227_c0_g2_i3.p1	PF08063.14	PADR1 (NUC008) domain
TRINITY_DN17627_c0_g1_i1.p1	PF08031.14	Berberine and berberine like
TRINITY_DN18928_c0_g1_i5.p1	PF00067.24	Cytochrome P450
TRINITY_DN14750_c1_g1_i2.p1	PF07714.19	Protein tyrosine and serine/threonine kinase
TRINITY_DN4109_c0_g3_i2.p1	PF13516.8	Leucine Rich repeat
TRINITY_DN13827_c0_g1_i1.p1	PF00162.21	Phosphoglycerate kinase
TRINITY_DN4317_c0_g1_i8.p1	PF00183.20	Hsp90 protein
TRINITY_DN626_c0_g1_i5.p3	PF06414.14	Zeta toxin
TRINITY_DN3907_c0_g1_i13.p1	PF00407.21	Pathogenesis-related protein Bet v 1 family
TRINITY_DN64_c0_g1_i1.p1	PF03790.15	KNOX1 domain
TRINITY_DN3256_c0_g1_i12.p1	PF01070.20	FMN-dependent dehydrogenase
TRINITY_DN5334_c0_g2_i5.p1	PF03109.18	ABC1 atypical kinase-like domain
TRINITY_DN754_c0_g1_i10.p1	PF03000.16	NPH3 family
TRINITY_DN20685_c0_g1_i1.p1	PF07725.14	Leucine Rich Repeat
TRINITY_DN5439_c0_g1_i4.p1	PF07859.15	alpha/beta hydrolase fold
TRINITY_DN2398_c0_g1_i13.p1	PF13513.8	HEAT-like repeat
TRINITY_DN130179_c0_g1_i1.p1	PF01545.23	Cation efflux family
TRINITY_DN6710_c0_g1_i16.p3	PF03193.18	RsgA GTPase
TRINITY_DN9390_c0_g1_i7.p1	PF11069.10	Cilia- and flagella-associated protein 298
TRINITY_DN10249_c0_g1_i4.p1	PF02458.17	Transferase family
TRINITY_DN14750_c1_g1_i2.p1	PF07725.14	Leucine Rich Repeat
TRINITY_DN1966_c0_g1_i1.p1	PF12353.10	Eukaryotic translation initiation factor 3 subunit G
TRINITY_DN4405_c0_g1_i3.p1	PF00977.23	Histidine biosynthesis protein
TRINITY_DN14750_c1_g1_i2.p1	PF08263.14	Leucine rich repeat N-terminal domain
TRINITY_DN10050_c0_g1_i3.p1	PF00183.20	Hsp90 protein
TRINITY_DN6449_c0_g1_i2.p1	PF12848.9	ABC transporter
TRINITY_DN4123_c0_g1_i3.p1	PF18290.3	Nudix hydrolase domain
TRINITY_DN1139_c3_g1_i6.p1	PF07714.19	Protein tyrosine and serine/threonine kinase
TRINITY_DN5257_c0_g1_i2.p1	PF01053.22	Cys/Met metabolism PLP-dependent enzyme
TRINITY_DN5972_c0_g1_i2.p1	PF00155.23	Aminotransferase class I and II
TRINITY_DN4453_c0_g1_i5.p1	PF10516.11	SHNi-TPR
TRINITY_DN7285_c0_g1_i13.p1	PF16912.7	Glucose dehydrogenase C-terminus
TRINITY_DN280_c0_g2_i1.p1	PF01134.24	Glucose inhibited division protein A
TRINITY_DN10227_c0_g1_i1.p2	PF13918.8	PLD-like domain
TRINITY_DN8885_c0_g1_i10.p1	PF03109.18	ABC1 atypical kinase-like domain
TRINITY_DN7929_c0_g2_i1.p2	PF07714.19	Protein tyrosine and serine/threonine kinase
TRINITY_DN27438_c0_g1_i15.p1	PF06234.14	Toluene-4-monooxygenase system protein B (TmoB)
TRINITY_DN8055_c0_g1_i7.p1	PF13921.8	Myb-like DNA-binding domain
TRINITY_DN6449_c0_g1_i6.p1	PF12848.9	ABC transporter
TRINITY_DN30059_c0_g1_i3.p1	PF06723.15	MreB/Mbl protein
TRINITY_DN11207_c0_g1_i2.p1	PF00538.21	linker histone H1 and H5 family
TRINITY_DN2714_c0_g1_i1.p1	PF12740.9	Chlorophyllase enzyme
TRINITY_DN18503_c0_g1_i1.p1	PF00512.27	His Kinase A (phospho-acceptor) domain
TRINITY_DN2077_c0_g1_i3.p1	PF07714.19	Protein tyrosine and serine/threonine kinase
TRINITY_DN3999_c1_g1_i1.p1	PF13191.8	AAA ATPase domain
TRINITY_DN1093_c0_g1_i7.p1	PF07714.19	Protein tyrosine and serine/threonine kinase
TRINITY_DN1425_c0_g1_i2.p1	PF13921.8	Myb-like DNA-binding domain
TRINITY_DN1722_c1_g1_i4.p1	PF00789.22	UBX domain
TRINITY_DN2665_c0_g1_i6.p1	PF08277.14	PAN-like domain
TRINITY_DN2895_c0_g1_i8.p1	PF00069.27	Protein kinase domain
TRINITY_DN6567_c0_g1_i4.p1	PF13639.8	Ring finger domain
TRINITY_DN13659_c0_g1_i2.p1	PF12212.10	PAZ domain
TRINITY_DN3015_c0_g4_i1.p1	PF01636.25	Phosphotransferase enzyme family
TRINITY_DN8902_c0_g1_i6.p1	PF00067.24	Cytochrome P450
TRINITY_DN3638_c0_g1_i2.p1	PF12894.9	Anaphase-promoting complex subunit 4 WD40 domain
TRINITY_DN754_c0_g1_i9.p1	PF03000.16	NPH3 family
TRINITY_DN10359_c0_g1_i1.p1	PF00326.23	Prolyl oligopeptidase family
TRINITY_DN21019_c0_g2_i1.p2	PF02365.17	No apical meristem (NAM) protein
TRINITY_DN18246_c0_g1_i1.p1	PF12799.9	Leucine Rich repeats (2 copies)
TRINITY_DN3434_c0_g1_i4.p1	PF20147.1	Crinkler effector protein N-terminal domain
TRINITY_DN3198_c0_g1_i1.p1	PF05031.14	Iron Transport-associated domain
TRINITY_DN38212_c0_g1_i6.p1	PF00069.27	Protein kinase domain
TRINITY_DN194_c1_g1_i3.p1	PF18444.3	RNA recognition motif
TRINITY_DN3772_c0_g1_i4.p2	PF08659.12	KR domain
TRINITY_DN14336_c0_g1_i9.p1	PF02365.17	No apical meristem (NAM) protein
TRINITY_DN6766_c0_g1_i5.p1	PF00226.33	DnaJ domain
TRINITY_DN8216_c0_g2_i1.p1	PF06507.15	Auxin response factor
TRINITY_DN1929_c0_g1_i1.p1	PF13246.8	Cation transport ATPase (P-type)
TRINITY_DN96_c0_g1_i2.p1	PF00447.19	HSF-type DNA-binding
TRINITY_DN5302_c0_g2_i10.p2	PF00069.27	Protein kinase domain
TRINITY_DN628_c0_g1_i5.p1	PF02985.24	HEAT repeat
TRINITY_DN19385_c1_g1_i3.p1	PF03791.15	KNOX2 domain
TRINITY_DN1139_c3_g1_i6.p1	PF07725.14	Leucine Rich Repeat
TRINITY_DN1851_c1_g1_i1.p1	PF06723.15	MreB/Mbl protein
TRINITY_DN464_c1_g1_i1.p1	PF14622.8	Ribonuclease-III-like
TRINITY_DN626_c0_g2_i2.p1	PF10533.11	Plant zinc cluster domain
TRINITY_DN90_c0_g4_i7.p1	PF01373.19	Glycosyl hydrolase family 14
TRINITY_DN5663_c0_g1_i4.p1	PF13450.8	NAD(P)-binding Rossmann-like domain
TRINITY_DN3434_c0_g1_i3.p1	PF18037.3	Ubiquitin-like domain
TRINITY_DN1308_c0_g1_i8.p1	PF04003.14	Dip2/Utp12 Family
TRINITY_DN8462_c0_g1_i2.p1	PF07885.18	Ion channel
TRINITY_DN4638_c0_g1_i9.p2	PF01823.21	MAC/Perforin domain
TRINITY_DN626_c0_g1_i6.p2	PF13671.8	AAA domain
TRINITY_DN6142_c0_g4_i1.p1	PF00226.33	DnaJ domain
TRINITY_DN975_c0_g1_i5.p1	PF02183.20	Homeobox associated leucine zipper
TRINITY_DN641_c0_g1_i2.p1	PF00183.20	Hsp90 protein
TRINITY_DN765_c1_g1_i5.p1	PF06813.15	Nodulin-like
TRINITY_DN7929_c0_g2_i6.p2	PF00069.27	Protein kinase domain
TRINITY_DN1289_c0_g2_i6.p1	PF03405.16	Fatty acid desaturase
TRINITY_DN15012_c1_g1_i1.p1	PF01556.20	DnaJ C terminal domain
TRINITY_DN25304_c0_g1_i1.p1	PF10458.11	Valyl tRNA synthetase tRNA binding arm
TRINITY_DN791_c0_g1_i5.p1	PF18345.3	Zinc finger domain
TRINITY_DN2904_c0_g1_i2.p1	PF07714.19	Protein tyrosine and serine/threonine kinase
TRINITY_DN23_c0_g2_i4.p1	PF06723.15	MreB/Mbl protein
TRINITY_DN9467_c0_g1_i6.p3	PF01070.20	FMN-dependent dehydrogenase
TRINITY_DN16086_c0_g1_i9.p3	PF04055.23	Radical SAM superfamily
TRINITY_DN6142_c0_g4_i1.p1	PF01556.20	DnaJ C terminal domain
TRINITY_DN19999_c0_g1_i3.p1	PF00191.22	Annexin
TRINITY_DN62114_c0_g1_i3.p1	PF00970.26	Oxidoreductase FAD-binding domain
TRINITY_DN62_c0_g2_i1.p1	PF01820.23	D-ala D-ala ligase N-terminus
TRINITY_DN6778_c1_g1_i2.p1	PF01443.20	Viral (Superfamily 1) RNA helicase
TRINITY_DN1709_c0_g2_i2.p1	PF00847.22	AP2 domain
TRINITY_DN9480_c0_g1_i4.p1	PF05221.19	S-adenosyl-L-homocysteine hydrolase
TRINITY_DN6099_c0_g1_i11.p1	PF00254.30	FKBP-type peptidyl-prolyl cis-trans isomerase
TRINITY_DN5912_c0_g1_i2.p1	PF07526.13	Associated with HOX
TRINITY_DN1264_c0_g1_i9.p1	PF04859.14	Plant protein of unknown function (DUF641)
TRINITY_DN464_c3_g2_i9.p1	PF00270.31	DEAD/DEAH box helicase
TRINITY_DN4272_c0_g1_i4.p1	PF06955.14	Xyloglucan endo-transglycosylase (XET) C-terminus
TRINITY_DN7285_c0_g1_i16.p1	PF13602.8	Zinc-binding dehydrogenase
TRINITY_DN25954_c0_g1_i19.p1	PF01027.22	Inhibitor of apoptosis-promoting Bax1
TRINITY_DN2759_c0_g1_i2.p2	PF08277.14	PAN-like domain
TRINITY_DN1713_c0_g1_i4.p2	PF14389.8	Leucine-zipper of ternary complex factor MIP1
TRINITY_DN1792_c2_g3_i3.p1	PF14372.8	Domain of unknown function (DUF4413)
TRINITY_DN4638_c0_g1_i16.p4	PF01823.21	MAC/Perforin domain
TRINITY_DN14750_c1_g1_i1.p1	PF07714.19	Protein tyrosine and serine/threonine kinase
TRINITY_DN20979_c0_g1_i4.p1	PF01926.25	50S ribosome-binding GTPase
TRINITY_DN9504_c1_g2_i2.p1	PF00226.33	DnaJ domain
TRINITY_DN13659_c0_g1_i12.p1	PF12212.10	PAZ domain
TRINITY_DN12249_c0_g1_i3.p1	PF00072.26	Response regulator receiver domain
TRINITY_DN29653_c0_g2_i1.p1	PF13840.8	ACT domain
TRINITY_DN11630_c0_g1_i2.p1	PF13625.8	Helicase conserved C-terminal domain
TRINITY_DN33101_c0_g1_i16.p1	PF03124.16	EXS family
TRINITY_DN765_c1_g1_i6.p2	PF07690.18	Major Facilitator Superfamily
TRINITY_DN38766_c0_g1_i1.p1	PF07725.14	Leucine Rich Repeat
TRINITY_DN739_c0_g1_i4.p1	PF07714.19	Protein tyrosine and serine/threonine kinase
TRINITY_DN6468_c0_g1_i1.p1	PF12937.9	F-box-like
TRINITY_DN26593_c0_g1_i3.p1	PF01704.20	UTP--glucose-1-phosphate uridylyltransferase
TRINITY_DN2369_c0_g1_i7.p1	PF03479.17	Plants and Prokaryotes Conserved (PCC) domain
TRINITY_DN6567_c0_g1_i2.p1	PF13639.8	Ring finger domain
TRINITY_DN11240_c0_g1_i3.p1	PF13672.8	Protein phosphatase 2C
TRINITY_DN177637_c0_g1_i1.p1	PF00899.23	ThiF family
TRINITY_DN34078_c0_g1_i3.p1	PF02466.21	Tim17/Tim22/Tim23/Pmp24 family
TRINITY_DN8602_c0_g1_i1.p1	PF01212.23	Beta-eliminating lyase
TRINITY_DN28374_c0_g1_i1.p2	PF00106.27	short chain dehydrogenase
TRINITY_DN1713_c0_g1_i2.p2	PF14389.8	Leucine-zipper of ternary complex factor MIP1
TRINITY_DN194_c1_g1_i1.p1	PF08777.13	RNA binding motif
TRINITY_DN615_c0_g1_i7.p1	PF08659.12	KR domain
TRINITY_DN5663_c0_g1_i7.p2	PF12831.9	FAD dependent oxidoreductase
TRINITY_DN9160_c0_g2_i1.p1	PF05496.14	Holliday junction DNA helicase RuvB P-loop domain
TRINITY_DN1449_c0_g1_i9.p1	PF13460.8	NAD(P)H-binding
TRINITY_DN13659_c0_g1_i13.p2	PF12212.10	PAZ domain
TRINITY_DN3434_c0_g1_i4.p1	PF04359.16	Protein of unknown function (DUF493)
TRINITY_DN3434_c0_g1_i3.p1	PF17963.3	Bacterial Ig domain
TRINITY_DN215_c1_g1_i10.p1	PF00135.30	Carboxylesterase family
TRINITY_DN1227_c0_g2_i6.p1	PF08063.14	PADR1 (NUC008) domain
TRINITY_DN6884_c0_g1_i9.p1	PF18253.3	Hsp70-interacting protein N N-terminal domain
TRINITY_DN2895_c0_g1_i7.p1	PF00069.27	Protein kinase domain
TRINITY_DN3815_c0_g1_i11.p2	PF00635.28	MSP (Major sperm protein) domain
TRINITY_DN5682_c0_g2_i2.p1	PF13921.8	Myb-like DNA-binding domain
TRINITY_DN754_c0_g1_i1.p2	PF03000.16	NPH3 family
TRINITY_DN1888_c0_g3_i3.p1	PF00046.31	Homeodomain
TRINITY_DN6884_c0_g1_i9.p1	PF13371.8	Tetratricopeptide repeat
TRINITY_DN2916_c1_g1_i4.p1	PF12315.10	Protein DA1
TRINITY_DN3592_c0_g1_i3.p1	PF01565.25	FAD binding domain
TRINITY_DN4137_c0_g1_i19.p2	PF00027.31	Cyclic nucleotide-binding domain
TRINITY_DN24184_c0_g1_i7.p1	PF19056.2	WD40 repeated domain
TRINITY_DN1289_c0_g2_i6.p3	PF18044.3	CCCH-type zinc finger
TRINITY_DN3325_c0_g1_i1.p2	PF17834.3	Beta-sandwich domain in beta galactosidase
TRINITY_DN13659_c0_g1_i10.p1	PF00035.28	Double-stranded RNA binding motif
TRINITY_DN1449_c0_g1_i9.p1	PF01370.23	NAD dependent epimerase/dehydratase family
TRINITY_DN6567_c0_g1_i2.p1	PF17123.7	RING-like zinc finger
TRINITY_DN194_c1_g4_i1.p1	PF18444.3	RNA recognition motif
TRINITY_DN4893_c1_g1_i1.p1	PF00011.23	Hsp20/alpha crystallin family
TRINITY_DN16078_c0_g1_i5.p1	PF14547.8	Hydrophobic seed protein
TRINITY_DN2513_c0_g2_i2.p1	PF00069.27	Protein kinase domain
TRINITY_DN14015_c0_g1_i9.p1	PF01643.19	Acyl-ACP thioesterase
TRINITY_DN5936_c3_g1_i1.p1	PF00266.21	Aminotransferase class-V
TRINITY_DN3434_c0_g1_i4.p1	PF00240.25	Ubiquitin family
TRINITY_DN7285_c0_g1_i13.p1	PF13602.8	Zinc-binding dehydrogenase
TRINITY_DN5970_c0_g1_i31.p3	PF00082.24	Subtilase family
TRINITY_DN2567_c0_g1_i18.p2	PF00403.28	Heavy-metal-associated domain
TRINITY_DN4042_c0_g2_i1.p1	PF00847.22	AP2 domain
TRINITY_DN3524_c0_g1_i7.p2	PF03106.17	WRKY DNA -binding domain
TRINITY_DN7285_c0_g1_i2.p1	PF08240.14	Alcohol dehydrogenase GroES-like domain
TRINITY_DN9467_c0_g1_i2.p3	PF01070.20	FMN-dependent dehydrogenase
TRINITY_DN2222_c0_g2_i3.p2	PF14372.8	Domain of unknown function (DUF4413)
TRINITY_DN2759_c0_g1_i2.p2	PF11883.10	Domain of unknown function (DUF3403)
TRINITY_DN3464_c0_g1_i15.p1	PF13671.8	AAA domain
TRINITY_DN7285_c0_g1_i13.p1	PF08240.14	Alcohol dehydrogenase GroES-like domain
TRINITY_DN1503_c1_g2_i4.p1	PF00012.22	Hsp70 protein
TRINITY_DN8055_c0_g1_i3.p1	PF13921.8	Myb-like DNA-binding domain
TRINITY_DN1349_c0_g1_i8.p2	PF02171.19	Piwi domain
TRINITY_DN5137_c1_g1_i2.p1	PF08282.14	haloacid dehalogenase-like hydrolase
TRINITY_DN966_c0_g2_i2.p1	PF12697.9	Alpha/beta hydrolase family
TRINITY_DN9635_c0_g1_i1.p2	PF09742.11	Dyggve-Melchior-Clausen syndrome protein
TRINITY_DN215_c0_g1_i6.p1	PF07859.15	alpha/beta hydrolase fold
TRINITY_DN464_c1_g1_i1.p1	PF00270.31	DEAD/DEAH box helicase
TRINITY_DN4566_c0_g1_i5.p1	PF03151.18	Triose-phosphate Transporter family
TRINITY_DN626_c0_g1_i4.p2	PF06414.14	Zeta toxin
TRINITY_DN558_c1_g1_i10.p2	PF13041.8	PPR repeat family
TRINITY_DN10359_c0_g1_i3.p1	PF07859.15	alpha/beta hydrolase fold
TRINITY_DN4638_c0_g1_i7.p2	PF01823.21	MAC/Perforin domain
TRINITY_DN15822_c0_g4_i1.p1	PF16796.7	Microtubule binding
TRINITY_DN2222_c1_g2_i5.p1	PF01762.23	Galactosyltransferase
TRINITY_DN1722_c1_g1_i1.p3	PF18039.3	UBA-like domain
TRINITY_DN6399_c0_g2_i9.p1	PF13561.8	Enoyl-(Acyl carrier protein) reductase
TRINITY_DN55129_c0_g1_i2.p1	PF08031.14	Berberine and berberine like
TRINITY_DN10123_c0_g1_i5.p1	PF01650.20	Peptidase C13 family
TRINITY_DN33436_c1_g1_i1.p1	PF07714.19	Protein tyrosine and serine/threonine kinase
TRINITY_DN7843_c0_g1_i1.p1	PF16113.7	Enoyl-CoA hydratase/isomerase
TRINITY_DN5302_c0_g2_i1.p2	PF12799.9	Leucine Rich repeats (2 copies)
TRINITY_DN23636_c0_g1_i4.p1	PF00314.19	Thaumatin family
TRINITY_DN304_c0_g1_i5.p2	PF07571.15	TAF6 C-terminal HEAT repeat domain
TRINITY_DN7285_c0_g1_i4.p1	PF08240.14	Alcohol dehydrogenase GroES-like domain
TRINITY_DN8462_c0_g1_i3.p1	PF07885.18	Ion channel
TRINITY_DN4625_c0_g1_i3.p1	PF13661.8	2OG-Fe(II) oxygenase superfamily
TRINITY_DN11463_c0_g1_i2.p1	PF00646.35	F-box domain
TRINITY_DN30221_c0_g1_i1.p1	PF04788.14	Protein of unknown function (DUF620)
TRINITY_DN4317_c0_g1_i2.p1	PF00183.20	Hsp90 protein
TRINITY_DN615_c0_g1_i7.p1	PF13561.8	Enoyl-(Acyl carrier protein) reductase
TRINITY_DN27438_c0_g1_i15.p1	PF18037.3	Ubiquitin-like domain
TRINITY_DN2620_c0_g3_i6.p1	PF00106.27	short chain dehydrogenase
TRINITY_DN3198_c0_g1_i1.p1	PF04359.16	Protein of unknown function (DUF493)
TRINITY_DN3256_c0_g1_i12.p1	PF03060.17	Nitronate monooxygenase
TRINITY_DN24195_c0_g1_i13.p1	PF02992.16	Transposase family tnp2
TRINITY_DN346_c1_g1_i1.p1	PF00080.22	Copper/zinc superoxide dismutase (SODC)
TRINITY_DN18246_c0_g1_i1.p1	PF13516.8	Leucine Rich repeat
TRINITY_DN1289_c0_g2_i6.p3	PF17214.5	KH domain
TRINITY_DN6710_c0_g1_i16.p3	PF13191.8	AAA ATPase domain
TRINITY_DN749_c0_g1_i6.p1	PF13625.8	Helicase conserved C-terminal domain
TRINITY_DN81656_c0_g1_i18.p1	PF12799.9	Leucine Rich repeats (2 copies)
TRINITY_DN1197_c0_g1_i2.p1	PF00180.22	Isocitrate/isopropylmalate dehydrogenase
TRINITY_DN33101_c0_g1_i12.p2	PF03124.16	EXS family
TRINITY_DN1679_c0_g1_i3.p2	PF07714.19	Protein tyrosine and serine/threonine kinase
TRINITY_DN4638_c0_g1_i9.p4	PF01823.21	MAC/Perforin domain
TRINITY_DN1025_c2_g1_i4.p1	PF13669.8	Glyoxalase/Bleomycin resistance protein/Dioxygenase superfamily
TRINITY_DN1851_c1_g1_i1.p1	PF00012.22	Hsp70 protein
TRINITY_DN9160_c0_g2_i1.p1	PF01443.20	Viral (Superfamily 1) RNA helicase
TRINITY_DN16086_c0_g1_i21.p1	PF04055.23	Radical SAM superfamily
TRINITY_DN346_c1_g3_i1.p2	PF00080.22	Copper/zinc superoxide dismutase (SODC)
TRINITY_DN13659_c0_g1_i13.p2	PF13625.8	Helicase conserved C-terminal domain
TRINITY_DN7285_c0_g1_i1.p1	PF08240.14	Alcohol dehydrogenase GroES-like domain
TRINITY_DN6778_c1_g1_i2.p1	PF01695.19	IstB-like ATP binding protein
TRINITY_DN17627_c0_g1_i3.p1	PF08031.14	Berberine and berberine like
TRINITY_DN2567_c0_g1_i18.p2	PF08282.14	haloacid dehalogenase-like hydrolase
TRINITY_DN4113_c1_g1_i2.p2	PF01554.20	MatE
TRINITY_DN55636_c0_g1_i6.p1	PF16864.7	Dimerisation domain
TRINITY_DN15023_c0_g1_i4.p1	PF01493.21	GXGXG motif
TRINITY_DN1851_c0_g2_i9.p1	PF00012.22	Hsp70 protein
TRINITY_DN1289_c0_g2_i1.p2	PF18345.3	Zinc finger domain
TRINITY_DN24195_c0_g1_i13.p1	PF03004.16	Plant transposase (Ptta/En/Spm family)
TRINITY_DN33809_c0_g2_i1.p1	PF00463.23	Isocitrate lyase family
TRINITY_DN4216_c1_g1_i6.p1	PF00011.23	Hsp20/alpha crystallin family
TRINITY_DN4856_c0_g1_i2.p1	PF00262.20	Calreticulin family
TRINITY_DN4863_c0_g2_i2.p1	PF00450.24	Serine carboxypeptidase
TRINITY_DN12352_c0_g3_i2.p1	PF00447.19	HSF-type DNA-binding
TRINITY_DN3256_c0_g1_i12.p3	PF15288.8	Zinc knuckle
TRINITY_DN9734_c0_g1_i2.p1	PF01536.18	Adenosylmethionine decarboxylase
TRINITY_DN3256_c0_g1_i13.p3	PF14244.8	gag-polypeptide of LTR copia-type
TRINITY_DN5226_c0_g1_i4.p1	PF13625.8	Helicase conserved C-terminal domain
TRINITY_DN194_c1_g3_i5.p1	PF18444.3	RNA recognition motif
TRINITY_DN215_c0_g1_i6.p1	PF00135.30	Carboxylesterase family
TRINITY_DN464_c1_g1_i8.p1	PF12212.10	PAZ domain
TRINITY_DN13389_c0_g1_i1.p1	PF00365.22	Phosphofructokinase
TRINITY_DN55636_c0_g1_i6.p1	PF00891.20	O-methyltransferase domain
TRINITY_DN2484_c0_g2_i1.p1	PF02987.18	Late embryogenesis abundant protein
TRINITY_DN13659_c0_g1_i13.p2	PF14622.8	Ribonuclease-III-like
TRINITY_DN406_c0_g1_i20.p1	PF16719.7	SAWADEE domain
TRINITY_DN51953_c0_g1_i1.p1	PF13839.8	GDSL/SGNH-like Acyl-Esterase family found in Pmr5 and Cas1p
TRINITY_DN12885_c0_g1_i1.p1	PF13921.8	Myb-like DNA-binding domain
TRINITY_DN7929_c0_g2_i1.p2	PF01657.19	Salt stress response/antifungal
TRINITY_DN7285_c0_g1_i5.p1	PF16912.7	Glucose dehydrogenase C-terminus
TRINITY_DN8055_c0_g1_i1.p1	PF13921.8	Myb-like DNA-binding domain
TRINITY_DN7348_c0_g1_i2.p1	PF08777.13	RNA binding motif
TRINITY_DN2641_c1_g1_i5.p1	PF07883.13	Cupin domain
TRINITY_DN17627_c0_g1_i4.p1	PF08031.14	Berberine and berberine like
TRINITY_DN1503_c1_g3_i2.p1	PF06723.15	MreB/Mbl protein
TRINITY_DN5463_c1_g1_i3.p1	PF00155.23	Aminotransferase class I and II
TRINITY_DN1370_c0_g1_i8.p1	PF01490.20	Transmembrane amino acid transporter protein
TRINITY_DN3193_c0_g1_i4.p1	PF13378.8	Enolase C-terminal domain-like
TRINITY_DN2714_c0_g1_i4.p1	PF12697.9	Alpha/beta hydrolase family
TRINITY_DN1888_c0_g3_i2.p1	PF00046.31	Homeodomain
TRINITY_DN14015_c0_g1_i1.p1	PF12590.10	Acyl-ATP thioesterase
TRINITY_DN8885_c0_g1_i3.p1	PF07714.19	Protein tyrosine and serine/threonine kinase
TRINITY_DN37384_c2_g1_i2.p1	PF13855.8	Leucine rich repeat
TRINITY_DN8261_c0_g1_i5.p1	PF07725.14	Leucine Rich Repeat
TRINITY_DN1093_c0_g1_i7.p1	PF00069.27	Protein kinase domain
TRINITY_DN47_c0_g2_i1.p1	PF00403.28	Heavy-metal-associated domain
TRINITY_DN8462_c0_g1_i1.p1	PF00520.33	Ion transport protein
TRINITY_DN4010_c0_g2_i1.p1	PF01486.19	K-box region
TRINITY_DN678_c0_g1_i1.p1	PF07714.19	Protein tyrosine and serine/threonine kinase
TRINITY_DN23_c0_g2_i3.p1	PF06723.15	MreB/Mbl protein
TRINITY_DN29653_c0_g2_i1.p1	PF01599.21	Ribosomal protein S27a
TRINITY_DN754_c0_g1_i11.p1	PF03000.16	NPH3 family
TRINITY_DN14015_c0_g1_i10.p1	PF12590.10	Acyl-ATP thioesterase
TRINITY_DN5600_c1_g3_i1.p1	PF00069.27	Protein kinase domain
TRINITY_DN23214_c0_g1_i1.p1	PF01202.24	Shikimate kinase
TRINITY_DN8466_c1_g1_i7.p1	PF00332.20	Glycosyl hydrolases family 17
TRINITY_DN2664_c0_g1_i5.p4	PF00069.27	Protein kinase domain
TRINITY_DN2904_c0_g1_i9.p1	PF07714.19	Protein tyrosine and serine/threonine kinase
TRINITY_DN13928_c0_g2_i2.p1	PF00155.23	Aminotransferase class I and II
TRINITY_DN4848_c0_g2_i1.p1	PF17177.6	Pentacotripeptide-repeat region of PRORP
TRINITY_DN10227_c0_g1_i9.p1	PF00614.24	Phospholipase D Active site motif
TRINITY_DN16086_c0_g1_i16.p1	PF00919.22	Uncharacterized protein family UPF0004
TRINITY_DN5026_c0_g1_i1.p1	PF12697.9	Alpha/beta hydrolase family
TRINITY_DN437_c0_g1_i2.p1	PF12860.9	PAS fold
TRINITY_DN4371_c1_g1_i5.p2	PF03398.16	Regulator of Vps4 activity in the MVB pathway
TRINITY_DN8885_c0_g1_i1.p1	PF00069.27	Protein kinase domain
TRINITY_DN2648_c0_g1_i2.p1	PF00012.22	Hsp70 protein
TRINITY_DN10262_c0_g1_i1.p1	PF12894.9	Anaphase-promoting complex subunit 4 WD40 domain
TRINITY_DN2513_c0_g2_i2.p1	PF07714.19	Protein tyrosine and serine/threonine kinase
TRINITY_DN23761_c0_g1_i1.p1	PF13516.8	Leucine Rich repeat
TRINITY_DN1851_c0_g2_i3.p1	PF06723.15	MreB/Mbl protein
TRINITY_DN10039_c0_g1_i4.p1	PF12894.9	Anaphase-promoting complex subunit 4 WD40 domain
TRINITY_DN626_c0_g1_i6.p3	PF06414.14	Zeta toxin
TRINITY_DN11463_c0_g1_i1.p1	PF12937.9	F-box-like
TRINITY_DN5970_c0_g1_i19.p1	PF00082.24	Subtilase family
TRINITY_DN6192_c0_g1_i9.p1	PF01156.21	Inosine-uridine preferring nucleoside hydrolase
TRINITY_DN5143_c0_g1_i3.p1	PF12775.9	P-loop containing dynein motor region
TRINITY_DN4137_c0_g1_i6.p2	PF00999.23	Sodium/hydrogen exchanger family
TRINITY_DN464_c1_g1_i1.p1	PF13625.8	Helicase conserved C-terminal domain
TRINITY_DN52563_c0_g1_i2.p1	PF00450.24	Serine carboxypeptidase
TRINITY_DN5278_c0_g1_i6.p1	PF19580.1	Endonuclease/Exonuclease/phosphatase family
TRINITY_DN18928_c0_g1_i8.p1	PF00067.24	Cytochrome P450
TRINITY_DN1162_c3_g1_i3.p1	PF00332.20	Glycosyl hydrolases family 17
TRINITY_DN5663_c0_g1_i3.p2	PF01565.25	FAD binding domain
TRINITY_DN5027_c2_g2_i1.p1	PF13243.8	Squalene-hopene cyclase C-terminal domain
TRINITY_DN9261_c0_g1_i3.p1	PF01694.24	Rhomboid family
TRINITY_DN13647_c0_g1_i3.p1	PF12852.9	Cupin
TRINITY_DN10359_c0_g1_i7.p1	PF12697.9	Alpha/beta hydrolase family
TRINITY_DN23_c0_g1_i5.p1	PF00012.22	Hsp70 protein
TRINITY_DN2759_c0_g1_i2.p2	PF07714.19	Protein tyrosine and serine/threonine kinase
TRINITY_DN26823_c0_g1_i6.p1	PF00450.24	Serine carboxypeptidase
TRINITY_DN6449_c0_g1_i11.p1	PF13555.8	P-loop containing region of AAA domain
TRINITY_DN3434_c0_g1_i3.p1	PF01599.21	Ribosomal protein S27a
TRINITY_DN6910_c0_g2_i9.p1	PF05142.14	Domain of unknown function (DUF702)
TRINITY_DN35933_c0_g1_i5.p1	PF00046.31	Homeodomain
TRINITY_DN4590_c0_g1_i16.p1	PF01595.22	Cyclin M transmembrane N-terminal domain
TRINITY_DN1325_c0_g1_i19.p2	PF00580.23	UvrD/REP helicase N-terminal domain
TRINITY_DN7278_c0_g1_i3.p1	PF07859.15	alpha/beta hydrolase fold
TRINITY_DN28171_c0_g1_i11.p2	PF01764.27	Lipase (class 3)
TRINITY_DN24326_c0_g1_i3.p1	PF06507.15	Auxin response factor
TRINITY_DN3256_c0_g1_i13.p1	PF01070.20	FMN-dependent dehydrogenase
TRINITY_DN3240_c0_g1_i9.p2	PF02365.17	No apical meristem (NAM) protein
TRINITY_DN29653_c0_g2_i1.p1	PF13881.8	Ubiquitin-2 like Rad60 SUMO-like
TRINITY_DN357_c0_g2_i1.p1	PF14667.8	Polysaccharide biosynthesis C-terminal domain
TRINITY_DN3256_c0_g1_i12.p3	PF14244.8	gag-polypeptide of LTR copia-type
TRINITY_DN316_c0_g1_i1.p1	PF00046.31	Homeodomain
TRINITY_DN6399_c0_g2_i5.p1	PF13561.8	Enoyl-(Acyl carrier protein) reductase
TRINITY_DN464_c1_g2_i1.p1	PF03368.16	Dicer dimerisation domain
TRINITY_DN1370_c0_g1_i4.p2	PF01490.20	Transmembrane amino acid transporter protein
TRINITY_DN401_c0_g1_i2.p1	PF00067.24	Cytochrome P450
TRINITY_DN13170_c0_g1_i1.p1	PF04674.14	Phosphate-induced protein 1 conserved region
TRINITY_DN2398_c0_g1_i13.p1	PF08771.13	FKBP12-rapamycin binding domain
TRINITY_DN8462_c0_g1_i2.p1	PF00027.31	Cyclic nucleotide-binding domain
TRINITY_DN1331_c1_g1_i3.p1	PF00201.20	UDP-glucoronosyl and UDP-glucosyl transferase
TRINITY_DN6710_c0_g1_i16.p3	PF19055.2	ABC-2 type transporter
TRINITY_DN1647_c0_g1_i6.p2	PF02365.17	No apical meristem (NAM) protein
TRINITY_DN749_c0_g1_i6.p1	PF04408.25	Helicase associated domain (HA2)
TRINITY_DN3198_c0_g1_i1.p1	PF13019.8	Silencing defective 2 N-terminal ubiquitin domain
TRINITY_DN22133_c0_g1_i3.p1	PF00022.21	Actin
TRINITY_DN8883_c0_g3_i3.p1	PF02889.18	Sec63 Brl domain
TRINITY_DN18673_c0_g1_i3.p2	PF14226.8	non-haem dioxygenase in morphine synthesis N-terminal
TRINITY_DN2516_c1_g1_i15.p1	PF13602.8	Zinc-binding dehydrogenase
TRINITY_DN3240_c0_g1_i2.p2	PF02365.17	No apical meristem (NAM) protein
TRINITY_DN29653_c0_g2_i1.p1	PF17963.3	Bacterial Ig domain
TRINITY_DN3471_c0_g1_i4.p1	PF12937.9	F-box-like
TRINITY_DN1758_c0_g3_i4.p5	PF00069.27	Protein kinase domain
TRINITY_DN2398_c0_g1_i13.p1	PF02985.24	HEAT repeat
TRINITY_DN10249_c0_g1_i1.p2	PF02458.17	Transferase family
TRINITY_DN15012_c1_g1_i1.p1	PF00684.21	DnaJ central domain
TRINITY_DN4566_c0_g1_i10.p1	PF03151.18	Triose-phosphate Transporter family
TRINITY_DN85334_c0_g1_i1.p1	PF01490.20	Transmembrane amino acid transporter protein
TRINITY_DN6192_c0_g1_i2.p1	PF01156.21	Inosine-uridine preferring nucleoside hydrolase
TRINITY_DN22221_c0_g1_i4.p1	PF00141.25	Peroxidase
TRINITY_DN64_c0_g1_i2.p1	PF03789.15	ELK domain
TRINITY_DN637_c0_g2_i3.p1	PF07847.14	PCO_ADO
TRINITY_DN1289_c0_g2_i7.p1	PF11960.10	Domain of unknown function (DUF3474)
TRINITY_DN12535_c0_g1_i3.p3	PF12854.9	PPR repeat
TRINITY_DN1722_c1_g1_i4.p1	PF18039.3	UBA-like domain
TRINITY_DN31927_c0_g2_i6.p1	PF00847.22	AP2 domain
TRINITY_DN280_c0_g2_i1.p1	PF01565.25	FAD binding domain
TRINITY_DN9458_c0_g1_i3.p1	PF00022.21	Actin
TRINITY_DN63657_c0_g1_i1.p1	PF07714.19	Protein tyrosine and serine/threonine kinase
TRINITY_DN1476_c0_g3_i1.p1	PF00012.22	Hsp70 protein
TRINITY_DN1982_c0_g1_i5.p1	PF07726.13	ATPase family associated with various cellular activities (AAA)
TRINITY_DN1370_c0_g1_i2.p1	PF01490.20	Transmembrane amino acid transporter protein
TRINITY_DN3975_c1_g1_i5.p2	PF18345.3	Zinc finger domain
TRINITY_DN27438_c0_g1_i15.p1	PF13019.8	Silencing defective 2 N-terminal ubiquitin domain
TRINITY_DN5027_c2_g2_i1.p1	PF13249.8	Squalene-hopene cyclase N-terminal domain
TRINITY_DN27438_c0_g1_i15.p1	PF12977.9	Domain of Unknown Function with PDB structure (DUF3861)
TRINITY_DN1452_c0_g1_i21.p1	PF13561.8	Enoyl-(Acyl carrier protein) reductase
TRINITY_DN2398_c0_g1_i13.p2	PF02259.25	FAT domain
TRINITY_DN464_c1_g1_i8.p1	PF00270.31	DEAD/DEAH box helicase
TRINITY_DN15023_c0_g1_i3.p1	PF01493.21	GXGXG motif
TRINITY_DN1370_c0_g1_i13.p1	PF01490.20	Transmembrane amino acid transporter protein
TRINITY_DN13647_c0_g1_i4.p1	PF07883.13	Cupin domain
TRINITY_DN51181_c0_g1_i4.p2	PF00079.22	Serpin (serine protease inhibitor)
TRINITY_DN175375_c0_g1_i1.p1	PF01566.20	Natural resistance-associated macrophage protein
TRINITY_DN13472_c0_g1_i6.p1	PF00069.27	Protein kinase domain
TRINITY_DN3434_c0_g1_i4.p1	PF18579.3	Rubisco accumulation factor 1 helix turn helix domain
TRINITY_DN5257_c0_g1_i2.p1	PF00266.21	Aminotransferase class-V
TRINITY_DN25146_c0_g1_i8.p1	PF05686.14	Glycosyl transferase family 90
TRINITY_DN1289_c0_g2_i1.p2	PF18044.3	CCCH-type zinc finger
TRINITY_DN3256_c0_g1_i7.p2	PF03060.17	Nitronate monooxygenase
TRINITY_DN6449_c0_g1_i11.p1	PF02463.21	RecF/RecN/SMC N terminal domain
TRINITY_DN626_c0_g1_i5.p2	PF06414.14	Zeta toxin
TRINITY_DN475_c0_g2_i1.p1	PF13561.8	Enoyl-(Acyl carrier protein) reductase
TRINITY_DN9160_c0_g2_i1.p1	PF07724.16	AAA domain (Cdc48 subfamily)
TRINITY_DN10137_c0_g2_i2.p1	PF04669.15	Polysaccharide biosynthesis
TRINITY_DN13975_c0_g1_i1.p1	PF07816.13	Protein of unknown function (DUF1645)
TRINITY_DN4638_c0_g1_i2.p4	PF01823.21	MAC/Perforin domain
TRINITY_DN792_c0_g2_i1.p1	PF00288.28	GHMP kinases N terminal domain
TRINITY_DN11630_c0_g1_i1.p1	PF13625.8	Helicase conserved C-terminal domain
TRINITY_DN5465_c0_g1_i2.p1	PF00764.21	Arginosuccinate synthase
TRINITY_DN5682_c0_g2_i1.p2	PF13921.8	Myb-like DNA-binding domain
TRINITY_DN37384_c2_g1_i2.p1	PF13676.8	TIR domain
TRINITY_DN1001_c0_g1_i9.p1	PF13440.8	Polysaccharide biosynthesis protein
TRINITY_DN35933_c0_g1_i4.p1	PF02183.20	Homeobox associated leucine zipper
TRINITY_DN6192_c0_g1_i4.p2	PF01156.21	Inosine-uridine preferring nucleoside hydrolase
TRINITY_DN8462_c0_g1_i1.p1	PF07885.18	Ion channel
TRINITY_DN4915_c0_g2_i10.p1	PF01545.23	Cation efflux family
TRINITY_DN3198_c0_g1_i2.p1	PF05031.14	Iron Transport-associated domain
TRINITY_DN739_c0_g1_i1.p1	PF00069.27	Protein kinase domain
TRINITY_DN8184_c0_g1_i3.p1	PF07883.13	Cupin domain
TRINITY_DN1756_c0_g1_i2.p1	PF07891.14	Protein of unknown function (DUF1666)
TRINITY_DN62114_c0_g1_i3.p1	PF00173.30	Cytochrome b5-like Heme/Steroid binding domain
TRINITY_DN5912_c0_g1_i1.p1	PF00046.31	Homeodomain
TRINITY_DN464_c1_g1_i3.p2	PF00035.28	Double-stranded RNA binding motif
TRINITY_DN4638_c0_g1_i16.p1	PF00978.23	RNA dependent RNA polymerase
TRINITY_DN22221_c0_g1_i2.p1	PF00141.25	Peroxidase
TRINITY_DN5970_c0_g1_i7.p2	PF02225.24	PA domain
TRINITY_DN15617_c1_g1_i3.p1	PF03789.15	ELK domain
TRINITY_DN5663_c0_g1_i7.p1	PF01946.19	Thi4 family
TRINITY_DN6567_c0_g1_i3.p1	PF13639.8	Ring finger domain
TRINITY_DN41549_c0_g1_i1.p1	PF00274.21	Fructose-bisphosphate aldolase class-I
TRINITY_DN14015_c0_g1_i1.p1	PF01643.19	Acyl-ACP thioesterase
TRINITY_DN15012_c1_g1_i1.p1	PF00226.33	DnaJ domain
TRINITY_DN4109_c0_g3_i2.p1	PF12937.9	F-box-like
TRINITY_DN4061_c0_g1_i3.p1	PF16190.7	Ubiquitin-activating enzyme E1 FCCH domain
TRINITY_DN28374_c0_g1_i1.p2	PF13561.8	Enoyl-(Acyl carrier protein) reductase
TRINITY_DN14015_c0_g1_i9.p2	PF12590.10	Acyl-ATP thioesterase
TRINITY_DN1325_c0_g1_i19.p2	PF01443.20	Viral (Superfamily 1) RNA helicase
TRINITY_DN401_c0_g1_i3.p1	PF00067.24	Cytochrome P450
TRINITY_DN6884_c0_g1_i8.p1	PF14595.8	Thioredoxin
TRINITY_DN9390_c0_g1_i7.p1	PF01599.21	Ribosomal protein S27a
TRINITY_DN9467_c0_g1_i3.p1	PF01070.20	FMN-dependent dehydrogenase
TRINITY_DN1289_c0_g2_i6.p3	PF18345.3	Zinc finger domain
TRINITY_DN12720_c1_g1_i1.p1	PF04783.14	Protein of unknown function (DUF630)
TRINITY_DN34158_c0_g1_i1.p1	PF14577.8	Sieve element occlusion C-terminus
TRINITY_DN316_c0_g1_i5.p1	PF03789.15	ELK domain
TRINITY_DN9582_c0_g2_i1.p1	PF07714.19	Protein tyrosine and serine/threonine kinase
TRINITY_DN8221_c0_g2_i1.p6	PF07727.16	Reverse transcriptase (RNA-dependent DNA polymerase)
TRINITY_DN8225_c0_g2_i4.p1	PF13855.8	Leucine rich repeat
TRINITY_DN1779_c1_g1_i5.p1	PF00300.24	Histidine phosphatase superfamily (branch 1)
TRINITY_DN5663_c0_g1_i13.p4	PF01946.19	Thi4 family
TRINITY_DN3999_c1_g1_i1.p1	PF06414.14	Zeta toxin
TRINITY_DN7057_c0_g1_i3.p1	PF09751.11	Nuclear protein Es2
TRINITY_DN74739_c0_g1_i1.p1	PF12796.9	Ankyrin repeats (3 copies)
TRINITY_DN437_c0_g1_i2.p1	PF13426.9	PAS domain
TRINITY_DN35933_c0_g1_i3.p1	PF00046.31	Homeodomain
TRINITY_DN2904_c0_g1_i4.p1	PF07714.19	Protein tyrosine and serine/threonine kinase
TRINITY_DN16086_c0_g1_i2.p1	PF04055.23	Radical SAM superfamily
TRINITY_DN5143_c0_g1_i3.p1	PF07726.13	ATPase family associated with various cellular activities (AAA)
TRINITY_DN4638_c0_g1_i3.p1	PF00978.23	RNA dependent RNA polymerase
TRINITY_DN6449_c0_g1_i2.p1	PF13748.8	ABC transporter transmembrane region
TRINITY_DN1308_c0_g1_i3.p1	PF12894.9	Anaphase-promoting complex subunit 4 WD40 domain
TRINITY_DN6678_c0_g3_i2.p1	PF00067.24	Cytochrome P450
TRINITY_DN16086_c0_g1_i11.p1	PF00919.22	Uncharacterized protein family UPF0004
TRINITY_DN11463_c0_g1_i6.p1	PF12937.9	F-box-like
TRINITY_DN1888_c0_g3_i4.p1	PF02183.20	Homeobox associated leucine zipper
TRINITY_DN12249_c0_g1_i1.p1	PF00072.26	Response regulator receiver domain
TRINITY_DN2665_c0_g1_i6.p1	PF07714.19	Protein tyrosine and serine/threonine kinase
TRINITY_DN10227_c0_g1_i12.p2	PF00168.32	C2 domain
TRINITY_DN18907_c0_g1_i1.p1	PF07732.17	Multicopper oxidase
TRINITY_DN10456_c0_g1_i1.p1	PF04043.17	Plant invertase/pectin methylesterase inhibitor
TRINITY_DN1276_c0_g1_i2.p1	PF04981.15	NMD3 family
TRINITY_DN17627_c0_g1_i2.p1	PF01565.25	FAD binding domain
TRINITY_DN765_c1_g1_i1.p1	PF07690.18	Major Facilitator Superfamily
TRINITY_DN1888_c0_g3_i1.p2	PF00046.31	Homeodomain
TRINITY_DN2582_c0_g1_i1.p1	PF00155.23	Aminotransferase class I and II
TRINITY_DN27438_c0_g1_i15.p1	PF06149.14	Protein of unknown function (DUF969)
TRINITY_DN1289_c0_g2_i1.p1	PF03405.16	Fatty acid desaturase
TRINITY_DN6399_c0_g2_i10.p1	PF08659.12	KR domain
TRINITY_DN6080_c0_g1_i17.p2	PF11331.10	Probable zinc-ribbon domain
TRINITY_DN194_c1_g3_i5.p1	PF08777.13	RNA binding motif
TRINITY_DN8602_c0_g1_i14.p1	PF00155.23	Aminotransferase class I and II
TRINITY_DN2663_c1_g1_i4.p1	PF13921.8	Myb-like DNA-binding domain
TRINITY_DN19385_c1_g1_i3.p1	PF03789.15	ELK domain
TRINITY_DN1888_c0_g3_i4.p2	PF00046.31	Homeodomain
TRINITY_DN464_c1_g1_i2.p1	PF13625.8	Helicase conserved C-terminal domain
TRINITY_DN316_c0_g1_i5.p1	PF03790.15	KNOX1 domain
TRINITY_DN16086_c0_g1_i11.p1	PF04055.23	Radical SAM superfamily
TRINITY_DN749_c0_g1_i8.p1	PF07717.18	Oligonucleotide/oligosaccharide-binding (OB)-fold
TRINITY_DN5663_c0_g1_i5.p2	PF12831.9	FAD dependent oxidoreductase
TRINITY_DN62952_c0_g1_i3.p1	PF02142.24	MGS-like domain
TRINITY_DN1544_c0_g2_i7.p1	PF12697.9	Alpha/beta hydrolase family
TRINITY_DN1503_c1_g2_i4.p1	PF06723.15	MreB/Mbl protein
TRINITY_DN7028_c0_g2_i3.p1	PF14416.8	PMR5 N terminal Domain
TRINITY_DN8885_c0_g1_i13.p1	PF03109.18	ABC1 atypical kinase-like domain
TRINITY_DN15083_c0_g1_i8.p1	PF05142.14	Domain of unknown function (DUF702)
TRINITY_DN4590_c0_g1_i15.p1	PF01595.22	Cyclin M transmembrane N-terminal domain
TRINITY_DN55636_c0_g1_i5.p1	PF16864.7	Dimerisation domain
TRINITY_DN16351_c0_g1_i2.p1	PF01636.25	Phosphotransferase enzyme family
TRINITY_DN10803_c0_g1_i1.p1	PF07651.18	ANTH domain
TRINITY_DN2396_c0_g1_i1.p1	PF03479.17	Plants and Prokaryotes Conserved (PCC) domain
TRINITY_DN316_c0_g1_i3.p1	PF03791.15	KNOX2 domain
TRINITY_DN3434_c0_g1_i4.p1	PF06427.13	UDP-glucose:Glycoprotein Glucosyltransferase
TRINITY_DN10181_c0_g2_i1.p1	PF01238.23	Phosphomannose isomerase type I
TRINITY_DN4123_c0_g1_i4.p1	PF14815.8	NUDIX domain
TRINITY_DN1851_c0_g2_i7.p1	PF00012.22	Hsp70 protein
TRINITY_DN9390_c0_g1_i7.p1	PF00240.25	Ubiquitin family
TRINITY_DN34078_c0_g1_i6.p1	PF02466.21	Tim17/Tim22/Tim23/Pmp24 family
TRINITY_DN5302_c0_g2_i1.p2	PF07714.19	Protein tyrosine and serine/threonine kinase
TRINITY_DN6915_c0_g1_i6.p2	PF16544.7	Homodimerisation region of STAR domain protein
TRINITY_DN9001_c0_g1_i8.p1	PF10248.11	Myelodysplasia-myeloid leukemia factor 1-interacting protein
TRINITY_DN316_c0_g1_i5.p1	PF03791.15	KNOX2 domain
TRINITY_DN64_c0_g1_i2.p1	PF00046.31	Homeodomain
TRINITY_DN13170_c0_g1_i2.p1	PF04674.14	Phosphate-induced protein 1 conserved region
TRINITY_DN316_c0_g1_i5.p1	PF00046.31	Homeodomain
TRINITY_DN20685_c0_g1_i2.p1	PF13855.8	Leucine rich repeat
TRINITY_DN626_c0_g2_i5.p1	PF10533.11	Plant zinc cluster domain
TRINITY_DN8885_c0_g1_i17.p1	PF00069.27	Protein kinase domain
TRINITY_DN2479_c0_g1_i1.p1	PF14009.8	PADRE domain
TRINITY_DN35312_c1_g1_i3.p2	PF13661.8	2OG-Fe(II) oxygenase superfamily
TRINITY_DN4590_c0_g1_i5.p1	PF00571.30	CBS domain
TRINITY_DN3772_c0_g1_i4.p1	PF00106.27	short chain dehydrogenase
TRINITY_DN14072_c0_g1_i7.p2	PF13661.8	2OG-Fe(II) oxygenase superfamily
TRINITY_DN40656_c1_g1_i1.p1	PF04525.14	LURP-one-related
TRINITY_DN6399_c0_g2_i5.p1	PF00106.27	short chain dehydrogenase
TRINITY_DN5026_c0_g1_i2.p1	PF07859.15	alpha/beta hydrolase fold
TRINITY_DN4317_c0_g1_i6.p1	PF00183.20	Hsp90 protein
TRINITY_DN20685_c0_g1_i4.p2	PF07725.14	Leucine Rich Repeat
TRINITY_DN739_c0_g1_i3.p1	PF07714.19	Protein tyrosine and serine/threonine kinase
TRINITY_DN12535_c0_g1_i3.p3	PF13812.8	Pentatricopeptide repeat domain
TRINITY_DN9921_c0_g1_i2.p2	PF13812.8	Pentatricopeptide repeat domain
TRINITY_DN14149_c0_g2_i1.p1	PF02450.17	Lecithin:cholesterol acyltransferase
TRINITY_DN1289_c0_g2_i6.p1	PF11960.10	Domain of unknown function (DUF3474)
TRINITY_DN3524_c0_g1_i2.p2	PF03106.17	WRKY DNA -binding domain
TRINITY_DN12249_c0_g1_i1.p1	PF03924.15	CHASE domain
TRINITY_DN6099_c0_g1_i3.p1	PF00254.30	FKBP-type peptidyl-prolyl cis-trans isomerase
TRINITY_DN4061_c0_g1_i3.p1	PF10585.11	Ubiquitin-activating enzyme active site
TRINITY_DN1370_c0_g1_i11.p1	PF01490.20	Transmembrane amino acid transporter protein
TRINITY_DN3198_c0_g1_i2.p1	PF06234.14	Toluene-4-monooxygenase system protein B (TmoB)
TRINITY_DN1227_c0_g2_i1.p1	PF08063.14	PADR1 (NUC008) domain
TRINITY_DN316_c0_g1_i2.p1	PF05920.13	Homeobox KN domain
TRINITY_DN3170_c0_g1_i3.p1	PF13921.8	Myb-like DNA-binding domain
TRINITY_DN3975_c1_g1_i5.p2	PF00642.26	Zinc finger C-x8-C-x5-C-x3-H type (and similar)
TRINITY_DN227_c0_g1_i3.p2	PF07714.19	Protein tyrosine and serine/threonine kinase
TRINITY_DN20685_c0_g1_i4.p2	PF12799.9	Leucine Rich repeats (2 copies)
TRINITY_DN11674_c0_g1_i2.p1	PF00183.20	Hsp90 protein
TRINITY_DN23761_c0_g1_i1.p1	PF12799.9	Leucine Rich repeats (2 copies)
TRINITY_DN2386_c1_g1_i11.p1	PF00571.30	CBS domain
TRINITY_DN3651_c0_g1_i2.p1	PF00335.22	Tetraspanin family
TRINITY_DN4590_c0_g1_i13.p1	PF01595.22	Cyclin M transmembrane N-terminal domain
TRINITY_DN14781_c0_g2_i1.p1	PF07714.19	Protein tyrosine and serine/threonine kinase
TRINITY_DN11674_c0_g1_i3.p1	PF00183.20	Hsp90 protein
TRINITY_DN9160_c0_g2_i1.p1	PF13191.8	AAA ATPase domain
TRINITY_DN33101_c0_g1_i11.p1	PF03124.16	EXS family
TRINITY_DN23761_c0_g1_i1.p1	PF13855.8	Leucine rich repeat
TRINITY_DN14336_c0_g1_i3.p1	PF02365.17	No apical meristem (NAM) protein
TRINITY_DN7285_c0_g1_i1.p1	PF13602.8	Zinc-binding dehydrogenase
TRINITY_DN316_c0_g1_i4.p1	PF05920.13	Homeobox KN domain
TRINITY_DN7140_c0_g2_i1.p1	PF00860.22	Permease family
TRINITY_DN3198_c0_g1_i2.p1	PF13840.8	ACT domain
TRINITY_DN1452_c0_g1_i21.p1	PF00106.27	short chain dehydrogenase
TRINITY_DN2664_c0_g1_i5.p4	PF07714.19	Protein tyrosine and serine/threonine kinase
TRINITY_DN15617_c1_g1_i3.p1	PF03791.15	KNOX2 domain
TRINITY_DN3198_c0_g1_i1.p1	PF11069.10	Cilia- and flagella-associated protein 298
TRINITY_DN13659_c0_g1_i10.p1	PF00270.31	DEAD/DEAH box helicase
TRINITY_DN9390_c0_g1_i7.p1	PF18037.3	Ubiquitin-like domain
TRINITY_DN51554_c0_g1_i1.p1	PF07714.19	Protein tyrosine and serine/threonine kinase
TRINITY_DN8885_c0_g1_i10.p1	PF00069.27	Protein kinase domain
TRINITY_DN7749_c0_g2_i1.p1	PF00759.21	Glycosyl hydrolase family 9
TRINITY_DN1264_c0_g1_i4.p1	PF04859.14	Plant protein of unknown function (DUF641)
TRINITY_DN2441_c0_g1_i2.p1	PF00011.23	Hsp20/alpha crystallin family
TRINITY_DN5302_c0_g2_i10.p2	PF07725.14	Leucine Rich Repeat
TRINITY_DN207_c2_g1_i1.p1	PF14570.8	RING/Ubox like zinc-binding domain
TRINITY_DN3434_c0_g1_i4.p1	PF10302.11	DUF2407 ubiquitin-like domain
TRINITY_DN15023_c0_g1_i3.p1	PF12831.9	FAD dependent oxidoreductase
TRINITY_DN6449_c0_g1_i2.p1	PF13555.8	P-loop containing region of AAA domain
TRINITY_DN4010_c0_g2_i1.p1	PF00319.20	SRF-type transcription factor (DNA-binding and dimerisation domain)
TRINITY_DN2904_c0_g1_i9.p1	PF07725.14	Leucine Rich Repeat
TRINITY_DN4638_c0_g1_i16.p2	PF01823.21	MAC/Perforin domain
TRINITY_DN62114_c0_g1_i3.p1	PF03404.18	Mo-co oxidoreductase dimerisation domain
TRINITY_DN33101_c0_g1_i9.p2	PF03105.21	SPX domain
TRINITY_DN3198_c0_g1_i1.p1	PF02821.18	Staphylokinase/Streptokinase family
TRINITY_DN5293_c0_g1_i8.p1	PF06454.13	Protein of unknown function (DUF1084)
TRINITY_DN3772_c0_g1_i3.p1	PF13561.8	Enoyl-(Acyl carrier protein) reductase
TRINITY_DN14750_c1_g1_i1.p1	PF12799.9	Leucine Rich repeats (2 copies)
TRINITY_DN3198_c0_g1_i1.p1	PF13881.8	Ubiquitin-2 like Rad60 SUMO-like
TRINITY_DN4043_c0_g1_i8.p1	PF13672.8	Protein phosphatase 2C
TRINITY_DN906_c0_g1_i4.p1	PF03108.17	MuDR family transposase
TRINITY_DN33741_c0_g1_i1.p1	PF03083.18	Sugar efflux transporter for intercellular exchange
TRINITY_DN17749_c0_g1_i2.p1	PF13639.8	Ring finger domain
TRINITY_DN1139_c3_g1_i1.p1	PF07725.14	Leucine Rich Repeat
TRINITY_DN1452_c0_g1_i18.p1	PF13561.8	Enoyl-(Acyl carrier protein) reductase
TRINITY_DN23_c0_g2_i4.p1	PF00012.22	Hsp70 protein
TRINITY_DN6884_c0_g1_i2.p1	PF18253.3	Hsp70-interacting protein N N-terminal domain
TRINITY_DN6053_c0_g1_i2.p2	PF12796.9	Ankyrin repeats (3 copies)
TRINITY_DN6778_c1_g1_i2.p1	PF07726.13	ATPase family associated with various cellular activities (AAA)
TRINITY_DN4915_c0_g2_i10.p1	PF16916.7	Dimerisation domain of Zinc Transporter
TRINITY_DN28374_c0_g1_i2.p1	PF08659.12	KR domain
TRINITY_DN31927_c0_g2_i4.p1	PF00847.22	AP2 domain
TRINITY_DN6710_c0_g1_i14.p4	PF06182.13	ABC-2 family transporter protein
TRINITY_DN6778_c1_g1_i2.p1	PF05496.14	Holliday junction DNA helicase RuvB P-loop domain
TRINITY_DN9860_c1_g2_i1.p2	PF00343.22	Carbohydrate phosphorylase
TRINITY_DN437_c0_g1_i1.p1	PF13492.8	GAF domain
TRINITY_DN3058_c0_g1_i1.p1	PF14368.8	Probable lipid transfer
TRINITY_DN8848_c0_g1_i4.p1	PF13661.8	2OG-Fe(II) oxygenase superfamily
TRINITY_DN4638_c0_g1_i13.p1	PF00978.23	RNA dependent RNA polymerase
TRINITY_DN25694_c0_g1_i6.p1	PF00083.26	Sugar (and other) transporter
TRINITY_DN33872_c0_g1_i3.p1	PF00141.25	Peroxidase
TRINITY_DN1888_c0_g3_i6.p1	PF00046.31	Homeodomain
TRINITY_DN4638_c0_g1_i3.p2	PF01823.21	MAC/Perforin domain
TRINITY_DN6710_c0_g1_i14.p4	PF07726.13	ATPase family associated with various cellular activities (AAA)
TRINITY_DN3274_c0_g2_i1.p1	PF00230.22	Major intrinsic protein
TRINITY_DN33101_c0_g1_i1.p1	PF03124.16	EXS family
TRINITY_DN58961_c0_g1_i1.p1	PF13855.8	Leucine rich repeat
TRINITY_DN5970_c0_g1_i19.p1	PF05922.18	Peptidase inhibitor I9
TRINITY_DN6710_c0_g1_i14.p4	PF13671.8	AAA domain
TRINITY_DN3702_c0_g1_i11.p1	PF00071.24	Ras family
TRINITY_DN31880_c0_g1_i5.p1	PF18428.3	BRCA1 C Terminus (BRCT) domain
TRINITY_DN19385_c1_g1_i3.p1	PF00046.31	Homeodomain
TRINITY_DN810_c1_g1_i3.p1	PF00179.28	Ubiquitin-conjugating enzyme
TRINITY_DN9961_c0_g1_i7.p1	PF00067.24	Cytochrome P450
TRINITY_DN2441_c0_g1_i1.p1	PF17886.3	HSP20-like domain found in ArsA
TRINITY_DN6485_c0_g1_i4.p1	PF19304.1	D-3-phosphoglycerate dehydrogenase intervening domain
TRINITY_DN1289_c0_g2_i1.p1	PF11960.10	Domain of unknown function (DUF3474)
TRINITY_DN11452_c2_g1_i5.p1	PF03791.15	KNOX2 domain
TRINITY_DN2516_c1_g1_i13.p1	PF08240.14	Alcohol dehydrogenase GroES-like domain
TRINITY_DN64_c0_g1_i1.p1	PF03789.15	ELK domain
TRINITY_DN1289_c0_g2_i10.p3	PF00642.26	Zinc finger C-x8-C-x5-C-x3-H type (and similar)
TRINITY_DN626_c0_g1_i3.p2	PF06414.14	Zeta toxin
TRINITY_DN765_c1_g1_i6.p2	PF06813.15	Nodulin-like
TRINITY_DN5663_c0_g1_i13.p4	PF13450.8	NAD(P)-binding Rossmann-like domain
TRINITY_DN14015_c0_g1_i4.p1	PF12590.10	Acyl-ATP thioesterase
TRINITY_DN9480_c0_g1_i6.p1	PF05221.19	S-adenosyl-L-homocysteine hydrolase
TRINITY_DN7285_c0_g1_i11.p1	PF16912.7	Glucose dehydrogenase C-terminus
TRINITY_DN4043_c0_g1_i4.p1	PF13672.8	Protein phosphatase 2C
TRINITY_DN5292_c0_g1_i2.p1	PF00010.28	Helix-loop-helix DNA-binding domain
TRINITY_DN7285_c0_g1_i14.p1	PF08240.14	Alcohol dehydrogenase GroES-like domain
TRINITY_DN31880_c0_g1_i5.p1	PF08063.14	PADR1 (NUC008) domain
TRINITY_DN1151_c0_g1_i4.p1	PF07714.19	Protein tyrosine and serine/threonine kinase
TRINITY_DN5912_c0_g1_i1.p1	PF07526.13	Associated with HOX
TRINITY_DN4327_c0_g1_i1.p1	PF00118.26	TCP-1/cpn60 chaperonin family
TRINITY_DN4590_c0_g1_i2.p1	PF00571.30	CBS domain
TRINITY_DN10608_c0_g1_i1.p1	PF02519.16	Auxin responsive protein
TRINITY_DN26856_c0_g1_i2.p1	PF02987.18	Late embryogenesis abundant protein
TRINITY_DN7856_c0_g2_i2.p1	PF06955.14	Xyloglucan endo-transglycosylase (XET) C-terminus
TRINITY_DN1441_c0_g1_i8.p1	PF00847.22	AP2 domain
TRINITY_DN6456_c2_g1_i1.p1	PF03479.17	Plants and Prokaryotes Conserved (PCC) domain
TRINITY_DN1196_c0_g1_i1.p1	PF13692.8	Glycosyl transferases group 1
TRINITY_DN215_c1_g1_i4.p1	PF07859.15	alpha/beta hydrolase fold
TRINITY_DN7824_c1_g1_i5.p1	PF03106.17	WRKY DNA -binding domain
TRINITY_DN1227_c0_g2_i1.p1	PF05406.17	WGR domain
TRINITY_DN464_c1_g1_i8.p1	PF00035.28	Double-stranded RNA binding motif
TRINITY_DN396_c0_g1_i8.p2	PF02309.18	AUX/IAA family
TRINITY_DN3256_c0_g1_i13.p1	PF03060.17	Nitronate monooxygenase
TRINITY_DN7488_c0_g1_i10.p1	PF12799.9	Leucine Rich repeats (2 copies)
TRINITY_DN4453_c0_g1_i3.p1	PF04212.20	MIT (microtubule interacting and transport) domain
TRINITY_DN33078_c0_g1_i4.p1	PF13963.8	Transposase-associated domain
TRINITY_DN791_c0_g1_i15.p2	PF18345.3	Zinc finger domain
TRINITY_DN1441_c0_g1_i27.p1	PF00847.22	AP2 domain
TRINITY_DN64_c0_g1_i2.p1	PF03791.15	KNOX2 domain
TRINITY_DN999_c5_g1_i2.p1	PF04852.14	Protein of unknown function (DUF640)
TRINITY_DN1425_c0_g1_i5.p1	PF13921.8	Myb-like DNA-binding domain
TRINITY_DN8462_c0_g1_i4.p1	PF07885.18	Ion channel
TRINITY_DN4638_c0_g1_i4.p1	PF00978.23	RNA dependent RNA polymerase
TRINITY_DN7488_c0_g1_i2.p1	PF08263.14	Leucine rich repeat N-terminal domain
TRINITY_DN10227_c0_g1_i16.p1	PF13918.8	PLD-like domain
TRINITY_DN9160_c0_g2_i1.p1	PF00910.24	RNA helicase
TRINITY_DN2714_c0_g1_i1.p1	PF07859.15	alpha/beta hydrolase fold
TRINITY_DN7401_c1_g1_i2.p1	PF00153.29	Mitochondrial carrier protein
TRINITY_DN25552_c0_g1_i2.p1	PF12848.9	ABC transporter
TRINITY_DN2895_c0_g1_i9.p1	PF07714.19	Protein tyrosine and serine/threonine kinase
TRINITY_DN64_c0_g1_i3.p1	PF03791.15	KNOX2 domain
TRINITY_DN6710_c0_g1_i16.p3	PF14510.8	ABC-transporter N-terminal
TRINITY_DN26790_c0_g1_i1.p1	PF04640.16	PLATZ transcription factor
TRINITY_DN19999_c0_g1_i4.p1	PF00191.22	Annexin
TRINITY_DN991_c0_g1_i9.p1	PF00153.29	Mitochondrial carrier protein
TRINITY_DN464_c3_g2_i9.p1	PF14622.8	Ribonuclease-III-like
TRINITY_DN5663_c0_g1_i6.p1	PF12831.9	FAD dependent oxidoreductase
TRINITY_DN626_c0_g1_i7.p2	PF13671.8	AAA domain
TRINITY_DN6449_c0_g1_i14.p2	PF12848.9	ABC transporter
TRINITY_DN4848_c0_g2_i1.p1	PF13041.8	PPR repeat family
TRINITY_DN3606_c0_g2_i1.p1	PF02458.17	Transferase family
TRINITY_DN739_c0_g1_i2.p1	PF00069.27	Protein kinase domain
TRINITY_DN2904_c0_g1_i2.p1	PF12799.9	Leucine Rich repeats (2 copies)
TRINITY_DN5204_c0_g1_i2.p1	PF12799.9	Leucine Rich repeats (2 copies)
TRINITY_DN4638_c0_g1_i1.p2	PF01823.21	MAC/Perforin domain
TRINITY_DN396_c0_g1_i13.p1	PF00847.22	AP2 domain
TRINITY_DN5970_c0_g1_i31.p3	PF02225.24	PA domain
TRINITY_DN5663_c0_g1_i4.p1	PF12831.9	FAD dependent oxidoreductase
TRINITY_DN628_c0_g1_i5.p1	PF00514.25	Armadillo/beta-catenin-like repeat
TRINITY_DN27438_c0_g1_i15.p1	PF06427.13	UDP-glucose:Glycoprotein Glucosyltransferase
TRINITY_DN5293_c0_g1_i6.p1	PF06454.13	Protein of unknown function (DUF1084)
TRINITY_DN55636_c0_g1_i5.p1	PF00891.20	O-methyltransferase domain
TRINITY_DN16060_c0_g2_i1.p1	PF04937.17	Protein of unknown function (DUF 659)
TRINITY_DN63657_c0_g1_i1.p1	PF13855.8	Leucine rich repeat
TRINITY_DN464_c1_g1_i1.p2	PF13625.8	Helicase conserved C-terminal domain
TRINITY_DN58961_c0_g1_i1.p1	PF07725.14	Leucine Rich Repeat
TRINITY_DN6393_c0_g1_i6.p1	PF06955.14	Xyloglucan endo-transglycosylase (XET) C-terminus
TRINITY_DN31508_c0_g1_i5.p1	PF03283.15	Pectinacetylesterase
TRINITY_DN739_c0_g1_i2.p1	PF14531.8	Kinase-like
TRINITY_DN6099_c0_g1_i11.p1	PF13371.8	Tetratricopeptide repeat
TRINITY_DN38212_c0_g1_i6.p1	PF16579.7	Adenylate sensor of SNF1-like protein kinase
TRINITY_DN25146_c0_g1_i9.p1	PF05686.14	Glycosyl transferase family 90
TRINITY_DN2904_c0_g1_i3.p1	PF13516.8	Leucine Rich repeat
TRINITY_DN3907_c0_g1_i6.p1	PF00407.21	Pathogenesis-related protein Bet v 1 family
TRINITY_DN11452_c2_g1_i5.p1	PF03789.15	ELK domain
TRINITY_DN6525_c0_g1_i11.p1	PF07714.19	Protein tyrosine and serine/threonine kinase
TRINITY_DN1325_c0_g1_i19.p2	PF13191.8	AAA ATPase domain
TRINITY_DN3198_c0_g1_i2.p1	PF01020.19	Ribosomal L40e family
TRINITY_DN7413_c0_g1_i3.p1	PF01239.24	Protein prenyltransferase alpha subunit repeat
TRINITY_DN6710_c0_g1_i14.p4	PF13191.8	AAA ATPase domain
TRINITY_DN10359_c0_g1_i7.p1	PF00326.23	Prolyl oligopeptidase family
TRINITY_DN5912_c0_g1_i6.p2	PF05920.13	Homeobox KN domain
TRINITY_DN19742_c0_g2_i1.p1	PF00407.21	Pathogenesis-related protein Bet v 1 family
TRINITY_DN46467_c0_g1_i2.p1	PF00646.35	F-box domain
TRINITY_DN52563_c0_g1_i5.p1	PF00450.24	Serine carboxypeptidase
TRINITY_DN4566_c0_g1_i3.p2	PF00892.22	EamA-like transporter family
TRINITY_DN1713_c0_g1_i8.p2	PF14389.8	Leucine-zipper of ternary complex factor MIP1
TRINITY_DN55129_c0_g1_i2.p1	PF01565.25	FAD binding domain
TRINITY_DN9390_c0_g1_i7.p1	PF13881.8	Ubiquitin-2 like Rad60 SUMO-like
TRINITY_DN6393_c0_g1_i7.p1	PF06955.14	Xyloglucan endo-transglycosylase (XET) C-terminus
TRINITY_DN2904_c0_g1_i3.p1	PF07725.14	Leucine Rich Repeat
TRINITY_DN5334_c0_g2_i19.p1	PF00069.27	Protein kinase domain
TRINITY_DN12249_c0_g1_i3.p1	PF03924.15	CHASE domain
TRINITY_DN739_c0_g1_i5.p1	PF07714.19	Protein tyrosine and serine/threonine kinase
TRINITY_DN4123_c0_g1_i5.p1	PF14815.8	NUDIX domain
TRINITY_DN2966_c0_g1_i3.p1	PF04601.15	Domain of unknown function (DUF569)
TRINITY_DN6020_c0_g3_i1.p2	PF02330.18	Mitochondrial glycoprotein
TRINITY_DN12249_c0_g1_i1.p1	PF00512.27	His Kinase A (phospho-acceptor) domain
TRINITY_DN2567_c0_g1_i2.p1	PF08282.14	haloacid dehalogenase-like hydrolase
TRINITY_DN6399_c0_g2_i10.p1	PF00106.27	short chain dehydrogenase
TRINITY_DN8261_c0_g1_i5.p1	PF12799.9	Leucine Rich repeats (2 copies)
TRINITY_DN18246_c0_g1_i2.p1	PF12799.9	Leucine Rich repeats (2 copies)
TRINITY_DN2657_c0_g1_i5.p1	PF00248.23	Aldo/keto reductase family
TRINITY_DN5078_c0_g2_i3.p1	PF00790.21	VHS domain
TRINITY_DN6319_c0_g2_i1.p1	PF00847.22	AP2 domain
TRINITY_DN46760_c0_g1_i6.p5	PF12697.9	Alpha/beta hydrolase family
TRINITY_DN4123_c0_g1_i1.p1	PF18290.3	Nudix hydrolase domain
TRINITY_DN5849_c0_g1_i4.p1	PF03110.16	SBP domain
TRINITY_DN14015_c0_g1_i9.p2	PF01643.19	Acyl-ACP thioesterase
TRINITY_DN14750_c1_g1_i1.p1	PF08263.14	Leucine rich repeat N-terminal domain
TRINITY_DN10227_c0_g1_i12.p2	PF00614.24	Phospholipase D Active site motif
TRINITY_DN6567_c0_g1_i1.p1	PF12678.9	RING-H2 zinc finger domain
TRINITY_DN2657_c0_g1_i4.p1	PF00248.23	Aldo/keto reductase family
TRINITY_DN15617_c1_g1_i3.p1	PF03790.15	KNOX1 domain
TRINITY_DN14015_c0_g1_i5.p1	PF01643.19	Acyl-ACP thioesterase
TRINITY_DN8055_c0_g1_i2.p1	PF13921.8	Myb-like DNA-binding domain
TRINITY_DN1227_c0_g2_i1.p1	PF00645.20	Poly(ADP-ribose) polymerase and DNA-Ligase Zn-finger region
TRINITY_DN54406_c0_g1_i4.p1	PF04852.14	Protein of unknown function (DUF640)
TRINITY_DN38355_c0_g1_i7.p1	PF00082.24	Subtilase family
TRINITY_DN5663_c0_g1_i13.p4	PF01565.25	FAD binding domain
TRINITY_DN2714_c0_g1_i2.p1	PF07859.15	alpha/beta hydrolase fold
TRINITY_DN23989_c1_g1_i1.p1	PF14569.8	Zinc-binding RING-finger
TRINITY_DN1476_c0_g4_i1.p1	PF06723.15	MreB/Mbl protein
TRINITY_DN3434_c0_g1_i3.p1	PF11069.10	Cilia- and flagella-associated protein 298
TRINITY_DN12720_c1_g1_i3.p1	PF04782.14	Protein of unknown function (DUF632)
TRINITY_DN17158_c0_g1_i1.p1	PF06217.14	GAGA binding protein-like family
TRINITY_DN3434_c0_g1_i4.p1	PF13840.8	ACT domain
TRINITY_DN33101_c0_g1_i17.p1	PF03124.16	EXS family
TRINITY_DN51554_c0_g1_i1.p1	PF12799.9	Leucine Rich repeats (2 copies)
TRINITY_DN820_c0_g1_i8.p1	PF02301.20	HORMA domain
TRINITY_DN7502_c1_g1_i4.p1	PF07725.14	Leucine Rich Repeat
TRINITY_DN33101_c0_g1_i17.p1	PF03105.21	SPX domain
TRINITY_DN5970_c0_g1_i7.p2	PF00082.24	Subtilase family
TRINITY_DN17143_c0_g3_i10.p1	PF00270.31	DEAD/DEAH box helicase
TRINITY_DN33872_c0_g1_i4.p1	PF00141.25	Peroxidase
TRINITY_DN14087_c0_g1_i3.p1	PF06694.13	Plant nuclear matrix protein 1 (NMP1)
TRINITY_DN33436_c1_g1_i1.p1	PF00069.27	Protein kinase domain
TRINITY_DN6884_c0_g1_i13.p1	PF14595.8	Thioredoxin
TRINITY_DN4482_c0_g1_i8.p1	PF00582.28	Universal stress protein family
TRINITY_DN6710_c0_g1_i14.p4	PF14510.8	ABC-transporter N-terminal
TRINITY_DN51299_c1_g1_i1.p1	PF13202.8	EF hand
TRINITY_DN8834_c0_g1_i11.p2	PF01073.21	3-beta hydroxysteroid dehydrogenase/isomerase family
TRINITY_DN5663_c0_g1_i3.p2	PF13738.8	Pyridine nucleotide-disulphide oxidoreductase
TRINITY_DN1544_c0_g2_i7.p1	PF07859.15	alpha/beta hydrolase fold
TRINITY_DN754_c0_g1_i2.p1	PF03000.16	NPH3 family
TRINITY_DN24824_c0_g1_i1.p1	PF07732.17	Multicopper oxidase
TRINITY_DN3772_c0_g1_i3.p2	PF00106.27	short chain dehydrogenase
TRINITY_DN5204_c0_g1_i1.p1	PF07714.19	Protein tyrosine and serine/threonine kinase
TRINITY_DN304_c0_g1_i2.p2	PF00125.26	Core histone H2A/H2B/H3/H4
TRINITY_DN33101_c0_g1_i7.p3	PF03124.16	EXS family
TRINITY_DN2398_c0_g1_i13.p1	PF00454.29	Phosphatidylinositol 3- and 4-kinase
TRINITY_DN9582_c0_g2_i1.p1	PF00069.27	Protein kinase domain
TRINITY_DN14082_c0_g1_i6.p1	PF00450.24	Serine carboxypeptidase
TRINITY_DN820_c0_g1_i22.p1	PF02301.20	HORMA domain
TRINITY_DN6678_c0_g2_i3.p1	PF00067.24	Cytochrome P450
TRINITY_DN12730_c0_g1_i4.p1	PF13668.8	Ferritin-like domain
TRINITY_DN1563_c0_g4_i1.p1	PF13840.8	ACT domain
TRINITY_DN31880_c0_g1_i4.p1	PF08063.14	PADR1 (NUC008) domain
TRINITY_DN157374_c0_g1_i1.p1	PF03141.18	Putative S-adenosyl-L-methionine-dependent methyltransferase
TRINITY_DN18928_c0_g3_i2.p1	PF00067.24	Cytochrome P450
TRINITY_DN1825_c0_g1_i1.p2	PF13679.8	Methyltransferase domain
TRINITY_DN21979_c1_g3_i1.p1	PF12708.9	Pectate lyase superfamily protein
TRINITY_DN7488_c0_g1_i2.p1	PF00069.27	Protein kinase domain
TRINITY_DN6710_c0_g1_i16.p3	PF06182.13	ABC-2 family transporter protein
TRINITY_DN33101_c0_g1_i8.p1	PF03124.16	EXS family
TRINITY_DN3524_c0_g1_i4.p1	PF03106.17	WRKY DNA -binding domain
TRINITY_DN9582_c0_g2_i1.p1	PF12799.9	Leucine Rich repeats (2 copies)
TRINITY_DN660_c0_g3_i1.p1	PF08153.14	NGP1NT (NUC091) domain
TRINITY_DN820_c0_g1_i24.p1	PF02301.20	HORMA domain
TRINITY_DN401_c0_g1_i7.p1	PF00067.24	Cytochrome P450
TRINITY_DN1425_c0_g1_i4.p1	PF13921.8	Myb-like DNA-binding domain
TRINITY_DN63657_c0_g1_i1.p1	PF08263.14	Leucine rich repeat N-terminal domain
TRINITY_DN4371_c1_g1_i12.p1	PF03398.16	Regulator of Vps4 activity in the MVB pathway
TRINITY_DN8622_c0_g3_i1.p2	PF00183.20	Hsp90 protein
TRINITY_DN5302_c0_g2_i10.p2	PF12799.9	Leucine Rich repeats (2 copies)
TRINITY_DN2888_c0_g3_i2.p1	PF07725.14	Leucine Rich Repeat
TRINITY_DN13659_c0_g1_i2.p1	PF00035.28	Double-stranded RNA binding motif
TRINITY_DN558_c1_g1_i10.p2	PF13371.8	Tetratricopeptide repeat
TRINITY_DN194_c1_g3_i2.p1	PF18444.3	RNA recognition motif
TRINITY_DN9001_c0_g1_i5.p1	PF10248.11	Myelodysplasia-myeloid leukemia factor 1-interacting protein
TRINITY_DN10359_c0_g1_i4.p1	PF12697.9	Alpha/beta hydrolase family
TRINITY_DN29653_c0_g2_i1.p1	PF00240.25	Ubiquitin family
TRINITY_DN1001_c0_g1_i9.p1	PF01073.21	3-beta hydroxysteroid dehydrogenase/isomerase family
TRINITY_DN27438_c0_g1_i15.p1	PF18396.3	TANK binding kinase 1 ubiquitin-like domain
TRINITY_DN29118_c0_g1_i1.p1	PF07714.19	Protein tyrosine and serine/threonine kinase
TRINITY_DN102981_c1_g1_i1.p2	PF00153.29	Mitochondrial carrier protein
TRINITY_DN8498_c0_g1_i2.p1	PF07676.14	WD40-like Beta Propeller Repeat
TRINITY_DN38355_c0_g1_i7.p1	PF02225.24	PA domain
TRINITY_DN5137_c1_g1_i1.p1	PF02358.18	Trehalose-phosphatase
TRINITY_DN34814_c0_g1_i2.p1	PF01794.21	Ferric reductase like transmembrane component
TRINITY_DN38212_c0_g1_i6.p1	PF07714.19	Protein tyrosine and serine/threonine kinase
TRINITY_DN6884_c0_g1_i15.p1	PF13414.8	TPR repeat
TRINITY_DN1656_c0_g1_i7.p1	PF00141.25	Peroxidase
TRINITY_DN17627_c0_g1_i5.p1	PF01565.25	FAD binding domain
TRINITY_DN4255_c2_g1_i2.p1	PF05142.14	Domain of unknown function (DUF702)
TRINITY_DN19385_c1_g1_i3.p1	PF03790.15	KNOX1 domain
TRINITY_DN1218_c0_g1_i3.p1	PF12697.9	Alpha/beta hydrolase family
TRINITY_DN5912_c0_g1_i1.p1	PF05920.13	Homeobox KN domain
TRINITY_DN8559_c0_g1_i2.p1	PF07859.15	alpha/beta hydrolase fold
TRINITY_DN3240_c0_g1_i2.p3	PF02365.17	No apical meristem (NAM) protein
TRINITY_DN5171_c0_g1_i11.p1	PF06911.14	Senescence-associated protein
TRINITY_DN30501_c0_g1_i1.p1	PF13625.8	Helicase conserved C-terminal domain
TRINITY_DN5682_c0_g1_i8.p1	PF13921.8	Myb-like DNA-binding domain
TRINITY_DN20685_c0_g1_i2.p1	PF08263.14	Leucine rich repeat N-terminal domain
TRINITY_DN5682_c0_g1_i1.p2	PF13921.8	Myb-like DNA-binding domain
TRINITY_DN5849_c0_g1_i1.p1	PF03110.16	SBP domain
TRINITY_DN4945_c0_g1_i10.p1	PF14215.8	bHLH-MYC and R2R3-MYB transcription factors N-terminal
TRINITY_DN1289_c0_g2_i7.p2	PF16131.7	Torus domain
TRINITY_DN17413_c0_g2_i2.p1	PF06884.13	Protein of unknown function (DUF1264)
TRINITY_DN18796_c0_g1_i4.p2	PF07714.19	Protein tyrosine and serine/threonine kinase
TRINITY_DN1331_c1_g1_i2.p1	PF00201.20	UDP-glucoronosyl and UDP-glucosyl transferase
TRINITY_DN13659_c0_g1_i10.p2	PF12212.10	PAZ domain
TRINITY_DN16086_c0_g1_i18.p1	PF00919.22	Uncharacterized protein family UPF0004
TRINITY_DN5171_c0_g1_i2.p2	PF06911.14	Senescence-associated protein
TRINITY_DN4590_c0_g1_i21.p1	PF01595.22	Cyclin M transmembrane N-terminal domain
TRINITY_DN25694_c0_g1_i7.p1	PF00083.26	Sugar (and other) transporter
TRINITY_DN3198_c0_g1_i2.p1	PF13456.8	Reverse transcriptase-like
TRINITY_DN2648_c0_g1_i1.p1	PF06723.15	MreB/Mbl protein
TRINITY_DN5353_c0_g1_i2.p1	PF03924.15	CHASE domain
TRINITY_DN4638_c0_g1_i5.p3	PF01823.21	MAC/Perforin domain
TRINITY_DN27438_c0_g1_i15.p1	PF05031.14	Iron Transport-associated domain
TRINITY_DN31880_c0_g1_i7.p1	PF18428.3	BRCA1 C Terminus (BRCT) domain
TRINITY_DN6910_c0_g2_i3.p1	PF05142.14	Domain of unknown function (DUF702)
TRINITY_DN3471_c0_g1_i3.p1	PF00646.35	F-box domain
TRINITY_DN6884_c0_g1_i10.p1	PF18253.3	Hsp70-interacting protein N N-terminal domain
TRINITY_DN2369_c0_g1_i5.p1	PF03479.17	Plants and Prokaryotes Conserved (PCC) domain
TRINITY_DN6538_c1_g2_i1.p1	PF00183.20	Hsp90 protein
TRINITY_DN51299_c1_g1_i1.p1	PF13833.8	EF-hand domain pair
TRINITY_DN5912_c0_g1_i7.p2	PF05920.13	Homeobox KN domain
TRINITY_DN626_c0_g2_i3.p1	PF03106.17	WRKY DNA -binding domain
TRINITY_DN4401_c0_g3_i2.p1	PF00170.23	bZIP transcription factor
TRINITY_DN6449_c0_g1_i14.p1	PF02463.21	RecF/RecN/SMC N terminal domain
TRINITY_DN9467_c0_g1_i4.p1	PF01070.20	FMN-dependent dehydrogenase
TRINITY_DN5292_c0_g1_i3.p1	PF00010.28	Helix-loop-helix DNA-binding domain
TRINITY_DN11769_c0_g1_i1.p1	PF12894.9	Anaphase-promoting complex subunit 4 WD40 domain
TRINITY_DN8225_c0_g2_i4.p1	PF00931.24	NB-ARC domain
TRINITY_DN45707_c0_g1_i1.p1	PF13243.8	Squalene-hopene cyclase C-terminal domain
TRINITY_DN3434_c0_g1_i4.p1	PF06149.14	Protein of unknown function (DUF969)
TRINITY_DN15023_c0_g1_i4.p1	PF13738.8	Pyridine nucleotide-disulphide oxidoreductase
TRINITY_DN6449_c0_g1_i10.p2	PF12848.9	ABC transporter
TRINITY_DN1476_c0_g4_i1.p1	PF00012.22	Hsp70 protein
TRINITY_DN3617_c0_g2_i14.p2	PF01477.25	PLAT/LH2 domain
TRINITY_DN194_c1_g3_i1.p1	PF18444.3	RNA recognition motif
TRINITY_DN28374_c0_g1_i2.p1	PF00106.27	short chain dehydrogenase
TRINITY_DN8602_c0_g1_i5.p1	PF00155.23	Aminotransferase class I and II
TRINITY_DN4034_c0_g1_i2.p1	PF00201.20	UDP-glucoronosyl and UDP-glucosyl transferase
TRINITY_DN24371_c0_g1_i1.p1	PF07727.16	Reverse transcriptase (RNA-dependent DNA polymerase)
TRINITY_DN6910_c0_g2_i8.p1	PF05142.14	Domain of unknown function (DUF702)
TRINITY_DN220_c0_g2_i10.p1	PF07714.19	Protein tyrosine and serine/threonine kinase
TRINITY_DN666_c0_g2_i2.p1	PF13676.8	TIR domain
TRINITY_DN17442_c0_g1_i2.p1	PF05512.13	AWPM-19-like family
TRINITY_DN64_c0_g1_i1.p1	PF05920.13	Homeobox KN domain
TRINITY_DN2374_c0_g1_i13.p1	PF03124.16	EXS family
TRINITY_DN25304_c0_g1_i1.p1	PF08264.15	Anticodon-binding domain of tRNA ligase
TRINITY_DN7285_c0_g1_i2.p1	PF16912.7	Glucose dehydrogenase C-terminus
TRINITY_DN55636_c0_g1_i6.p2	PF00891.20	O-methyltransferase domain
TRINITY_DN14659_c0_g1_i1.p1	PF07728.16	AAA domain (dynein-related subfamily)
TRINITY_DN4638_c0_g1_i1.p6	PF01823.21	MAC/Perforin domain
TRINITY_DN12720_c1_g1_i2.p1	PF04782.14	Protein of unknown function (DUF632)
TRINITY_DN437_c0_g1_i5.p1	PF13492.8	GAF domain
TRINITY_DN27438_c0_g1_i15.p1	PF00240.25	Ubiquitin family
TRINITY_DN1744_c2_g1_i7.p1	PF04526.15	Protein of unknown function (DUF568)
TRINITY_DN8012_c0_g1_i5.p1	PF03106.17	WRKY DNA -binding domain
TRINITY_DN7348_c0_g1_i2.p1	PF16842.7	Occluded RNA-recognition motif
TRINITY_DN6449_c0_g1_i11.p1	PF12848.9	ABC transporter
TRINITY_DN280_c0_g2_i1.p1	PF13738.8	Pyridine nucleotide-disulphide oxidoreductase
TRINITY_DN3256_c0_g1_i13.p2	PF15288.8	Zinc knuckle
TRINITY_DN4226_c0_g1_i5.p1	PF00294.26	pfkB family carbohydrate kinase
TRINITY_DN6486_c0_g1_i1.p2	PF01274.24	Malate synthase
TRINITY_DN13659_c0_g1_i13.p2	PF00270.31	DEAD/DEAH box helicase
TRINITY_DN8559_c0_g1_i2.p1	PF12697.9	Alpha/beta hydrolase family
TRINITY_DN626_c0_g2_i2.p1	PF03106.17	WRKY DNA -binding domain
TRINITY_DN2657_c0_g1_i16.p1	PF00248.23	Aldo/keto reductase family
TRINITY_DN3256_c0_g1_i9.p2	PF00977.23	Histidine biosynthesis protein
TRINITY_DN2648_c0_g2_i1.p1	PF00012.22	Hsp70 protein
TRINITY_DN5465_c0_g1_i3.p1	PF00764.21	Arginosuccinate synthase
TRINITY_DN4034_c0_g1_i6.p1	PF00201.20	UDP-glucoronosyl and UDP-glucosyl transferase
TRINITY_DN2888_c0_g3_i2.p1	PF08263.14	Leucine rich repeat N-terminal domain
TRINITY_DN5334_c0_g2_i5.p1	PF12799.9	Leucine Rich repeats (2 copies)
TRINITY_DN1779_c1_g1_i14.p1	PF00300.24	Histidine phosphatase superfamily (branch 1)
TRINITY_DN27438_c0_g1_i15.p1	PF18579.3	Rubisco accumulation factor 1 helix turn helix domain
TRINITY_DN2109_c0_g2_i2.p1	PF17886.3	HSP20-like domain found in ArsA
TRINITY_DN18246_c0_g1_i2.p1	PF13516.8	Leucine Rich repeat
TRINITY_DN2441_c0_g1_i4.p1	PF00011.23	Hsp20/alpha crystallin family
TRINITY_DN628_c0_g1_i5.p1	PF03224.16	V-ATPase subunit H
TRINITY_DN74739_c0_g1_i1.p1	PF00520.33	Ion transport protein
TRINITY_DN791_c0_g1_i5.p1	PF16131.7	Torus domain
TRINITY_DN437_c0_g1_i1.p1	PF00360.22	Phytochrome region
TRINITY_DN74739_c0_g1_i1.p1	PF00027.31	Cyclic nucleotide-binding domain
TRINITY_DN24065_c0_g1_i1.p1	PF00201.20	UDP-glucoronosyl and UDP-glucosyl transferase
TRINITY_DN4638_c0_g1_i6.p3	PF01823.21	MAC/Perforin domain
TRINITY_DN22809_c0_g1_i4.p1	PF10417.11	C-terminal domain of 1-Cys peroxiredoxin
TRINITY_DN464_c1_g1_i16.p2	PF14622.8	Ribonuclease-III-like
TRINITY_DN10565_c0_g2_i6.p1	PF00464.21	Serine hydroxymethyltransferase
TRINITY_DN12654_c0_g1_i3.p1	PF07714.19	Protein tyrosine and serine/threonine kinase
TRINITY_DN4590_c0_g1_i13.p1	PF00571.30	CBS domain
TRINITY_DN7929_c0_g2_i6.p2	PF01657.19	Salt stress response/antifungal
TRINITY_DN18796_c0_g1_i4.p2	PF00954.22	S-locus glycoprotein domain
TRINITY_DN8261_c0_g1_i5.p1	PF07714.19	Protein tyrosine and serine/threonine kinase
TRINITY_DN10017_c0_g1_i1.p1	PF00230.22	Major intrinsic protein
TRINITY_DN4923_c0_g1_i6.p1	PF01699.26	Sodium/calcium exchanger protein
TRINITY_DN81656_c0_g1_i10.p3	PF12799.9	Leucine Rich repeats (2 copies)
TRINITY_DN4638_c0_g1_i8.p4	PF01823.21	MAC/Perforin domain
TRINITY_DN4893_c1_g1_i1.p1	PF17886.3	HSP20-like domain found in ArsA
TRINITY_DN27278_c0_g1_i2.p1	PF07478.15	D-ala D-ala ligase C-terminus
TRINITY_DN641_c0_g3_i3.p1	PF00183.20	Hsp90 protein
TRINITY_DN10227_c0_g1_i9.p1	PF12357.10	Phospholipase D C terminal
TRINITY_DN5970_c0_g1_i31.p3	PF17766.3	Fibronectin type-III domain
TRINITY_DN464_c1_g2_i1.p1	PF13625.8	Helicase conserved C-terminal domain
TRINITY_DN5027_c1_g1_i3.p1	PF13249.8	Squalene-hopene cyclase N-terminal domain
TRINITY_DN1196_c0_g1_i1.p1	PF00862.21	Sucrose synthase
TRINITY_DN1656_c0_g1_i6.p1	PF00141.25	Peroxidase
TRINITY_DN23040_c1_g1_i1.p1	PF13960.8	Domain of unknown function (DUF4218)
TRINITY_DN2759_c0_g1_i2.p2	PF00069.27	Protein kinase domain
TRINITY_DN4448_c0_g1_i1.p1	PF03328.16	HpcH/HpaI aldolase/citrate lyase family
TRINITY_DN17749_c0_g1_i2.p1	PF17123.7	RING-like zinc finger
TRINITY_DN4216_c1_g1_i3.p1	PF17886.3	HSP20-like domain found in ArsA
TRINITY_DN475_c0_g2_i1.p1	PF08659.12	KR domain
TRINITY_DN6451_c0_g1_i2.p1	PF01277.19	Oleosin
TRINITY_DN10137_c0_g2_i1.p1	PF04669.15	Polysaccharide biosynthesis
TRINITY_DN5912_c0_g1_i4.p1	PF05920.13	Homeobox KN domain
TRINITY_DN10359_c0_g1_i7.p1	PF07859.15	alpha/beta hydrolase fold
TRINITY_DN3198_c0_g1_i2.p1	PF01599.21	Ribosomal protein S27a
TRINITY_DN6485_c0_g1_i4.p1	PF13840.8	ACT domain
TRINITY_DN6373_c0_g1_i3.p1	PF05633.13	Protein BYPASS1-related
TRINITY_DN2620_c0_g3_i6.p1	PF13561.8	Enoyl-(Acyl carrier protein) reductase
TRINITY_DN23761_c0_g1_i1.p1	PF07725.14	Leucine Rich Repeat
TRINITY_DN7140_c0_g2_i2.p1	PF00860.22	Permease family
TRINITY_DN3999_c1_g1_i1.p1	PF13555.8	P-loop containing region of AAA domain
TRINITY_DN1325_c0_g1_i19.p2	PF20073.1	Domain of unknown function (DUF6469)
TRINITY_DN14037_c0_g1_i1.p1	PF03018.16	Dirigent-like protein
TRINITY_DN5334_c0_g2_i19.p1	PF12799.9	Leucine Rich repeats (2 copies)
TRINITY_DN31880_c0_g1_i7.p2	PF08063.14	PADR1 (NUC008) domain
TRINITY_DN215_c0_g1_i1.p1	PF00135.30	Carboxylesterase family
TRINITY_DN2678_c0_g1_i4.p1	PF00800.20	Prephenate dehydratase
TRINITY_DN10227_c0_g1_i16.p1	PF12357.10	Phospholipase D C terminal
TRINITY_DN54406_c0_g1_i3.p1	PF04852.14	Protein of unknown function (DUF640)
TRINITY_DN1452_c0_g1_i24.p1	PF00106.27	short chain dehydrogenase
TRINITY_DN396_c0_g1_i2.p2	PF02309.18	AUX/IAA family
TRINITY_DN5797_c0_g1_i7.p1	PF00067.24	Cytochrome P450
TRINITY_DN24371_c0_g1_i1.p1	PF13456.8	Reverse transcriptase-like
TRINITY_DN3015_c0_g2_i6.p1	PF01636.25	Phosphotransferase enzyme family
TRINITY_DN6710_c0_g1_i14.p4	PF02463.21	RecF/RecN/SMC N terminal domain
TRINITY_DN12273_c0_g1_i1.p1	PF13964.8	Kelch motif
TRINITY_DN739_c0_g1_i5.p1	PF03822.16	NAF domain
TRINITY_DN51181_c0_g1_i2.p2	PF13850.8	Endoplasmic Reticulum-Golgi Intermediate Compartment (ERGIC)
TRINITY_DN9705_c0_g1_i3.p1	PF16017.7	BTB/POZ domain
TRINITY_DN5912_c0_g1_i4.p1	PF00046.31	Homeodomain
TRINITY_DN3434_c0_g1_i3.p1	PF13881.8	Ubiquitin-2 like Rad60 SUMO-like
TRINITY_DN12730_c0_g1_i4.p2	PF13668.8	Ferritin-like domain
TRINITY_DN3434_c0_g1_i3.p1	PF18396.3	TANK binding kinase 1 ubiquitin-like domain
TRINITY_DN5292_c0_g1_i1.p1	PF00010.28	Helix-loop-helix DNA-binding domain
TRINITY_DN1717_c0_g1_i1.p1	PF02985.24	HEAT repeat
TRINITY_DN26391_c0_g1_i1.p1	PF13921.8	Myb-like DNA-binding domain
TRINITY_DN765_c1_g1_i3.p1	PF07690.18	Major Facilitator Superfamily
TRINITY_DN5137_c1_g1_i1.p1	PF00982.23	Glycosyltransferase family 20
TRINITY_DN5353_c0_g1_i2.p1	PF00072.26	Response regulator receiver domain
TRINITY_DN121609_c0_g1_i1.p1	PF01095.21	Pectinesterase
TRINITY_DN2904_c0_g1_i3.p1	PF00069.27	Protein kinase domain
TRINITY_DN8885_c0_g1_i14.p1	PF07714.19	Protein tyrosine and serine/threonine kinase
TRINITY_DN16086_c0_g1_i1.p1	PF00919.22	Uncharacterized protein family UPF0004
TRINITY_DN31967_c0_g1_i1.p1	PF01764.27	Lipase (class 3)
TRINITY_DN15874_c0_g1_i4.p2	PF00067.24	Cytochrome P450
TRINITY_DN24326_c0_g1_i3.p1	PF02362.23	B3 DNA binding domain
TRINITY_DN739_c0_g1_i4.p1	PF00069.27	Protein kinase domain
TRINITY_DN304_c0_g1_i2.p2	PF02969.19	TATA box binding protein associated factor (TAF)
TRINITY_DN4638_c0_g1_i3.p4	PF01823.21	MAC/Perforin domain
TRINITY_DN5334_c0_g2_i19.p1	PF13855.8	Leucine rich repeat
TRINITY_DN21849_c0_g1_i2.p1	PF02298.19	Plastocyanin-like domain
TRINITY_DN4371_c1_g1_i5.p1	PF03398.16	Regulator of Vps4 activity in the MVB pathway
TRINITY_DN1888_c0_g3_i1.p2	PF02183.20	Homeobox associated leucine zipper
TRINITY_DN6449_c0_g1_i14.p2	PF01926.25	50S ribosome-binding GTPase
TRINITY_DN437_c0_g1_i5.p1	PF00360.22	Phytochrome region
TRINITY_DN6884_c0_g1_i14.p1	PF13371.8	Tetratricopeptide repeat
TRINITY_DN4638_c0_g1_i11.p1	PF00978.23	RNA dependent RNA polymerase
TRINITY_DN17627_c0_g1_i2.p1	PF08031.14	Berberine and berberine like
TRINITY_DN791_c0_g1_i5.p1	PF18044.3	CCCH-type zinc finger
TRINITY_DN55636_c0_g1_i6.p2	PF16864.7	Dimerisation domain
TRINITY_DN1929_c0_g1_i1.p1	PF08282.14	haloacid dehalogenase-like hydrolase
TRINITY_DN14149_c0_g2_i2.p1	PF02450.17	Lecithin:cholesterol acyltransferase
TRINITY_DN7488_c0_g1_i2.p1	PF07725.14	Leucine Rich Repeat
TRINITY_DN11463_c0_g1_i2.p1	PF12937.9	F-box-like
TRINITY_DN8261_c0_g1_i7.p1	PF13855.8	Leucine rich repeat
TRINITY_DN2925_c0_g1_i2.p1	PF00168.32	C2 domain
TRINITY_DN5439_c0_g1_i4.p1	PF12697.9	Alpha/beta hydrolase family
TRINITY_DN2663_c1_g1_i2.p2	PF13921.8	Myb-like DNA-binding domain
TRINITY_DN25954_c0_g1_i13.p1	PF01027.22	Inhibitor of apoptosis-promoting Bax1
TRINITY_DN8622_c0_g1_i2.p1	PF00183.20	Hsp90 protein
TRINITY_DN2663_c1_g1_i2.p1	PF13921.8	Myb-like DNA-binding domain
TRINITY_DN770_c1_g1_i2.p1	PF00447.19	HSF-type DNA-binding
TRINITY_DN38399_c0_g2_i3.p2	PF02705.18	K+ potassium transporter
TRINITY_DN1503_c1_g3_i1.p1	PF06723.15	MreB/Mbl protein
TRINITY_DN14072_c0_g1_i7.p2	PF14226.8	non-haem dioxygenase in morphine synthesis N-terminal
TRINITY_DN626_c0_g1_i3.p2	PF13671.8	AAA domain
TRINITY_DN1139_c3_g1_i1.p1	PF12799.9	Leucine Rich repeats (2 copies)
TRINITY_DN26823_c0_g1_i2.p1	PF00450.24	Serine carboxypeptidase
TRINITY_DN24326_c0_g1_i3.p1	PF02309.18	AUX/IAA family
TRINITY_DN1370_c0_g1_i7.p2	PF01490.20	Transmembrane amino acid transporter protein
TRINITY_DN316_c0_g1_i1.p1	PF03790.15	KNOX1 domain
TRINITY_DN316_c0_g1_i4.p1	PF03789.15	ELK domain
TRINITY_DN51554_c0_g1_i1.p1	PF00069.27	Protein kinase domain
TRINITY_DN15617_c1_g1_i3.p1	PF05920.13	Homeobox KN domain
TRINITY_DN8466_c1_g1_i4.p1	PF00332.20	Glycosyl hydrolases family 17
TRINITY_DN33101_c0_g1_i2.p3	PF03105.21	SPX domain
TRINITY_DN19385_c1_g1_i3.p1	PF05920.13	Homeobox KN domain
TRINITY_DN4638_c0_g1_i9.p3	PF01823.21	MAC/Perforin domain
TRINITY_DN6710_c0_g1_i16.p3	PF02463.21	RecF/RecN/SMC N terminal domain
TRINITY_DN5143_c0_g1_i3.p1	PF07728.16	AAA domain (dynein-related subfamily)
TRINITY_DN3434_c0_g1_i4.p1	PF13881.8	Ubiquitin-2 like Rad60 SUMO-like
TRINITY_DN1452_c0_g1_i24.p1	PF13561.8	Enoyl-(Acyl carrier protein) reductase
TRINITY_DN1276_c0_g1_i1.p1	PF04981.15	NMD3 family
TRINITY_DN316_c0_g1_i2.p1	PF03790.15	KNOX1 domain
TRINITY_DN3198_c0_g1_i1.p1	PF17963.3	Bacterial Ig domain
TRINITY_DN3471_c0_g1_i2.p1	PF00646.35	F-box domain
TRINITY_DN3198_c0_g1_i2.p1	PF00240.25	Ubiquitin family
TRINITY_DN215_c1_g1_i10.p1	PF07859.15	alpha/beta hydrolase fold
TRINITY_DN1370_c0_g1_i13.p2	PF01490.20	Transmembrane amino acid transporter protein
TRINITY_DN2904_c0_g1_i4.p1	PF07725.14	Leucine Rich Repeat
TRINITY_DN10227_c0_g1_i1.p2	PF00614.24	Phospholipase D Active site motif
TRINITY_DN25694_c0_g1_i7.p1	PF13347.8	MFS/sugar transport protein
TRINITY_DN6399_c0_g2_i11.p1	PF13561.8	Enoyl-(Acyl carrier protein) reductase
TRINITY_DN6778_c1_g1_i2.p1	PF05729.14	NACHT domain
TRINITY_DN9480_c0_g1_i3.p1	PF05221.19	S-adenosyl-L-homocysteine hydrolase
TRINITY_DN437_c0_g1_i5.p1	PF12860.9	PAS fold
TRINITY_DN10227_c0_g1_i9.p1	PF00168.32	C2 domain
TRINITY_DN394_c0_g1_i2.p1	PF00703.23	Glycosyl hydrolases family 2
TRINITY_DN18246_c0_g1_i2.p1	PF13855.8	Leucine rich repeat
TRINITY_DN1331_c1_g1_i6.p1	PF00201.20	UDP-glucoronosyl and UDP-glucosyl transferase
TRINITY_DN52845_c0_g2_i3.p1	PF02987.18	Late embryogenesis abundant protein
TRINITY_DN33101_c0_g1_i12.p2	PF03105.21	SPX domain
TRINITY_DN6399_c0_g2_i6.p1	PF00106.27	short chain dehydrogenase
TRINITY_DN437_c0_g1_i2.p1	PF00360.22	Phytochrome region
TRINITY_DN3907_c0_g1_i2.p1	PF00407.21	Pathogenesis-related protein Bet v 1 family
TRINITY_DN7471_c0_g1_i3.p1	PF07842.14	GC-rich sequence DNA-binding factor-like protein
TRINITY_DN29653_c0_g2_i1.p1	PF18579.3	Rubisco accumulation factor 1 helix turn helix domain
TRINITY_DN1656_c0_g1_i2.p1	PF00141.25	Peroxidase
TRINITY_DN4952_c0_g3_i1.p1	PF00069.27	Protein kinase domain
TRINITY_DN5143_c0_g1_i3.p1	PF13191.8	AAA ATPase domain
TRINITY_DN6303_c0_g1_i11.p2	PF04727.15	ELMO/CED-12 family
TRINITY_DN24195_c0_g1_i13.p1	PF13952.8	Domain of unknown function (DUF4216)
TRINITY_DN1289_c0_g2_i1.p2	PF17214.5	KH domain
TRINITY_DN24866_c0_g1_i1.p1	PF17214.5	KH domain
TRINITY_DN3240_c0_g1_i2.p1	PF04755.14	PAP_fibrillin
TRINITY_DN6332_c1_g1_i4.p1	PF02319.22	E2F/DP family winged-helix DNA-binding domain
TRINITY_DN2663_c1_g1_i2.p2	PF13873.8	Myb/SANT-like DNA-binding domain
TRINITY_DN7285_c0_g1_i7.p1	PF13602.8	Zinc-binding dehydrogenase
TRINITY_DN316_c0_g1_i3.p1	PF03790.15	KNOX1 domain
TRINITY_DN6884_c0_g1_i2.p1	PF14595.8	Thioredoxin
TRINITY_DN1269_c0_g1_i3.p1	PF02458.17	Transferase family
TRINITY_DN8927_c0_g1_i4.p1	PF17675.3	Apg6 coiled-coil region
TRINITY_DN12535_c0_g1_i3.p3	PF13041.8	PPR repeat family
TRINITY_DN3198_c0_g1_i1.p1	PF06149.14	Protein of unknown function (DUF969)
TRINITY_DN4952_c0_g3_i1.p1	PF07714.19	Protein tyrosine and serine/threonine kinase
TRINITY_DN3256_c0_g1_i9.p2	PF03060.17	Nitronate monooxygenase
TRINITY_DN7832_c1_g2_i1.p1	PF00892.22	EamA-like transporter family
TRINITY_DN28171_c0_g1_i11.p2	PF03893.18	Lipase 3 N-terminal region
TRINITY_DN12125_c0_g1_i3.p1	PF16135.7	Tify domain binding domain
TRINITY_DN5663_c0_g1_i7.p2	PF01946.19	Thi4 family
TRINITY_DN2663_c1_g1_i1.p1	PF13921.8	Myb-like DNA-binding domain
TRINITY_DN5912_c0_g1_i7.p2	PF07526.13	Associated with HOX
TRINITY_DN6884_c0_g1_i11.p1	PF14595.8	Thioredoxin
TRINITY_DN666_c0_g2_i2.p1	PF12799.9	Leucine Rich repeats (2 copies)
TRINITY_DN15874_c0_g1_i5.p2	PF00067.24	Cytochrome P450
TRINITY_DN3198_c0_g1_i2.p1	PF12977.9	Domain of Unknown Function with PDB structure (DUF3861)
TRINITY_DN23_c1_g1_i1.p1	PF06723.15	MreB/Mbl protein
TRINITY_DN739_c0_g1_i1.p1	PF03109.18	ABC1 atypical kinase-like domain
TRINITY_DN10068_c0_g1_i3.p2	PF13921.8	Myb-like DNA-binding domain
TRINITY_DN18928_c0_g1_i7.p1	PF00067.24	Cytochrome P450
TRINITY_DN4034_c0_g1_i11.p1	PF00201.20	UDP-glucoronosyl and UDP-glucosyl transferase
TRINITY_DN10359_c0_g1_i7.p1	PF01738.20	Dienelactone hydrolase family
TRINITY_DN1269_c0_g1_i3.p2	PF12799.9	Leucine Rich repeats (2 copies)
TRINITY_DN3198_c0_g1_i1.p1	PF20147.1	Crinkler effector protein N-terminal domain
TRINITY_DN765_c1_g1_i3.p1	PF06813.15	Nodulin-like
TRINITY_DN5334_c0_g2_i19.p1	PF12819.9	Malectin-like domain
TRINITY_DN6142_c0_g4_i2.p1	PF00226.33	DnaJ domain
TRINITY_DN12720_c1_g1_i1.p1	PF04782.14	Protein of unknown function (DUF632)
TRINITY_DN215_c0_g1_i2.p1	PF07859.15	alpha/beta hydrolase fold
TRINITY_DN18907_c0_g1_i3.p1	PF07732.17	Multicopper oxidase
TRINITY_DN1139_c3_g1_i1.p1	PF07714.19	Protein tyrosine and serine/threonine kinase
TRINITY_DN4566_c0_g1_i1.p2	PF00892.22	EamA-like transporter family
TRINITY_DN9261_c0_g1_i3.p1	PF00641.20	Zn-finger in Ran binding protein and others
TRINITY_DN4590_c0_g1_i21.p1	PF00571.30	CBS domain
TRINITY_DN34407_c0_g2_i1.p1	PF06172.13	Cupin superfamily (DUF985)
TRINITY_DN20979_c0_g1_i4.p1	PF02421.20	Ferrous iron transport protein B
TRINITY_DN10565_c0_g2_i4.p1	PF00464.21	Serine hydroxymethyltransferase
TRINITY_DN62_c0_g2_i1.p1	PF07478.15	D-ala D-ala ligase C-terminus
TRINITY_DN14015_c0_g1_i8.p1	PF01643.19	Acyl-ACP thioesterase
TRINITY_DN1308_c0_g1_i8.p1	PF17005.7	WD40-like domain
TRINITY_DN8834_c0_g1_i11.p2	PF13460.8	NAD(P)H-binding
TRINITY_DN7348_c0_g1_i5.p1	PF16842.7	Occluded RNA-recognition motif
TRINITY_DN437_c0_g1_i1.p1	PF13426.9	PAS domain
TRINITY_DN9160_c0_g2_i1.p1	PF13671.8	AAA domain
TRINITY_DN5682_c0_g1_i7.p1	PF13921.8	Myb-like DNA-binding domain
TRINITY_DN618_c0_g1_i6.p1	PF00501.30	AMP-binding enzyme
TRINITY_DN64_c0_g1_i1.p1	PF03791.15	KNOX2 domain
TRINITY_DN4566_c0_g1_i10.p1	PF00892.22	EamA-like transporter family
TRINITY_DN1289_c0_g2_i10.p3	PF17214.5	KH domain
TRINITY_DN820_c0_g1_i5.p1	PF02301.20	HORMA domain
TRINITY_DN2904_c0_g1_i10.p1	PF13855.8	Leucine rich repeat
TRINITY_DN749_c0_g1_i6.p1	PF13671.8	AAA domain
TRINITY_DN626_c0_g2_i4.p1	PF03106.17	WRKY DNA -binding domain
TRINITY_DN3434_c0_g1_i3.p1	PF06427.13	UDP-glucose:Glycoprotein Glucosyltransferase
TRINITY_DN5334_c0_g2_i5.p1	PF13855.8	Leucine rich repeat
TRINITY_DN5176_c0_g1_i5.p1	PF13371.8	Tetratricopeptide repeat
TRINITY_DN884_c0_g1_i7.p1	PF13602.8	Zinc-binding dehydrogenase
TRINITY_DN10123_c0_g1_i3.p1	PF01650.20	Peptidase C13 family
TRINITY_DN646_c0_g2_i1.p1	PF01453.26	D-mannose binding lectin
TRINITY_DN4123_c0_g1_i10.p1	PF18290.3	Nudix hydrolase domain
TRINITY_DN20979_c0_g1_i4.p1	PF06071.15	Protein of unknown function (DUF933)
TRINITY_DN8834_c0_g1_i11.p2	PF13440.8	Polysaccharide biosynthesis protein
TRINITY_DN396_c0_g1_i5.p1	PF00847.22	AP2 domain
TRINITY_DN5663_c0_g1_i6.p1	PF13450.8	NAD(P)-binding Rossmann-like domain
TRINITY_DN29653_c0_g2_i1.p1	PF18396.3	TANK binding kinase 1 ubiquitin-like domain
TRINITY_DN626_c0_g1_i6.p2	PF06414.14	Zeta toxin
TRINITY_DN820_c0_g1_i17.p1	PF02301.20	HORMA domain
TRINITY_DN25694_c0_g1_i9.p1	PF13347.8	MFS/sugar transport protein
TRINITY_DN418_c0_g1_i14.p1	PF00118.26	TCP-1/cpn60 chaperonin family
TRINITY_DN475_c0_g2_i5.p1	PF08659.12	KR domain
TRINITY_DN4638_c0_g1_i5.p2	PF01823.21	MAC/Perforin domain
TRINITY_DN4625_c0_g1_i12.p2	PF13661.8	2OG-Fe(II) oxygenase superfamily
TRINITY_DN8883_c0_g3_i3.p1	PF13625.8	Helicase conserved C-terminal domain
TRINITY_DN14750_c1_g1_i2.p1	PF13855.8	Leucine rich repeat
TRINITY_DN2222_c1_g2_i5.p1	PF00337.24	Galactoside-binding lectin
TRINITY_DN14082_c0_g1_i7.p1	PF00450.24	Serine carboxypeptidase
TRINITY_DN9160_c0_g2_i1.p1	PF07728.16	AAA domain (dynein-related subfamily)
TRINITY_DN15822_c0_g4_i2.p1	PF16796.7	Microtubule binding
TRINITY_DN316_c0_g1_i3.p1	PF00046.31	Homeodomain
TRINITY_DN34407_c0_g2_i2.p1	PF06172.13	Cupin superfamily (DUF985)
TRINITY_DN9961_c0_g1_i6.p1	PF00067.24	Cytochrome P450
TRINITY_DN316_c0_g1_i1.p1	PF03789.15	ELK domain
TRINITY_DN14072_c0_g1_i3.p1	PF13661.8	2OG-Fe(II) oxygenase superfamily
TRINITY_DN1709_c0_g2_i4.p1	PF00847.22	AP2 domain
TRINITY_DN8216_c0_g2_i1.p1	PF02362.23	B3 DNA binding domain
TRINITY_DN6566_c0_g1_i2.p2	PF07821.14	Alpha-amylase C-terminal beta-sheet domain
TRINITY_DN1289_c0_g2_i10.p3	PF16131.7	Torus domain
TRINITY_DN2714_c0_g1_i8.p1	PF07859.15	alpha/beta hydrolase fold
TRINITY_DN884_c0_g1_i7.p1	PF08240.14	Alcohol dehydrogenase GroES-like domain
TRINITY_DN90_c0_g4_i9.p1	PF01373.19	Glycosyl hydrolase family 14
TRINITY_DN1758_c0_g3_i4.p5	PF00582.28	Universal stress protein family
TRINITY_DN396_c0_g1_i17.p2	PF02309.18	AUX/IAA family
TRINITY_DN5694_c0_g1_i7.p1	PF14368.8	Probable lipid transfer
TRINITY_DN4848_c0_g2_i1.p1	PF13812.8	Pentatricopeptide repeat domain
TRINITY_DN666_c0_g2_i1.p1	PF12799.9	Leucine Rich repeats (2 copies)
TRINITY_DN3302_c0_g2_i2.p1	PF13350.8	Tyrosine phosphatase family
TRINITY_DN6710_c0_g1_i14.p4	PF12848.9	ABC transporter
TRINITY_DN5143_c0_g1_i3.p1	PF01637.20	ATPase domain predominantly from Archaea
TRINITY_DN215_c1_g1_i4.p1	PF00135.30	Carboxylesterase family
TRINITY_DN20685_c0_g1_i1.p1	PF08263.14	Leucine rich repeat N-terminal domain
TRINITY_DN4123_c0_g1_i16.p1	PF18290.3	Nudix hydrolase domain
TRINITY_DN3198_c0_g1_i2.p1	PF17963.3	Bacterial Ig domain
TRINITY_DN464_c3_g2_i9.p1	PF03368.16	Dicer dimerisation domain
TRINITY_DN7413_c0_g1_i3.p1	PF13414.8	TPR repeat
TRINITY_DN130179_c0_g1_i1.p1	PF16916.7	Dimerisation domain of Zinc Transporter
TRINITY_DN7488_c0_g1_i10.p1	PF00069.27	Protein kinase domain
TRINITY_DN26593_c0_g1_i9.p1	PF01704.20	UTP--glucose-1-phosphate uridylyltransferase
TRINITY_DN4638_c0_g2_i1.p1	PF01823.21	MAC/Perforin domain
TRINITY_DN31927_c0_g2_i2.p1	PF00847.22	AP2 domain
TRINITY_DN1349_c0_g1_i8.p2	PF16488.7	Argonaute linker 2 domain
TRINITY_DN11940_c0_g1_i2.p1	PF03790.15	KNOX1 domain
TRINITY_DN2620_c0_g3_i7.p1	PF13561.8	Enoyl-(Acyl carrier protein) reductase
TRINITY_DN4123_c0_g1_i5.p1	PF18290.3	Nudix hydrolase domain
TRINITY_DN10359_c0_g1_i4.p1	PF00326.23	Prolyl oligopeptidase family
TRINITY_DN8834_c0_g2_i1.p1	PF13440.8	Polysaccharide biosynthesis protein
TRINITY_DN6778_c1_g1_i2.p1	PF17862.3	AAA+ lid domain
TRINITY_DN558_c1_g1_i10.p2	PF17177.6	Pentacotripeptide-repeat region of PRORP
TRINITY_DN5439_c0_g1_i5.p1	PF12697.9	Alpha/beta hydrolase family
TRINITY_DN23042_c0_g1_i1.p1	PF03141.18	Putative S-adenosyl-L-methionine-dependent methyltransferase
TRINITY_DN5027_c2_g2_i1.p1	PF00432.23	Prenyltransferase and squalene oxidase repeat
TRINITY_DN2648_c0_g2_i2.p1	PF06723.15	MreB/Mbl protein
TRINITY_DN4625_c0_g1_i6.p1	PF13661.8	2OG-Fe(II) oxygenase superfamily
TRINITY_DN2904_c0_g1_i9.p1	PF00069.27	Protein kinase domain
TRINITY_DN2657_c0_g1_i3.p1	PF00248.23	Aldo/keto reductase family
TRINITY_DN15822_c0_g4_i1.p1	PF00225.25	Kinesin motor domain
TRINITY_DN14082_c0_g1_i2.p1	PF00450.24	Serine carboxypeptidase
TRINITY_DN10123_c0_g1_i4.p1	PF01650.20	Peptidase C13 family
TRINITY_DN23_c0_g2_i12.p1	PF00012.22	Hsp70 protein
TRINITY_DN29653_c0_g2_i1.p1	PF10302.11	DUF2407 ubiquitin-like domain
TRINITY_DN8656_c0_g1_i8.p1	PF18404.3	Glucosyltransferase 24
TRINITY_DN1227_c0_g2_i3.p1	PF00645.20	Poly(ADP-ribose) polymerase and DNA-Ligase Zn-finger region
TRINITY_DN5293_c0_g1_i2.p1	PF06454.13	Protein of unknown function (DUF1084)
TRINITY_DN14659_c0_g1_i1.p1	PF13671.8	AAA domain
TRINITY_DN1196_c0_g1_i5.p1	PF00862.21	Sucrose synthase
TRINITY_DN4327_c0_g1_i1.p1	PF01504.20	Phosphatidylinositol-4-phosphate 5-Kinase
TRINITY_DN15023_c0_g1_i3.p1	PF01645.19	Conserved region in glutamate synthase
TRINITY_DN2657_c0_g1_i9.p1	PF00248.23	Aldo/keto reductase family
TRINITY_DN10608_c0_g1_i2.p1	PF02519.16	Auxin responsive protein
TRINITY_DN13659_c0_g1_i10.p2	PF00270.31	DEAD/DEAH box helicase
TRINITY_DN1709_c0_g2_i3.p1	PF00847.22	AP2 domain
TRINITY_DN4945_c0_g1_i15.p1	PF14215.8	bHLH-MYC and R2R3-MYB transcription factors N-terminal
TRINITY_DN15996_c0_g1_i5.p2	PF14570.8	RING/Ubox like zinc-binding domain
TRINITY_DN2620_c0_g3_i2.p1	PF13561.8	Enoyl-(Acyl carrier protein) reductase
TRINITY_DN10359_c0_g1_i2.p1	PF00326.23	Prolyl oligopeptidase family
TRINITY_DN81656_c0_g1_i18.p1	PF13855.8	Leucine rich repeat
TRINITY_DN9467_c0_g1_i7.p3	PF01070.20	FMN-dependent dehydrogenase
TRINITY_DN628_c0_g1_i5.p1	PF08609.12	Nucleotide exchange factor Fes1
TRINITY_DN5694_c0_g1_i5.p1	PF14547.8	Hydrophobic seed protein
TRINITY_DN666_c0_g2_i2.p1	PF13855.8	Leucine rich repeat
TRINITY_DN1825_c0_g1_i1.p2	PF01596.19	O-methyltransferase
TRINITY_DN20685_c0_g1_i4.p2	PF13855.8	Leucine rich repeat
TRINITY_DN7500_c0_g1_i1.p1	PF00069.27	Protein kinase domain
TRINITY_DN2714_c0_g1_i6.p1	PF12697.9	Alpha/beta hydrolase family
TRINITY_DN857_c0_g1_i11.p1	PF00722.23	Glycosyl hydrolases family 16
TRINITY_DN23_c0_g2_i6.p1	PF00012.22	Hsp70 protein
TRINITY_DN11207_c0_g1_i1.p1	PF00538.21	linker histone H1 and H5 family
TRINITY_DN2516_c1_g1_i8.p2	PF08240.14	Alcohol dehydrogenase GroES-like domain
TRINITY_DN1025_c2_g1_i4.p1	PF18029.3	Glyoxalase-like domain
TRINITY_DN6778_c1_g1_i2.p1	PF06068.15	TIP49 P-loop domain
TRINITY_DN1679_c0_g1_i5.p1	PF00069.27	Protein kinase domain
TRINITY_DN15996_c0_g1_i5.p2	PF14569.8	Zinc-binding RING-finger
TRINITY_DN7799_c0_g2_i1.p1	PF00072.26	Response regulator receiver domain
TRINITY_DN1349_c0_g1_i8.p2	PF08699.12	Argonaute linker 1 domain
TRINITY_DN17413_c0_g2_i1.p1	PF06884.13	Protein of unknown function (DUF1264)
TRINITY_DN23042_c0_g1_i1.p1	PF13679.8	Methyltransferase domain
TRINITY_DN2904_c0_g1_i9.p1	PF12799.9	Leucine Rich repeats (2 copies)
TRINITY_DN12730_c0_g1_i2.p1	PF13668.8	Ferritin-like domain
TRINITY_DN7832_c1_g2_i1.p1	PF16913.7	Purine nucleobase transmembrane transport
TRINITY_DN618_c0_g1_i2.p1	PF14535.8	AMP-binding enzyme C-terminal domain
TRINITY_DN7028_c0_g2_i3.p1	PF13839.8	GDSL/SGNH-like Acyl-Esterase family found in Pmr5 and Cas1p
TRINITY_DN220_c0_g2_i10.p1	PF00069.27	Protein kinase domain
TRINITY_DN8184_c0_g1_i2.p1	PF12852.9	Cupin
TRINITY_DN1888_c0_g2_i3.p3	PF02183.20	Homeobox associated leucine zipper
TRINITY_DN20685_c0_g1_i1.p1	PF13855.8	Leucine rich repeat
TRINITY_DN5439_c0_g1_i5.p1	PF07859.15	alpha/beta hydrolase fold
TRINITY_DN46760_c0_g1_i2.p1	PF12697.9	Alpha/beta hydrolase family
TRINITY_DN2904_c0_g1_i3.p1	PF13855.8	Leucine rich repeat
TRINITY_DN9782_c0_g1_i1.p1	PF14368.8	Probable lipid transfer
TRINITY_DN5137_c1_g1_i2.p1	PF00982.23	Glycosyltransferase family 20
TRINITY_DN2657_c0_g1_i1.p1	PF00248.23	Aldo/keto reductase family
TRINITY_DN464_c1_g1_i2.p1	PF03368.16	Dicer dimerisation domain
TRINITY_DN4638_c0_g1_i6.p4	PF01823.21	MAC/Perforin domain
TRINITY_DN64_c0_g1_i3.p1	PF00046.31	Homeodomain
TRINITY_DN29653_c0_g2_i1.p1	PF12977.9	Domain of Unknown Function with PDB structure (DUF3861)
TRINITY_DN2714_c0_g1_i1.p1	PF12697.9	Alpha/beta hydrolase family
TRINITY_DN6192_c0_g1_i5.p2	PF01156.21	Inosine-uridine preferring nucleoside hydrolase
TRINITY_DN14781_c0_g2_i1.p1	PF00139.21	Legume lectin domain
TRINITY_DN7285_c0_g1_i6.p1	PF16912.7	Glucose dehydrogenase C-terminus
TRINITY_DN33753_c0_g1_i1.p1	PF06723.15	MreB/Mbl protein
TRINITY_DN31508_c0_g1_i2.p1	PF03283.15	Pectinacetylesterase
TRINITY_DN5912_c0_g1_i2.p2	PF00046.31	Homeodomain
TRINITY_DN1449_c0_g1_i9.p1	PF01073.21	3-beta hydroxysteroid dehydrogenase/isomerase family
TRINITY_DN316_c0_g1_i4.p1	PF00046.31	Homeodomain
TRINITY_DN7988_c0_g2_i3.p1	PF02987.18	Late embryogenesis abundant protein
TRINITY_DN16086_c0_g1_i5.p1	PF00919.22	Uncharacterized protein family UPF0004
TRINITY_DN3256_c0_g1_i12.p1	PF00977.23	Histidine biosynthesis protein
TRINITY_DN2904_c0_g1_i10.p1	PF13516.8	Leucine Rich repeat
TRINITY_DN1679_c0_g1_i6.p1	PF07714.19	Protein tyrosine and serine/threonine kinase
TRINITY_DN8184_c0_g1_i2.p1	PF07883.13	Cupin domain
TRINITY_DN2222_c1_g2_i4.p1	PF00337.24	Galactoside-binding lectin
TRINITY_DN9458_c0_g1_i1.p1	PF00022.21	Actin
TRINITY_DN6710_c0_g1_i16.p3	PF03215.17	Rad17 P-loop domain
TRINITY_DN2966_c0_g1_i3.p1	PF06268.15	Fascin domain
TRINITY_DN280_c0_g2_i1.p1	PF12831.9	FAD dependent oxidoreductase
TRINITY_DN2888_c0_g3_i2.p1	PF12799.9	Leucine Rich repeats (2 copies)
TRINITY_DN1679_c0_g1_i1.p2	PF00069.27	Protein kinase domain
TRINITY_DN2145_c0_g1_i11.p2	PF01436.23	NHL repeat
TRINITY_DN749_c0_g1_i8.p1	PF00270.31	DEAD/DEAH box helicase
TRINITY_DN765_c1_g1_i2.p2	PF07690.18	Major Facilitator Superfamily
TRINITY_DN3434_c0_g1_i4.p1	PF12977.9	Domain of Unknown Function with PDB structure (DUF3861)
TRINITY_DN3506_c0_g2_i1.p1	PF00012.22	Hsp70 protein
TRINITY_DN6399_c0_g2_i5.p1	PF08659.12	KR domain
TRINITY_DN8261_c0_g1_i5.p1	PF00069.27	Protein kinase domain
TRINITY_DN12654_c0_g1_i3.p1	PF00954.22	S-locus glycoprotein domain
TRINITY_DN3434_c0_g1_i4.p1	PF17963.3	Bacterial Ig domain
TRINITY_DN11463_c0_g1_i4.p1	PF00646.35	F-box domain
TRINITY_DN9821_c0_g1_i1.p1	PF03479.17	Plants and Prokaryotes Conserved (PCC) domain
TRINITY_DN153_c0_g1_i4.p1	PF00010.28	Helix-loop-helix DNA-binding domain
TRINITY_DN2895_c0_g1_i9.p1	PF00069.27	Protein kinase domain
TRINITY_DN2322_c0_g1_i12.p1	PF07690.18	Major Facilitator Superfamily
TRINITY_DN7285_c0_g1_i4.p1	PF16912.7	Glucose dehydrogenase C-terminus
TRINITY_DN8261_c0_g1_i7.p1	PF20141.1	Brassinosteroid receptor island domain
TRINITY_DN10911_c0_g1_i3.p2	PF12831.9	FAD dependent oxidoreductase
TRINITY_DN7285_c0_g1_i12.p1	PF13602.8	Zinc-binding dehydrogenase
TRINITY_DN1952_c0_g1_i18.p1	PF03385.19	STELLO glycosyltransferases
TRINITY_DN7500_c0_g1_i1.p1	PF08263.14	Leucine rich repeat N-terminal domain
TRINITY_DN11463_c0_g1_i4.p1	PF12937.9	F-box-like
TRINITY_DN316_c0_g1_i2.p1	PF03789.15	ELK domain
TRINITY_DN14903_c0_g1_i1.p1	PF01073.21	3-beta hydroxysteroid dehydrogenase/isomerase family
TRINITY_DN4566_c0_g1_i3.p2	PF08449.13	UAA transporter family
TRINITY_DN1370_c0_g1_i10.p2	PF01490.20	Transmembrane amino acid transporter protein
TRINITY_DN1479_c0_g1_i7.p2	PF03571.17	Peptidase family M49
TRINITY_DN3975_c1_g1_i5.p2	PF11715.10	Nucleoporin Nup120/160
TRINITY_DN4081_c0_g1_i1.p1	PF00069.27	Protein kinase domain
TRINITY_DN4638_c0_g1_i6.p1	PF00978.23	RNA dependent RNA polymerase
TRINITY_DN56223_c0_g2_i1.p1	PF00106.27	short chain dehydrogenase
TRINITY_DN4137_c0_g1_i2.p2	PF00999.23	Sodium/hydrogen exchanger family
TRINITY_DN2904_c0_g1_i10.p1	PF07725.14	Leucine Rich Repeat
TRINITY_DN3975_c1_g1_i5.p2	PF18044.3	CCCH-type zinc finger
TRINITY_DN9467_c0_g1_i3.p1	PF03060.17	Nitronate monooxygenase
TRINITY_DN4590_c0_g1_i9.p1	PF00571.30	CBS domain
TRINITY_DN9782_c0_g1_i2.p1	PF14368.8	Probable lipid transfer
TRINITY_DN13659_c0_g1_i10.p2	PF00636.28	Ribonuclease III domain
TRINITY_DN48_c0_g1_i4.p1	PF00294.26	pfkB family carbohydrate kinase
TRINITY_DN437_c0_g1_i2.p1	PF13492.8	GAF domain
TRINITY_DN1331_c1_g1_i6.p2	PF03151.18	Triose-phosphate Transporter family
TRINITY_DN9582_c0_g2_i1.p1	PF08263.14	Leucine rich repeat N-terminal domain
TRINITY_DN1139_c0_g1_i2.p1	PF03999.14	Microtubule associated protein (MAP65/ASE1 family)
TRINITY_DN872_c1_g2_i1.p1	PF04724.15	Glycosyltransferase family 17
TRINITY_DN1289_c0_g2_i6.p3	PF16131.7	Torus domain
TRINITY_DN396_c0_g1_i15.p2	PF02309.18	AUX/IAA family
TRINITY_DN7502_c1_g1_i4.p1	PF13855.8	Leucine rich repeat
TRINITY_DN1717_c0_g1_i1.p1	PF13646.8	HEAT repeats
TRINITY_DN9782_c0_g1_i4.p1	PF14368.8	Probable lipid transfer
TRINITY_DN4788_c1_g1_i6.p1	PF00274.21	Fructose-bisphosphate aldolase class-I
TRINITY_DN1758_c0_g3_i4.p5	PF07714.19	Protein tyrosine and serine/threonine kinase
TRINITY_DN33101_c0_g1_i4.p1	PF03124.16	EXS family
TRINITY_DN8885_c0_g1_i14.p1	PF03109.18	ABC1 atypical kinase-like domain
TRINITY_DN9160_c0_g2_i1.p1	PF01637.20	ATPase domain predominantly from Archaea
TRINITY_DN1370_c0_g1_i1.p1	PF01490.20	Transmembrane amino acid transporter protein
TRINITY_DN1441_c0_g1_i6.p1	PF00847.22	AP2 domain
TRINITY_DN38399_c0_g2_i2.p1	PF02705.18	K+ potassium transporter
TRINITY_DN25954_c0_g1_i2.p1	PF01027.22	Inhibitor of apoptosis-promoting Bax1
TRINITY_DN5663_c0_g1_i7.p2	PF01565.25	FAD binding domain
TRINITY_DN1289_c0_g2_i1.p2	PF00642.26	Zinc finger C-x8-C-x5-C-x3-H type (and similar)
TRINITY_DN4187_c0_g2_i3.p2	PF02401.20	LytB protein
TRINITY_DN38355_c0_g1_i7.p1	PF17766.3	Fibronectin type-III domain
TRINITY_DN646_c0_g2_i1.p1	PF00954.22	S-locus glycoprotein domain
TRINITY_DN1086_c0_g1_i3.p2	PF13768.8	von Willebrand factor type A domain
TRINITY_DN10262_c0_g1_i7.p1	PF17005.7	WD40-like domain
TRINITY_DN4657_c0_g1_i15.p2	PF13378.8	Enolase C-terminal domain-like
TRINITY_DN5663_c0_g1_i3.p2	PF01946.19	Thi4 family
TRINITY_DN4137_c0_g1_i13.p1	PF00999.23	Sodium/hydrogen exchanger family
TRINITY_DN10249_c0_g1_i5.p1	PF02458.17	Transferase family
TRINITY_DN34078_c0_g1_i1.p1	PF02466.21	Tim17/Tim22/Tim23/Pmp24 family
TRINITY_DN6766_c0_g1_i4.p1	PF00226.33	DnaJ domain
TRINITY_DN1218_c0_g1_i5.p1	PF07859.15	alpha/beta hydrolase fold
TRINITY_DN14015_c0_g1_i5.p1	PF12590.10	Acyl-ATP thioesterase
TRINITY_DN4945_c0_g1_i12.p3	PF14215.8	bHLH-MYC and R2R3-MYB transcription factors N-terminal
TRINITY_DN8279_c0_g1_i1.p1	PF03224.16	V-ATPase subunit H
TRINITY_DN9390_c0_g1_i7.p1	PF06427.13	UDP-glucose:Glycoprotein Glucosyltransferase
TRINITY_DN215_c0_g1_i3.p1	PF00135.30	Carboxylesterase family
TRINITY_DN3434_c0_g1_i3.p1	PF06234.14	Toluene-4-monooxygenase system protein B (TmoB)
TRINITY_DN8261_c0_g1_i7.p1	PF08263.14	Leucine rich repeat N-terminal domain
TRINITY_DN35312_c1_g1_i3.p2	PF14226.8	non-haem dioxygenase in morphine synthesis N-terminal
TRINITY_DN24195_c0_g1_i13.p1	PF13960.8	Domain of unknown function (DUF4218)
TRINITY_DN2714_c0_g1_i2.p1	PF12740.9	Chlorophyllase enzyme
TRINITY_DN8885_c0_g1_i14.p1	PF00069.27	Protein kinase domain
TRINITY_DN11896_c0_g1_i2.p1	PF04842.14	Plant protein of unknown function (DUF639)
TRINITY_DN2567_c0_g1_i18.p2	PF00122.22	E1-E2 ATPase
TRINITY_DN8240_c0_g1_i3.p1	PF02383.20	SacI homology domain
TRINITY_DN38766_c0_g1_i1.p1	PF12799.9	Leucine Rich repeats (2 copies)
TRINITY_DN23214_c0_g1_i1.p1	PF13671.8	AAA domain
TRINITY_DN1476_c0_g3_i1.p1	PF06723.15	MreB/Mbl protein
TRINITY_DN2778_c0_g1_i3.p1	PF18444.3	RNA recognition motif
TRINITY_DN464_c1_g1_i1.p2	PF12212.10	PAZ domain
TRINITY_DN2398_c0_g1_i13.p2	PF02260.22	FATC domain
TRINITY_DN1370_c0_g1_i5.p1	PF01490.20	Transmembrane amino acid transporter protein
TRINITY_DN58961_c0_g1_i1.p1	PF00069.27	Protein kinase domain
TRINITY_DN34814_c0_g1_i2.p1	PF08030.14	Ferric reductase NAD binding domain
TRINITY_DN15023_c0_g1_i3.p1	PF13738.8	Pyridine nucleotide-disulphide oxidoreductase
TRINITY_DN35933_c0_g1_i9.p1	PF00046.31	Homeodomain
TRINITY_DN7500_c0_g1_i1.p1	PF07725.14	Leucine Rich Repeat
TRINITY_DN33101_c0_g1_i8.p1	PF03105.21	SPX domain
TRINITY_DN770_c1_g1_i3.p2	PF00447.19	HSF-type DNA-binding
TRINITY_DN19492_c0_g2_i2.p1	PF13249.8	Squalene-hopene cyclase N-terminal domain
TRINITY_DN22_c1_g1_i4.p1	PF05637.14	galactosyl transferase GMA12/MNN10 family
TRINITY_DN14750_c1_g1_i1.p1	PF07725.14	Leucine Rich Repeat
TRINITY_DN8328_c0_g1_i1.p1	PF00230.22	Major intrinsic protein
TRINITY_DN1851_c0_g3_i2.p1	PF06723.15	MreB/Mbl protein
TRINITY_DN464_c1_g1_i1.p1	PF12212.10	PAZ domain
TRINITY_DN1321_c0_g1_i2.p1	PF00153.29	Mitochondrial carrier protein
TRINITY_DN3256_c0_g1_i7.p1	PF14244.8	gag-polypeptide of LTR copia-type
TRINITY_DN7963_c0_g1_i2.p1	PF01277.19	Oleosin
TRINITY_DN62114_c0_g1_i3.p1	PF00174.21	Oxidoreductase molybdopterin binding domain
TRINITY_DN2398_c0_g1_i13.p1	PF02259.25	FAT domain
TRINITY_DN15996_c0_g1_i5.p2	PF03552.16	Cellulose synthase
TRINITY_DN464_c1_g1_i8.p1	PF14622.8	Ribonuclease-III-like
TRINITY_DN739_c0_g1_i5.p1	PF14531.8	Kinase-like
TRINITY_DN90_c0_g4_i10.p1	PF01373.19	Glycosyl hydrolase family 14
TRINITY_DN3999_c1_g1_i1.p1	PF12848.9	ABC transporter
TRINITY_DN4360_c0_g1_i14.p1	PF01554.20	MatE
TRINITY_DN5663_c0_g1_i13.p4	PF13738.8	Pyridine nucleotide-disulphide oxidoreductase
TRINITY_DN14659_c0_g1_i1.p1	PF14532.8	Sigma-54 interaction domain
TRINITY_DN5970_c0_g1_i7.p2	PF05922.18	Peptidase inhibitor I9
TRINITY_DN8498_c0_g1_i1.p1	PF00930.23	Dipeptidyl peptidase IV (DPP IV) N-terminal region
TRINITY_DN1196_c0_g1_i5.p1	PF13692.8	Glycosyl transferases group 1
TRINITY_DN15023_c0_g1_i4.p1	PF12831.9	FAD dependent oxidoreductase
TRINITY_DN4923_c0_g1_i7.p1	PF01699.26	Sodium/calcium exchanger protein
TRINITY_DN10359_c0_g1_i1.p1	PF01738.20	Dienelactone hydrolase family
TRINITY_DN5226_c0_g1_i10.p1	PF18345.3	Zinc finger domain
TRINITY_DN4371_c1_g1_i4.p2	PF03398.16	Regulator of Vps4 activity in the MVB pathway
TRINITY_DN5849_c0_g1_i3.p1	PF03110.16	SBP domain
TRINITY_DN9429_c0_g1_i5.p1	PF03828.21	Cid1 family poly A polymerase
TRINITY_DN1086_c0_g1_i1.p1	PF13768.8	von Willebrand factor type A domain
TRINITY_DN1139_c3_g1_i1.p1	PF08263.14	Leucine rich repeat N-terminal domain
TRINITY_DN1679_c0_g1_i5.p1	PF07714.19	Protein tyrosine and serine/threonine kinase
TRINITY_DN9828_c0_g2_i1.p1	PF00501.30	AMP-binding enzyme
TRINITY_DN33872_c0_g1_i2.p1	PF00141.25	Peroxidase
TRINITY_DN2516_c0_g1_i2.p1	PF02987.18	Late embryogenesis abundant protein
TRINITY_DN5380_c0_g1_i1.p1	PF00982.23	Glycosyltransferase family 20
TRINITY_DN5682_c0_g2_i4.p1	PF13921.8	Myb-like DNA-binding domain
TRINITY_DN4590_c0_g1_i5.p1	PF01595.22	Cyclin M transmembrane N-terminal domain
TRINITY_DN2398_c0_g1_i13.p2	PF08771.13	FKBP12-rapamycin binding domain
TRINITY_DN3325_c0_g1_i1.p2	PF01301.21	Glycosyl hydrolases family 35
TRINITY_DN4638_c0_g1_i16.p3	PF01823.21	MAC/Perforin domain
TRINITY_DN8794_c0_g1_i17.p2	PF07969.13	Amidohydrolase family
TRINITY_DN4216_c1_g1_i7.p1	PF00011.23	Hsp20/alpha crystallin family
TRINITY_DN6135_c0_g1_i17.p1	PF00632.27	HECT-domain (ubiquitin-transferase)
TRINITY_DN1503_c1_g2_i3.p1	PF06723.15	MreB/Mbl protein
TRINITY_DN18246_c0_g1_i1.p1	PF13855.8	Leucine rich repeat
TRINITY_DN13659_c0_g1_i2.p1	PF00270.31	DEAD/DEAH box helicase
TRINITY_DN1227_c0_g2_i6.p1	PF18428.3	BRCA1 C Terminus (BRCT) domain
TRINITY_DN8834_c0_g2_i1.p1	PF03015.21	Male sterility protein
TRINITY_DN80661_c0_g1_i3.p1	PF00403.28	Heavy-metal-associated domain
TRINITY_DN7500_c0_g1_i1.p1	PF13855.8	Leucine rich repeat
TRINITY_DN5663_c0_g1_i7.p1	PF13738.8	Pyridine nucleotide-disulphide oxidoreductase
TRINITY_DN7285_c0_g1_i7.p1	PF08240.14	Alcohol dehydrogenase GroES-like domain
TRINITY_DN27438_c0_g1_i15.p1	PF11069.10	Cilia- and flagella-associated protein 298
TRINITY_DN74739_c0_g1_i1.p1	PF13857.8	Ankyrin repeats (many copies)
TRINITY_DN16078_c0_g1_i7.p1	PF14547.8	Hydrophobic seed protein
TRINITY_DN11940_c0_g1_i2.p1	PF05920.13	Homeobox KN domain
TRINITY_DN13659_c0_g1_i2.p1	PF13625.8	Helicase conserved C-terminal domain
TRINITY_DN4123_c0_g1_i10.p1	PF14815.8	NUDIX domain
TRINITY_DN25_c1_g3_i1.p1	PF00083.26	Sugar (and other) transporter
TRINITY_DN6710_c0_g1_i14.p4	PF03215.17	Rad17 P-loop domain
TRINITY_DN464_c1_g1_i2.p1	PF00035.28	Double-stranded RNA binding motif
TRINITY_DN464_c3_g2_i9.p1	PF12212.10	PAZ domain
TRINITY_DN2336_c0_g1_i2.p1	PF00122.22	E1-E2 ATPase
TRINITY_DN464_c1_g1_i1.p1	PF00035.28	Double-stranded RNA binding motif
TRINITY_DN1001_c0_g1_i9.p1	PF01370.23	NAD dependent epimerase/dehydratase family
TRINITY_DN24195_c0_g1_i13.p1	PF13963.8	Transposase-associated domain
TRINITY_DN6399_c0_g2_i11.p1	PF00106.27	short chain dehydrogenase
TRINITY_DN13659_c0_g1_i10.p1	PF03368.16	Dicer dimerisation domain
TRINITY_DN8462_c0_g1_i1.p1	PF00027.31	Cyclic nucleotide-binding domain
TRINITY_DN3240_c0_g1_i8.p2	PF02365.17	No apical meristem (NAM) protein
TRINITY_DN30059_c0_g1_i3.p1	PF00012.22	Hsp70 protein
TRINITY_DN5439_c0_g1_i7.p1	PF07859.15	alpha/beta hydrolase fold
TRINITY_DN10262_c0_g1_i7.p1	PF12894.9	Anaphase-promoting complex subunit 4 WD40 domain
TRINITY_DN1647_c0_g1_i9.p2	PF02365.17	No apical meristem (NAM) protein
TRINITY_DN9921_c0_g1_i2.p2	PF13041.8	PPR repeat family
TRINITY_DN1851_c0_g2_i7.p1	PF06723.15	MreB/Mbl protein
TRINITY_DN2657_c0_g1_i11.p1	PF00248.23	Aldo/keto reductase family
TRINITY_DN8834_c0_g2_i1.p1	PF01073.21	3-beta hydroxysteroid dehydrogenase/isomerase family
TRINITY_DN6910_c0_g2_i8.p2	PF05142.14	Domain of unknown function (DUF702)
TRINITY_DN9467_c0_g1_i5.p1	PF01070.20	FMN-dependent dehydrogenase
TRINITY_DN2567_c0_g1_i2.p1	PF00122.22	E1-E2 ATPase
TRINITY_DN1139_c3_g1_i6.p1	PF13516.8	Leucine Rich repeat
TRINITY_DN1996_c0_g1_i12.p2	PF03398.16	Regulator of Vps4 activity in the MVB pathway
TRINITY_DN8834_c0_g2_i1.p1	PF01370.23	NAD dependent epimerase/dehydratase family
TRINITY_DN7502_c1_g1_i11.p1	PF12799.9	Leucine Rich repeats (2 copies)
TRINITY_DN31508_c0_g1_i6.p1	PF03283.15	Pectinacetylesterase
TRINITY_DN121609_c0_g1_i1.p1	PF04043.17	Plant invertase/pectin methylesterase inhibitor
TRINITY_DN2888_c0_g3_i2.p1	PF13855.8	Leucine rich repeat
TRINITY_DN13659_c0_g1_i10.p1	PF13625.8	Helicase conserved C-terminal domain
TRINITY_DN6053_c0_g1_i2.p2	PF13606.8	Ankyrin repeat
TRINITY_DN820_c0_g1_i10.p1	PF02301.20	HORMA domain
TRINITY_DN5302_c0_g2_i1.p2	PF07725.14	Leucine Rich Repeat
TRINITY_DN6099_c0_g1_i3.p1	PF13371.8	Tetratricopeptide repeat
TRINITY_DN2967_c0_g2_i2.p1	PF04427.20	Brix domain
TRINITY_DN12352_c0_g3_i5.p1	PF00447.19	HSF-type DNA-binding
TRINITY_DN3506_c0_g2_i1.p1	PF06723.15	MreB/Mbl protein
TRINITY_DN8466_c1_g1_i5.p1	PF00332.20	Glycosyl hydrolases family 17
TRINITY_DN9261_c0_g1_i2.p1	PF00641.20	Zn-finger in Ran binding protein and others
TRINITY_DN626_c0_g2_i6.p1	PF10533.11	Plant zinc cluster domain
TRINITY_DN16086_c0_g1_i12.p1	PF04055.23	Radical SAM superfamily
TRINITY_DN9001_c0_g1_i3.p1	PF10248.11	Myelodysplasia-myeloid leukemia factor 1-interacting protein
TRINITY_DN4317_c0_g1_i5.p1	PF00183.20	Hsp90 protein
TRINITY_DN464_c3_g2_i9.p1	PF13625.8	Helicase conserved C-terminal domain
TRINITY_DN3240_c0_g1_i8.p1	PF04755.14	PAP_fibrillin
TRINITY_DN15023_c0_g1_i4.p1	PF13450.8	NAD(P)-binding Rossmann-like domain
TRINITY_DN1452_c0_g1_i19.p1	PF08659.12	KR domain
TRINITY_DN4401_c0_g3_i2.p1	PF07716.17	Basic region leucine zipper
TRINITY_DN15023_c0_g1_i4.p1	PF04898.16	Glutamate synthase central domain
TRINITY_DN475_c0_g2_i1.p1	PF01370.23	NAD dependent epimerase/dehydratase family
TRINITY_DN464_c1_g1_i3.p2	PF14622.8	Ribonuclease-III-like
TRINITY_DN1139_c3_g1_i6.p1	PF12799.9	Leucine Rich repeats (2 copies)
TRINITY_DN2657_c0_g1_i17.p1	PF00248.23	Aldo/keto reductase family
TRINITY_DN6486_c0_g1_i4.p1	PF01274.24	Malate synthase
TRINITY_DN9961_c0_g1_i3.p2	PF00067.24	Cytochrome P450
TRINITY_DN2904_c0_g1_i4.p1	PF00069.27	Protein kinase domain
TRINITY_DN11506_c0_g1_i2.p1	PF13873.8	Myb/SANT-like DNA-binding domain
TRINITY_DN10227_c0_g1_i16.p1	PF00614.24	Phospholipase D Active site motif
TRINITY_DN23_c1_g1_i1.p1	PF00012.22	Hsp70 protein
TRINITY_DN3434_c0_g1_i4.p1	PF01599.21	Ribosomal protein S27a
TRINITY_DN6884_c0_g1_i15.p1	PF18253.3	Hsp70-interacting protein N N-terminal domain
TRINITY_DN24452_c0_g1_i1.p1	PF06732.13	Pescadillo N-terminus
TRINITY_DN3434_c0_g1_i4.p1	PF13019.8	Silencing defective 2 N-terminal ubiquitin domain
TRINITY_DN820_c0_g1_i21.p1	PF02301.20	HORMA domain
TRINITY_DN4638_c0_g1_i8.p3	PF01823.21	MAC/Perforin domain
TRINITY_DN5463_c1_g1_i1.p1	PF00155.23	Aminotransferase class I and II
TRINITY_DN5849_c0_g1_i2.p1	PF03110.16	SBP domain
TRINITY_DN2664_c0_g2_i2.p1	PF07714.19	Protein tyrosine and serine/threonine kinase
TRINITY_DN8498_c0_g1_i1.p1	PF07676.14	WD40-like Beta Propeller Repeat
TRINITY_DN7843_c0_g1_i8.p1	PF16113.7	Enoyl-CoA hydratase/isomerase
TRINITY_DN47_c0_g2_i1.p1	PF00122.22	E1-E2 ATPase
TRINITY_DN25694_c0_g1_i6.p1	PF13347.8	MFS/sugar transport protein
TRINITY_DN5204_c0_g1_i1.p1	PF00069.27	Protein kinase domain
TRINITY_DN25694_c0_g1_i9.p1	PF07690.18	Major Facilitator Superfamily
TRINITY_DN38212_c0_g1_i6.p1	PF14531.8	Kinase-like
TRINITY_DN66197_c0_g1_i3.p1	PF00847.22	AP2 domain
TRINITY_DN7348_c0_g1_i5.p1	PF08777.13	RNA binding motif
TRINITY_DN5497_c0_g1_i3.p1	PF04145.17	Ctr copper transporter family
TRINITY_DN749_c0_g1_i6.p1	PF07717.18	Oligonucleotide/oligosaccharide-binding (OB)-fold
TRINITY_DN6468_c0_g1_i1.p1	PF12799.9	Leucine Rich repeats (2 copies)
TRINITY_DN7285_c0_g1_i14.p1	PF16912.7	Glucose dehydrogenase C-terminus
TRINITY_DN6884_c0_g1_i15.p1	PF14595.8	Thioredoxin
TRINITY_DN3434_c0_g1_i3.p1	PF13840.8	ACT domain
TRINITY_DN12654_c0_g1_i3.p1	PF00069.27	Protein kinase domain
TRINITY_DN16086_c0_g1_i6.p1	PF04055.23	Radical SAM superfamily
TRINITY_DN5663_c0_g1_i4.p1	PF01565.25	FAD binding domain
TRINITY_DN4255_c2_g1_i3.p1	PF05142.14	Domain of unknown function (DUF702)
TRINITY_DN903_c0_g1_i9.p1	PF00072.26	Response regulator receiver domain
TRINITY_DN4453_c0_g1_i5.p1	PF13414.8	TPR repeat
TRINITY_DN20002_c0_g1_i2.p1	PF02365.17	No apical meristem (NAM) protein
TRINITY_DN13659_c0_g1_i13.p2	PF00636.28	Ribonuclease III domain
TRINITY_DN5465_c0_g1_i2.p2	PF00764.21	Arginosuccinate synthase
TRINITY_DN7278_c0_g1_i7.p1	PF07859.15	alpha/beta hydrolase fold
TRINITY_DN13383_c0_g1_i4.p1	PF00646.35	F-box domain
TRINITY_DN314_c0_g1_i6.p3	PF05834.14	Lycopene cyclase protein
TRINITY_DN46128_c0_g1_i4.p1	PF06723.15	MreB/Mbl protein
TRINITY_DN5204_c0_g1_i1.p1	PF08263.14	Leucine rich repeat N-terminal domain
TRINITY_DN4571_c0_g3_i1.p3	PF03330.20	Lytic transglycolase
TRINITY_DN1578_c1_g1_i5.p1	PF01027.22	Inhibitor of apoptosis-promoting Bax1
TRINITY_DN4061_c0_g1_i3.p1	PF00899.23	ThiF family
TRINITY_DN11456_c1_g1_i1.p1	PF00067.24	Cytochrome P450
TRINITY_DN739_c0_g1_i1.p1	PF07714.19	Protein tyrosine and serine/threonine kinase
TRINITY_DN2916_c1_g1_i4.p1	PF05887.13	Procyclic acidic repetitive protein (PARP)
TRINITY_DN4137_c0_g1_i8.p2	PF00027.31	Cyclic nucleotide-binding domain
TRINITY_DN10227_c0_g1_i1.p2	PF12357.10	Phospholipase D C terminal
TRINITY_DN7488_c0_g1_i2.p1	PF13855.8	Leucine rich repeat
TRINITY_DN2720_c0_g1_i6.p2	PF02567.18	Phenazine biosynthesis-like protein
TRINITY_DN5912_c0_g1_i6.p1	PF07526.13	Associated with HOX
TRINITY_DN1713_c0_g1_i6.p1	PF14389.8	Leucine-zipper of ternary complex factor MIP1
TRINITY_DN1321_c0_g1_i3.p1	PF08240.14	Alcohol dehydrogenase GroES-like domain
TRINITY_DN13659_c0_g1_i13.p2	PF03368.16	Dicer dimerisation domain
TRINITY_DN31880_c0_g1_i2.p1	PF08063.14	PADR1 (NUC008) domain
TRINITY_DN5027_c1_g1_i3.p1	PF00432.23	Prenyltransferase and squalene oxidase repeat
TRINITY_DN23_c0_g1_i2.p1	PF06723.15	MreB/Mbl protein
TRINITY_DN8885_c0_g1_i3.p1	PF03109.18	ABC1 atypical kinase-like domain
TRINITY_DN396_c0_g1_i14.p1	PF00847.22	AP2 domain
TRINITY_DN765_c1_g1_i5.p1	PF07690.18	Major Facilitator Superfamily
TRINITY_DN1578_c1_g1_i2.p1	PF01027.22	Inhibitor of apoptosis-promoting Bax1
TRINITY_DN4445_c0_g3_i1.p1	PF14299.8	Phloem protein 2
TRINITY_DN2714_c0_g1_i4.p1	PF12740.9	Chlorophyllase enzyme
TRINITY_DN4590_c0_g1_i16.p1	PF00571.30	CBS domain
TRINITY_DN8261_c0_g1_i7.p1	PF00069.27	Protein kinase domain
TRINITY_DN1370_c0_g1_i10.p1	PF01490.20	Transmembrane amino acid transporter protein
TRINITY_DN6449_c0_g1_i6.p1	PF13555.8	P-loop containing region of AAA domain
TRINITY_DN16086_c0_g1_i20.p1	PF00919.22	Uncharacterized protein family UPF0004
TRINITY_DN1218_c0_g1_i2.p1	PF10294.11	Lysine methyltransferase
TRINITY_DN5912_c0_g1_i6.p1	PF00046.31	Homeodomain
TRINITY_DN4638_c0_g1_i10.p2	PF01823.21	MAC/Perforin domain
TRINITY_DN2665_c0_g1_i6.p1	PF01453.26	D-mannose binding lectin
TRINITY_DN4638_c0_g2_i3.p1	PF01823.21	MAC/Perforin domain
TRINITY_DN123507_c0_g1_i1.p1	PF18444.3	RNA recognition motif
TRINITY_DN26823_c0_g1_i3.p1	PF00450.24	Serine carboxypeptidase
TRINITY_DN2620_c0_g3_i7.p1	PF00106.27	short chain dehydrogenase
TRINITY_DN2648_c0_g2_i2.p1	PF00012.22	Hsp70 protein
TRINITY_DN4638_c0_g1_i9.p1	PF00978.23	RNA dependent RNA polymerase
TRINITY_DN11674_c0_g1_i1.p1	PF00183.20	Hsp90 protein
TRINITY_DN4590_c0_g1_i2.p1	PF01595.22	Cyclin M transmembrane N-terminal domain
TRINITY_DN6609_c1_g2_i1.p1	PF00067.24	Cytochrome P450
TRINITY_DN3772_c0_g1_i6.p1	PF08659.12	KR domain
TRINITY_DN1944_c0_g1_i11.p1	PF03732.19	Retrotransposon gag protein
TRINITY_DN3058_c0_g1_i2.p1	PF14368.8	Probable lipid transfer
TRINITY_DN7285_c0_g1_i16.p1	PF16912.7	Glucose dehydrogenase C-terminus
TRINITY_DN1679_c0_g1_i10.p1	PF07714.19	Protein tyrosine and serine/threonine kinase
TRINITY_DN749_c0_g1_i8.p1	PF00575.25	S1 RNA binding domain
TRINITY_DN5353_c0_g1_i1.p1	PF00072.26	Response regulator receiver domain
TRINITY_DN3999_c1_g1_i1.p1	PF13671.8	AAA domain
TRINITY_DN464_c1_g1_i2.p1	PF14622.8	Ribonuclease-III-like
TRINITY_DN31880_c0_g1_i4.p1	PF00644.22	Poly(ADP-ribose) polymerase catalytic domain
TRINITY_DN6778_c1_g1_i2.p1	PF06414.14	Zeta toxin
TRINITY_DN6766_c0_g1_i3.p1	PF00226.33	DnaJ domain
TRINITY_DN33753_c0_g1_i1.p1	PF00012.22	Hsp70 protein
TRINITY_DN26823_c0_g1_i4.p1	PF00450.24	Serine carboxypeptidase
TRINITY_DN215_c0_g1_i2.p1	PF00135.30	Carboxylesterase family
TRINITY_DN11240_c0_g1_i5.p1	PF13672.8	Protein phosphatase 2C
TRINITY_DN2657_c0_g1_i2.p1	PF00248.23	Aldo/keto reductase family
TRINITY_DN9582_c0_g2_i1.p1	PF07725.14	Leucine Rich Repeat
TRINITY_DN4638_c0_g1_i11.p2	PF01823.21	MAC/Perforin domain
TRINITY_DN10049_c0_g1_i3.p1	PF02657.17	Fe-S metabolism associated domain
TRINITY_DN1713_c0_g1_i3.p1	PF14389.8	Leucine-zipper of ternary complex factor MIP1
TRINITY_DN6884_c0_g1_i8.p1	PF13414.8	TPR repeat
TRINITY_DN1952_c0_g1_i7.p1	PF03385.19	STELLO glycosyltransferases
TRINITY_DN10039_c0_g1_i1.p1	PF12894.9	Anaphase-promoting complex subunit 4 WD40 domain
TRINITY_DN14087_c0_g1_i2.p2	PF06694.13	Plant nuclear matrix protein 1 (NMP1)
TRINITY_DN25552_c0_g1_i2.p1	PF13555.8	P-loop containing region of AAA domain
TRINITY_DN9961_c0_g1_i8.p1	PF00067.24	Cytochrome P450
TRINITY_DN227_c0_g1_i3.p2	PF13855.8	Leucine rich repeat
TRINITY_DN3772_c0_g1_i6.p2	PF13561.8	Enoyl-(Acyl carrier protein) reductase
TRINITY_DN6449_c0_g1_i14.p2	PF13555.8	P-loop containing region of AAA domain
TRINITY_DN6449_c0_g1_i2.p2	PF12848.9	ABC transporter
TRINITY_DN666_c0_g2_i2.p1	PF00931.24	NB-ARC domain
TRINITY_DN2318_c0_g2_i1.p1	PF14703.8	Cytosolic domain of 10TM putative phosphate transporter
TRINITY_DN6449_c0_g1_i2.p2	PF02463.21	RecF/RecN/SMC N terminal domain
TRINITY_DN8885_c0_g1_i3.p1	PF00069.27	Protein kinase domain
TRINITY_DN9160_c0_g2_i1.p1	PF07726.13	ATPase family associated with various cellular activities (AAA)
TRINITY_DN3772_c0_g1_i6.p2	PF08659.12	KR domain
TRINITY_DN8885_c0_g1_i13.p1	PF07714.19	Protein tyrosine and serine/threonine kinase
TRINITY_DN739_c0_g1_i1.p1	PF14531.8	Kinase-like
TRINITY_DN1370_c0_g1_i9.p2	PF01490.20	Transmembrane amino acid transporter protein
TRINITY_DN9467_c0_g1_i6.p3	PF03060.17	Nitronate monooxygenase
TRINITY_DN4109_c0_g3_i1.p1	PF12799.9	Leucine Rich repeats (2 copies)
TRINITY_DN637_c0_g1_i2.p1	PF07847.14	PCO_ADO
TRINITY_DN7488_c0_g1_i10.p1	PF08263.14	Leucine rich repeat N-terminal domain
TRINITY_DN1679_c0_g1_i8.p1	PF00069.27	Protein kinase domain
TRINITY_DN475_c0_g2_i5.p1	PF01370.23	NAD dependent epimerase/dehydratase family
TRINITY_DN18928_c0_g1_i9.p1	PF00067.24	Cytochrome P450
TRINITY_DN2678_c0_g1_i3.p1	PF00800.20	Prephenate dehydratase
TRINITY_DN2322_c0_g1_i12.p1	PF00083.26	Sugar (and other) transporter
TRINITY_DN4123_c0_g1_i16.p1	PF14815.8	NUDIX domain
TRINITY_DN6778_c1_g1_i2.p1	PF07724.16	AAA domain (Cdc48 subfamily)
TRINITY_DN2714_c0_g1_i8.p1	PF12740.9	Chlorophyllase enzyme
TRINITY_DN8242_c0_g1_i8.p1	PF00012.22	Hsp70 protein
TRINITY_DN4638_c0_g1_i7.p5	PF01823.21	MAC/Perforin domain
TRINITY_DN1224_c0_g1_i2.p1	PF08031.14	Berberine and berberine like
TRINITY_DN14015_c0_g1_i10.p1	PF01643.19	Acyl-ACP thioesterase
TRINITY_DN6131_c0_g1_i3.p1	PF06415.15	BPG-independent PGAM N-terminus (iPGM_N)
TRINITY_DN4625_c0_g1_i9.p1	PF13661.8	2OG-Fe(II) oxygenase superfamily
TRINITY_DN5143_c0_g1_i3.p1	PF05621.13	Bacterial TniB protein
TRINITY_DN12720_c1_g1_i3.p1	PF04783.14	Protein of unknown function (DUF630)
TRINITY_DN227_c0_g1_i3.p2	PF08263.14	Leucine rich repeat N-terminal domain
TRINITY_DN9467_c0_g1_i7.p1	PF03060.17	Nitronate monooxygenase
TRINITY_DN33078_c0_g1_i4.p1	PF03004.16	Plant transposase (Ptta/En/Spm family)
TRINITY_DN3405_c0_g2_i2.p1	PF00847.22	AP2 domain
TRINITY_DN1325_c0_g1_i10.p2	PF00580.23	UvrD/REP helicase N-terminal domain
TRINITY_DN906_c0_g1_i4.p1	PF10551.11	MULE transposase domain
TRINITY_DN123507_c0_g1_i1.p1	PF08777.13	RNA binding motif
TRINITY_DN26710_c0_g2_i1.p1	PF00462.26	Glutaredoxin
TRINITY_DN33101_c0_g1_i11.p1	PF03105.21	SPX domain
TRINITY_DN12125_c0_g1_i3.p1	PF16866.7	PHD-finger
TRINITY_DN14082_c0_g1_i13.p1	PF00450.24	Serine carboxypeptidase
TRINITY_DN13580_c1_g1_i2.p1	PF05498.13	Rapid ALkalinization Factor (RALF)
TRINITY_DN6710_c0_g1_i16.p3	PF13555.8	P-loop containing region of AAA domain
TRINITY_DN20685_c0_g1_i1.p1	PF00069.27	Protein kinase domain
TRINITY_DN194_c1_g1_i4.p1	PF08777.13	RNA binding motif
TRINITY_DN2904_c0_g1_i9.p1	PF08263.14	Leucine rich repeat N-terminal domain
TRINITY_DN16086_c0_g1_i18.p1	PF04055.23	Radical SAM superfamily
TRINITY_DN6567_c0_g1_i1.p1	PF13639.8	Ring finger domain
TRINITY_DN58961_c0_g1_i1.p1	PF12799.9	Leucine Rich repeats (2 copies)
TRINITY_DN1370_c0_g1_i6.p1	PF01490.20	Transmembrane amino acid transporter protein
TRINITY_DN9390_c0_g1_i7.p1	PF01020.19	Ribosomal L40e family
TRINITY_DN2648_c0_g1_i2.p1	PF06723.15	MreB/Mbl protein
TRINITY_DN2904_c0_g1_i4.p1	PF12799.9	Leucine Rich repeats (2 copies)
TRINITY_DN6778_c1_g1_i2.p1	PF13671.8	AAA domain
TRINITY_DN3240_c0_g1_i4.p1	PF04755.14	PAP_fibrillin
TRINITY_DN16331_c0_g2_i5.p1	PF11573.10	Mediator complex subunit 23
TRINITY_DN2620_c0_g3_i4.p1	PF00106.27	short chain dehydrogenase
TRINITY_DN3471_c0_g1_i4.p1	PF00646.35	F-box domain
TRINITY_DN6399_c0_g2_i6.p1	PF13561.8	Enoyl-(Acyl carrier protein) reductase
TRINITY_DN90_c0_g4_i6.p1	PF01373.19	Glycosyl hydrolase family 14
TRINITY_DN13383_c0_g1_i4.p1	PF12937.9	F-box-like
TRINITY_DN33629_c0_g1_i2.p1	PF02458.17	Transferase family
TRINITY_DN8602_c0_g1_i1.p1	PF00155.23	Aminotransferase class I and II
TRINITY_DN51554_c0_g1_i1.p1	PF07725.14	Leucine Rich Repeat
TRINITY_DN749_c0_g1_i8.p1	PF04408.25	Helicase associated domain (HA2)
TRINITY_DN7856_c0_g1_i2.p1	PF00722.23	Glycosyl hydrolases family 16
TRINITY_DN2663_c1_g1_i1.p2	PF13921.8	Myb-like DNA-binding domain
TRINITY_DN15119_c0_g1_i4.p1	PF13423.8	Ubiquitin carboxyl-terminal hydrolase
TRINITY_DN2663_c1_g1_i3.p1	PF13873.8	Myb/SANT-like DNA-binding domain
TRINITY_DN5143_c0_g1_i3.p1	PF07724.16	AAA domain (Cdc48 subfamily)
TRINITY_DN13659_c0_g1_i12.p1	PF00035.28	Double-stranded RNA binding motif
TRINITY_DN5465_c0_g1_i3.p2	PF00764.21	Arginosuccinate synthase
TRINITY_DN194_c1_g1_i4.p1	PF18444.3	RNA recognition motif
TRINITY_DN35933_c0_g1_i5.p1	PF02183.20	Homeobox associated leucine zipper
TRINITY_DN35933_c0_g1_i7.p1	PF00046.31	Homeodomain
TRINITY_DN10565_c0_g2_i5.p1	PF00464.21	Serine hydroxymethyltransferase
TRINITY_DN820_c0_g1_i25.p1	PF02301.20	HORMA domain
TRINITY_DN5663_c0_g1_i6.p1	PF01565.25	FAD binding domain
TRINITY_DN9217_c0_g2_i1.p1	PF13921.8	Myb-like DNA-binding domain
TRINITY_DN5204_c0_g1_i2.p1	PF00069.27	Protein kinase domain
TRINITY_DN15023_c0_g1_i3.p1	PF13450.8	NAD(P)-binding Rossmann-like domain
TRINITY_DN3524_c0_g1_i5.p1	PF03106.17	WRKY DNA -binding domain
TRINITY_DN9390_c0_g1_i7.p1	PF18396.3	TANK binding kinase 1 ubiquitin-like domain
TRINITY_DN25_c1_g3_i1.p1	PF06609.15	Fungal trichothecene efflux pump (TRI12)
TRINITY_DN10039_c0_g1_i2.p1	PF12894.9	Anaphase-promoting complex subunit 4 WD40 domain
TRINITY_DN5970_c0_g1_i31.p3	PF05922.18	Peptidase inhibitor I9
TRINITY_DN9390_c0_g1_i7.p1	PF17963.3	Bacterial Ig domain
TRINITY_DN1308_c0_g1_i3.p1	PF04003.14	Dip2/Utp12 Family
TRINITY_DN1944_c0_g1_i11.p1	PF19259.1	Ty3 transposon capsid-like protein
TRINITY_DN5293_c0_g3_i4.p1	PF06454.13	Protein of unknown function (DUF1084)
TRINITY_DN4317_c0_g1_i7.p1	PF00183.20	Hsp90 protein
TRINITY_DN7502_c1_g1_i11.p1	PF08263.14	Leucine rich repeat N-terminal domain
TRINITY_DN5226_c0_g1_i4.p1	PF18345.3	Zinc finger domain
TRINITY_DN35933_c0_g1_i7.p1	PF02183.20	Homeobox associated leucine zipper
TRINITY_DN12885_c0_g1_i2.p1	PF13921.8	Myb-like DNA-binding domain
TRINITY_DN1952_c0_g1_i5.p1	PF03385.19	STELLO glycosyltransferases
TRINITY_DN1963_c0_g2_i2.p1	PF00403.28	Heavy-metal-associated domain
TRINITY_DN33078_c0_g1_i4.p1	PF13952.8	Domain of unknown function (DUF4216)
TRINITY_DN16086_c0_g1_i9.p3	PF00919.22	Uncharacterized protein family UPF0004
TRINITY_DN3772_c0_g1_i1.p1	PF13561.8	Enoyl-(Acyl carrier protein) reductase
TRINITY_DN60160_c0_g1_i1.p1	PF01453.26	D-mannose binding lectin
TRINITY_DN38556_c0_g2_i3.p1	PF01746.23	tRNA (Guanine-1)-methyltransferase
TRINITY_DN2648_c0_g2_i1.p1	PF06723.15	MreB/Mbl protein
TRINITY_DN2396_c0_g1_i4.p1	PF03479.17	Plants and Prokaryotes Conserved (PCC) domain
TRINITY_DN7502_c1_g1_i4.p1	PF08263.14	Leucine rich repeat N-terminal domain
TRINITY_DN31880_c0_g1_i2.p1	PF05406.17	WGR domain
TRINITY_DN4590_c0_g1_i1.p1	PF00571.30	CBS domain
TRINITY_DN1289_c0_g2_i1.p2	PF16131.7	Torus domain
TRINITY_DN26823_c0_g1_i5.p1	PF00450.24	Serine carboxypeptidase
TRINITY_DN5334_c0_g2_i5.p1	PF00069.27	Protein kinase domain
TRINITY_DN2516_c0_g1_i3.p1	PF02987.18	Late embryogenesis abundant protein
TRINITY_DN4405_c0_g1_i3.p1	PF00117.30	Glutamine amidotransferase class-I
TRINITY_DN31880_c0_g1_i4.p1	PF05406.17	WGR domain
TRINITY_DN55960_c0_g2_i1.p1	PF13921.8	Myb-like DNA-binding domain
TRINITY_DN6456_c2_g2_i2.p1	PF03479.17	Plants and Prokaryotes Conserved (PCC) domain
TRINITY_DN64_c0_g1_i1.p1	PF00046.31	Homeodomain
TRINITY_DN316_c0_g1_i2.p1	PF00046.31	Homeodomain
TRINITY_DN3772_c0_g1_i4.p2	PF00106.27	short chain dehydrogenase
TRINITY_DN66197_c0_g1_i1.p1	PF00847.22	AP2 domain
TRINITY_DN6884_c0_g1_i8.p1	PF18253.3	Hsp70-interacting protein N N-terminal domain
TRINITY_DN8466_c1_g1_i9.p1	PF00332.20	Glycosyl hydrolases family 17
TRINITY_DN12178_c0_g1_i2.p1	PF01212.23	Beta-eliminating lyase
TRINITY_DN2663_c1_g1_i1.p2	PF13873.8	Myb/SANT-like DNA-binding domain
TRINITY_DN7285_c0_g1_i5.p1	PF13602.8	Zinc-binding dehydrogenase
TRINITY_DN5465_c0_g1_i1.p1	PF00764.21	Arginosuccinate synthase
TRINITY_DN26472_c1_g1_i3.p1	PF03195.16	Lateral organ boundaries (LOB) domain
TRINITY_DN7471_c0_g1_i3.p1	PF12457.10	Tuftelin interacting protein N terminal
TRINITY_DN2665_c0_g1_i1.p1	PF01453.26	D-mannose binding lectin
TRINITY_DN9234_c0_g1_i5.p1	PF05142.14	Domain of unknown function (DUF702)
TRINITY_DN3198_c0_g1_i1.p1	PF06427.13	UDP-glucose:Glycoprotein Glucosyltransferase
TRINITY_DN5564_c0_g1_i7.p3	PF00650.22	CRAL/TRIO domain
TRINITY_DN1441_c0_g1_i26.p1	PF00847.22	AP2 domain
TRINITY_DN81656_c0_g1_i18.p1	PF11721.10	Malectin domain
TRINITY_DN5078_c0_g2_i3.p1	PF03127.16	GAT domain
TRINITY_DN10398_c0_g1_i2.p1	PF01575.21	MaoC like domain
TRINITY_DN5663_c0_g1_i13.p4	PF12831.9	FAD dependent oxidoreductase
TRINITY_DN7488_c0_g1_i2.p1	PF12799.9	Leucine Rich repeats (2 copies)
TRINITY_DN2916_c1_g1_i4.p1	PF00412.24	LIM domain
TRINITY_DN5380_c0_g1_i1.p1	PF02358.18	Trehalose-phosphatase
TRINITY_DN6244_c0_g1_i10.p1	PF13466.8	STAS domain
TRINITY_DN80661_c0_g1_i5.p1	PF00403.28	Heavy-metal-associated domain
TRINITY_DN626_c0_g2_i3.p1	PF10533.11	Plant zinc cluster domain
TRINITY_DN16834_c0_g1_i2.p1	PF02458.17	Transferase family
TRINITY_DN7929_c0_g2_i6.p2	PF07714.19	Protein tyrosine and serine/threonine kinase
TRINITY_DN749_c0_g1_i8.p1	PF13625.8	Helicase conserved C-terminal domain
TRINITY_DN4638_c0_g1_i8.p1	PF00978.23	RNA dependent RNA polymerase
TRINITY_DN2398_c0_g1_i13.p2	PF13513.8	HEAT-like repeat
TRINITY_DN3471_c0_g1_i2.p1	PF12937.9	F-box-like
TRINITY_DN14750_c1_g1_i2.p1	PF12799.9	Leucine Rich repeats (2 copies)
TRINITY_DN52563_c0_g1_i1.p1	PF00450.24	Serine carboxypeptidase
TRINITY_DN19545_c0_g1_i2.p1	PF04525.14	LURP-one-related
TRINITY_DN56223_c0_g2_i1.p1	PF13561.8	Enoyl-(Acyl carrier protein) reductase
TRINITY_DN6399_c0_g2_i9.p1	PF08659.12	KR domain
TRINITY_DN6399_c0_g2_i10.p1	PF13561.8	Enoyl-(Acyl carrier protein) reductase
TRINITY_DN10359_c0_g1_i3.p1	PF01738.20	Dienelactone hydrolase family
TRINITY_DN6884_c0_g1_i13.p1	PF13414.8	TPR repeat
TRINITY_DN13659_c0_g1_i2.p1	PF03368.16	Dicer dimerisation domain
TRINITY_DN19492_c0_g2_i2.p1	PF13243.8	Squalene-hopene cyclase C-terminal domain
TRINITY_DN11240_c0_g1_i1.p1	PF13672.8	Protein phosphatase 2C
TRINITY_DN23989_c1_g1_i1.p1	PF13632.8	Glycosyl transferase family group 2
TRINITY_DN25126_c0_g2_i2.p1	PF00080.22	Copper/zinc superoxide dismutase (SODC)
TRINITY_DN1325_c0_g1_i10.p2	PF13671.8	AAA domain
TRINITY_DN21019_c0_g1_i4.p2	PF02365.17	No apical meristem (NAM) protein
TRINITY_DN7471_c0_g1_i2.p1	PF12656.9	G-patch domain
TRINITY_DN304_c0_g1_i2.p2	PF07571.15	TAF6 C-terminal HEAT repeat domain
TRINITY_DN6778_c1_g1_i2.p1	PF13191.8	AAA ATPase domain
TRINITY_DN3524_c0_g1_i12.p1	PF03106.17	WRKY DNA -binding domain
TRINITY_DN7502_c1_g1_i4.p1	PF12799.9	Leucine Rich repeats (2 copies)
TRINITY_DN11748_c0_g1_i4.p1	PF05739.21	SNARE domain
TRINITY_DN29270_c1_g4_i1.p1	PF01490.20	Transmembrane amino acid transporter protein
TRINITY_DN304_c0_g1_i5.p2	PF00125.26	Core histone H2A/H2B/H3/H4
TRINITY_DN1264_c0_g1_i3.p1	PF04859.14	Plant protein of unknown function (DUF641)
TRINITY_DN464_c1_g1_i3.p2	PF00270.31	DEAD/DEAH box helicase
TRINITY_DN5682_c0_g1_i3.p2	PF13921.8	Myb-like DNA-binding domain
TRINITY_DN2888_c0_g3_i2.p1	PF07714.19	Protein tyrosine and serine/threonine kinase
TRINITY_DN4566_c0_g1_i2.p1	PF00892.22	EamA-like transporter family
TRINITY_DN9748_c0_g1_i6.p1	PF08659.12	KR domain
TRINITY_DN7202_c0_g1_i12.p1	PF16421.7	E2F transcription factor CC-MB domain
TRINITY_DN8462_c0_g1_i2.p1	PF00520.33	Ion transport protein
TRINITY_DN1851_c0_g1_i1.p1	PF06723.15	MreB/Mbl protein
TRINITY_DN4788_c1_g1_i13.p1	PF00274.21	Fructose-bisphosphate aldolase class-I
TRINITY_DN20685_c0_g1_i2.p1	PF07725.14	Leucine Rich Repeat
TRINITY_DN3772_c0_g1_i1.p1	PF08659.12	KR domain
TRINITY_DN46369_c0_g1_i3.p1	PF03737.17	Aldolase/RraA
TRINITY_DN6020_c0_g3_i4.p2	PF02330.18	Mitochondrial glycoprotein
TRINITY_DN4482_c0_g1_i12.p1	PF00582.28	Universal stress protein family
TRINITY_DN1151_c0_g1_i3.p1	PF07714.19	Protein tyrosine and serine/threonine kinase
TRINITY_DN23989_c1_g1_i1.p1	PF03552.16	Cellulose synthase
TRINITY_DN7285_c0_g1_i2.p1	PF13602.8	Zinc-binding dehydrogenase
TRINITY_DN3198_c0_g1_i1.p1	PF00240.25	Ubiquitin family
TRINITY_DN7929_c0_g2_i1.p2	PF00069.27	Protein kinase domain
TRINITY_DN3772_c0_g1_i5.p1	PF00106.27	short chain dehydrogenase
TRINITY_DN5694_c0_g1_i5.p1	PF00234.24	Protease inhibitor/seed storage/LTP family
TRINITY_DN227_c0_g1_i3.p2	PF12799.9	Leucine Rich repeats (2 copies)
TRINITY_DN6449_c0_g1_i14.p2	PF02463.21	RecF/RecN/SMC N terminal domain
TRINITY_DN4405_c0_g1_i3.p1	PF01174.21	SNO glutamine amidotransferase family
TRINITY_DN18246_c0_g1_i2.p1	PF08263.14	Leucine rich repeat N-terminal domain
TRINITY_DN9390_c0_g1_i7.p1	PF02821.18	Staphylokinase/Streptokinase family
TRINITY_DN2904_c0_g1_i2.p1	PF13855.8	Leucine rich repeat
TRINITY_DN6567_c0_g1_i3.p1	PF12678.9	RING-H2 zinc finger domain
TRINITY_DN6468_c0_g1_i1.p1	PF13516.8	Leucine Rich repeat
TRINITY_DN10359_c0_g1_i1.p1	PF12697.9	Alpha/beta hydrolase family
TRINITY_DN31880_c0_g1_i4.p1	PF18428.3	BRCA1 C Terminus (BRCT) domain
TRINITY_DN17143_c0_g3_i10.p1	PF13625.8	Helicase conserved C-terminal domain
TRINITY_DN749_c0_g1_i6.p1	PF00575.25	S1 RNA binding domain
TRINITY_DN9860_c1_g2_i1.p1	PF00343.22	Carbohydrate phosphorylase
TRINITY_DN2665_c0_g1_i6.p1	PF00954.22	S-locus glycoprotein domain
TRINITY_DN28374_c0_g1_i2.p1	PF13561.8	Enoyl-(Acyl carrier protein) reductase
TRINITY_DN6449_c0_g1_i2.p2	PF13555.8	P-loop containing region of AAA domain
TRINITY_DN38766_c0_g1_i1.p1	PF08263.14	Leucine rich repeat N-terminal domain
TRINITY_DN14659_c0_g1_i1.p1	PF13191.8	AAA ATPase domain
TRINITY_DN6449_c0_g1_i2.p2	PF13748.8	ABC transporter transmembrane region
TRINITY_DN1289_c0_g2_i7.p1	PF03405.16	Fatty acid desaturase
TRINITY_DN2648_c0_g2_i3.p1	PF00012.22	Hsp70 protein
TRINITY_DN2657_c0_g1_i11.p2	PF00248.23	Aldo/keto reductase family
TRINITY_DN31927_c0_g2_i1.p1	PF00847.22	AP2 domain
TRINITY_DN8794_c0_g1_i6.p2	PF07969.13	Amidohydrolase family
TRINITY_DN3193_c0_g1_i5.p1	PF13378.8	Enolase C-terminal domain-like
TRINITY_DN23042_c0_g1_i1.p1	PF14570.8	RING/Ubox like zinc-binding domain
TRINITY_DN54406_c0_g1_i1.p1	PF04852.14	Protein of unknown function (DUF640)
TRINITY_DN150_c0_g1_i3.p1	PF13625.8	Helicase conserved C-terminal domain
TRINITY_DN975_c0_g1_i5.p1	PF00046.31	Homeodomain
TRINITY_DN5008_c0_g1_i2.p1	PF00244.22	14-3-3 protein
TRINITY_DN9467_c0_g1_i3.p3	PF03060.17	Nitronate monooxygenase
TRINITY_DN7843_c0_g2_i3.p1	PF16113.7	Enoyl-CoA hydratase/isomerase
TRINITY_DN7799_c0_g2_i1.p1	PF00512.27	His Kinase A (phospho-acceptor) domain
TRINITY_DN6449_c0_g1_i2.p1	PF02463.21	RecF/RecN/SMC N terminal domain
TRINITY_DN6449_c0_g1_i6.p1	PF13748.8	ABC transporter transmembrane region
TRINITY_DN3434_c0_g1_i3.p1	PF06149.14	Protein of unknown function (DUF969)
TRINITY_DN8602_c0_g1_i8.p1	PF00155.23	Aminotransferase class I and II
TRINITY_DN666_c0_g2_i1.p1	PF13855.8	Leucine rich repeat
TRINITY_DN8794_c0_g1_i11.p2	PF07969.13	Amidohydrolase family
TRINITY_DN7140_c0_g2_i3.p1	PF00860.22	Permease family
TRINITY_DN464_c1_g1_i1.p1	PF00636.28	Ribonuclease III domain
TRINITY_DN7794_c0_g1_i5.p2	PF03715.15	Noc2p family
TRINITY_DN6884_c0_g1_i14.p1	PF13414.8	TPR repeat
TRINITY_DN33872_c0_g1_i1.p1	PF00141.25	Peroxidase
TRINITY_DN3564_c0_g1_i5.p1	PF03619.18	Organic solute transporter Ostalpha
TRINITY_DN1370_c0_g1_i9.p1	PF01490.20	Transmembrane amino acid transporter protein
TRINITY_DN5143_c0_g1_i3.p1	PF14532.8	Sigma-54 interaction domain
TRINITY_DN38212_c0_g1_i6.p1	PF00627.33	UBA/TS-N domain
TRINITY_DN27438_c0_g1_i15.p1	PF17963.3	Bacterial Ig domain
TRINITY_DN6485_c0_g1_i2.p1	PF13840.8	ACT domain
TRINITY_DN464_c1_g1_i8.p1	PF13625.8	Helicase conserved C-terminal domain
TRINITY_DN4453_c0_g1_i5.p1	PF17830.3	STI1 domain
TRINITY_DN754_c0_g1_i8.p1	PF03000.16	NPH3 family
TRINITY_DN4137_c0_g1_i14.p2	PF00999.23	Sodium/hydrogen exchanger family
TRINITY_DN749_c0_g1_i6.p1	PF00270.31	DEAD/DEAH box helicase
TRINITY_DN171_c0_g1_i2.p1	PF14374.8	60S ribosomal protein L4 C-terminal domain
TRINITY_DN63657_c0_g1_i1.p1	PF12799.9	Leucine Rich repeats (2 copies)
TRINITY_DN7057_c0_g1_i2.p1	PF09751.11	Nuclear protein Es2
TRINITY_DN7285_c0_g1_i5.p1	PF08240.14	Alcohol dehydrogenase GroES-like domain
TRINITY_DN1321_c0_g1_i1.p1	PF13602.8	Zinc-binding dehydrogenase
TRINITY_DN15493_c0_g4_i1.p1	PF04083.18	Partial alpha/beta-hydrolase lipase region
TRINITY_DN1370_c0_g1_i11.p2	PF01490.20	Transmembrane amino acid transporter protein
TRINITY_DN9467_c0_g1_i4.p3	PF03060.17	Nitronate monooxygenase
TRINITY_DN4638_c0_g1_i6.p2	PF01823.21	MAC/Perforin domain
TRINITY_DN9467_c0_g1_i6.p1	PF03060.17	Nitronate monooxygenase
TRINITY_DN3198_c0_g1_i2.p1	PF18579.3	Rubisco accumulation factor 1 helix turn helix domain
TRINITY_DN11207_c0_g1_i3.p1	PF00538.21	linker histone H1 and H5 family
TRINITY_DN9582_c0_g2_i1.p1	PF13855.8	Leucine rich repeat
TRINITY_DN1452_c0_g1_i19.p1	PF00106.27	short chain dehydrogenase
TRINITY_DN6449_c0_g1_i14.p1	PF13555.8	P-loop containing region of AAA domain
TRINITY_DN10227_c0_g1_i9.p1	PF13918.8	PLD-like domain
TRINITY_DN464_c1_g1_i8.p1	PF00636.28	Ribonuclease III domain
TRINITY_DN8261_c0_g1_i5.p1	PF08263.14	Leucine rich repeat N-terminal domain
TRINITY_DN2648_c0_g1_i1.p1	PF00012.22	Hsp70 protein
TRINITY_DN9734_c0_g1_i3.p1	PF01536.18	Adenosylmethionine decarboxylase
TRINITY_DN3256_c0_g1_i9.p2	PF01070.20	FMN-dependent dehydrogenase
TRINITY_DN1321_c0_g1_i3.p1	PF13602.8	Zinc-binding dehydrogenase
TRINITY_DN2663_c1_g1_i3.p1	PF13921.8	Myb-like DNA-binding domain
TRINITY_DN3198_c0_g1_i1.p1	PF18037.3	Ubiquitin-like domain
TRINITY_DN3765_c0_g1_i2.p1	PF00856.30	SET domain
TRINITY_DN4123_c0_g1_i3.p1	PF14815.8	NUDIX domain
TRINITY_DN3198_c0_g1_i1.p1	PF12977.9	Domain of Unknown Function with PDB structure (DUF3861)
TRINITY_DN464_c1_g1_i1.p2	PF03368.16	Dicer dimerisation domain
TRINITY_DN6778_c1_g1_i2.p1	PF01637.20	ATPase domain predominantly from Archaea
TRINITY_DN38355_c0_g1_i3.p1	PF17766.3	Fibronectin type-III domain
TRINITY_DN2904_c0_g1_i10.p1	PF07714.19	Protein tyrosine and serine/threonine kinase
TRINITY_DN8885_c0_g1_i10.p1	PF07714.19	Protein tyrosine and serine/threonine kinase
TRINITY_DN1722_c1_g1_i1.p3	PF00789.22	UBX domain
TRINITY_DN6567_c0_g1_i2.p1	PF12678.9	RING-H2 zinc finger domain
TRINITY_DN2664_c0_g2_i2.p1	PF00069.27	Protein kinase domain
TRINITY_DN5663_c0_g1_i6.p1	PF13738.8	Pyridine nucleotide-disulphide oxidoreductase
TRINITY_DN8466_c1_g1_i2.p1	PF00332.20	Glycosyl hydrolases family 17
TRINITY_DN177637_c0_g1_i1.p1	PF09358.12	Ubiquitin fold domain
TRINITY_DN4109_c0_g3_i2.p1	PF00646.35	F-box domain
TRINITY_DN215_c0_g1_i1.p1	PF07859.15	alpha/beta hydrolase fold
TRINITY_DN5663_c0_g1_i4.p1	PF13738.8	Pyridine nucleotide-disulphide oxidoreductase
TRINITY_DN13659_c0_g1_i2.p1	PF00636.28	Ribonuclease III domain
TRINITY_DN14004_c0_g1_i1.p1	PF01734.24	Patatin-like phospholipase
TRINITY_DN475_c0_g2_i5.p1	PF00106.27	short chain dehydrogenase
TRINITY_DN2516_c1_g1_i8.p2	PF13602.8	Zinc-binding dehydrogenase
TRINITY_DN4235_c0_g1_i1.p1	PF02987.18	Late embryogenesis abundant protein
TRINITY_DN18889_c0_g1_i1.p1	PF00571.30	CBS domain
TRINITY_DN1224_c0_g1_i2.p1	PF01565.25	FAD binding domain
TRINITY_DN48_c0_g1_i3.p1	PF00294.26	pfkB family carbohydrate kinase
TRINITY_DN31880_c0_g1_i5.p1	PF05406.17	WGR domain
TRINITY_DN3161_c0_g1_i5.p2	PF13839.8	GDSL/SGNH-like Acyl-Esterase family found in Pmr5 and Cas1p
TRINITY_DN9390_c0_g1_i7.p1	PF13840.8	ACT domain
TRINITY_DN1151_c0_g1_i6.p1	PF00069.27	Protein kinase domain
TRINITY_DN1349_c0_g1_i8.p2	PF16486.7	N-terminal domain of argonaute
TRINITY_DN2398_c0_g1_i13.p1	PF02260.22	FATC domain
TRINITY_DN27438_c0_g1_i15.p1	PF04359.16	Protein of unknown function (DUF493)
TRINITY_DN3015_c0_g4_i3.p1	PF01636.25	Phosphotransferase enzyme family
TRINITY_DN2657_c0_g1_i14.p1	PF00248.23	Aldo/keto reductase family
TRINITY_DN3193_c0_g1_i3.p1	PF13378.8	Enolase C-terminal domain-like
TRINITY_DN7824_c1_g1_i2.p1	PF03106.17	WRKY DNA -binding domain
TRINITY_DN16086_c0_g1_i12.p1	PF00919.22	Uncharacterized protein family UPF0004
TRINITY_DN18246_c0_g1_i1.p1	PF07725.14	Leucine Rich Repeat
TRINITY_DN5143_c0_g1_i3.p1	PF01695.19	IstB-like ATP binding protein
TRINITY_DN464_c3_g2_i9.p1	PF00636.28	Ribonuclease III domain
[truncated: 1,299 more rows]

## Sheet: Table S7
Table S7. Rhizome up-regulated gene expression
	Leaf-A	Leaf-B	Leaf-C	Rhizome-A	Rhizome-B	Rhizome-C	Stem-A	Stem-B	Stem-C
LcSAO1	25	11	19	291	343	138	36	12	36
LcSAO2	34	24	27	110	82	94	41	23	17
LcSAO3	77	153	153	369	330	575	141	164	153
LcSAO4	11	13	8	78	64	57	21	29	14

## Sheet: Table S8
Table S8. The accession numbers of DOXB family proteins for phylogenetic analysis.
Species	Accesions	Source	Gene name
Apium graveolens	Ag3G00826.1	ASM990537v1 - Genome - Assembly - NCBI (nih.gov)	–
Apium graveolens	Ag3G02081.1	ASM990537v1 - Genome - Assembly - NCBI (nih.gov)	–
Apium graveolens	Ag4G00838.1	ASM990537v1 - Genome - Assembly - NCBI (nih.gov)	–
Apium graveolens	Ag4G01849.1	ASM990537v1 - Genome - Assembly - NCBI (nih.gov)	–
Apium graveolens	Ag5G00318.1	ASM990537v1 - Genome - Assembly - NCBI (nih.gov)	–
Apium graveolens	Ag5G02468.1	ASM990537v1 - Genome - Assembly - NCBI (nih.gov)	–
Apium graveolens	Ag6G01841.1	ASM990537v1 - Genome - Assembly - NCBI (nih.gov)	–
Apium graveolens	Ag8G01676.1	ASM990537v1 - Genome - Assembly - NCBI (nih.gov)	–
Apium graveolens	Ag9G00725.1	ASM990537v1 - Genome - Assembly - NCBI (nih.gov)	–
Angelica sinensis	AS03G02221-RA	https://data.cyverse.org/dav-anon/iplant/home/licheng_caas/Angelica.sinensis_genome/	–
Angelica sinensis	AS04G01265-RA	https://data.cyverse.org/dav-anon/iplant/home/licheng_caas/Angelica.sinensis_genome/	–
Angelica sinensis	AS04G02128-RA	https://data.cyverse.org/dav-anon/iplant/home/licheng_caas/Angelica.sinensis_genome/	–
Angelica sinensis	AS04G02298-RA	https://data.cyverse.org/dav-anon/iplant/home/licheng_caas/Angelica.sinensis_genome/	–
Angelica sinensis	AS05G01017-RA	https://data.cyverse.org/dav-anon/iplant/home/licheng_caas/Angelica.sinensis_genome/	–
Angelica sinensis	AS05G02907-RA	https://data.cyverse.org/dav-anon/iplant/home/licheng_caas/Angelica.sinensis_genome/	–
Angelica sinensis	AS06G00612-RA	https://data.cyverse.org/dav-anon/iplant/home/licheng_caas/Angelica.sinensis_genome/	–
Angelica sinensis	AS07G01900-RA	https://data.cyverse.org/dav-anon/iplant/home/licheng_caas/Angelica.sinensis_genome/	–
Angelica sinensis	AS07G03031-RA	https://data.cyverse.org/dav-anon/iplant/home/licheng_caas/Angelica.sinensis_genome/	–
Angelica sinensis	AS08G02297-RA	https://data.cyverse.org/dav-anon/iplant/home/licheng_caas/Angelica.sinensis_genome/	–
Bupleurum chinense	BC01G001137.mRNA1	https://www.bupleurumgenome.com/	–
Bupleurum chinense	BC01G002021.mRNA1	https://www.bupleurumgenome.com/	–
Bupleurum chinense	BC01G002029.mRNA1	https://www.bupleurumgenome.com/	–
Bupleurum chinense	BC02G003997.mRNA1	https://www.bupleurumgenome.com/	–
Bupleurum chinense	BC03G003162.mRNA1	https://www.bupleurumgenome.com/	–
Bupleurum chinense	BC03G003504.mRNA1	https://www.bupleurumgenome.com/	–
Bupleurum chinense	BC03G005809.mRNA1	https://www.bupleurumgenome.com/	–
Bupleurum chinense	BC03G005810.mRNA1	https://www.bupleurumgenome.com/	–
Bupleurum chinense	BC06G001189.mRNA1	https://www.bupleurumgenome.com/	–
Bupleurum chinense	BC06G004758.mRNA1	https://www.bupleurumgenome.com/	–
Coriandrum sativum	Cs01G02167.1	CGDB:Home (bio2db.com)	–
Coriandrum sativum	Cs03G00480.1	CGDB:Home (bio2db.com)	–
Coriandrum sativum	Cs03G02497.1	CGDB:Home (bio2db.com)	–
Coriandrum sativum	Cs03G02498.1	CGDB:Home (bio2db.com)	–
Coriandrum sativum	Cs05G01957.1	CGDB:Home (bio2db.com)	–
Coriandrum sativum	Cs06G02461.1	CGDB:Home (bio2db.com)	–
Coriandrum sativum	Cs07G02967.1	CGDB:Home (bio2db.com)	–
Coriandrum sativum	Cs08G01152.1	CGDB:Home (bio2db.com)	–
Coriandrum sativum	Cs09G01394.1	CGDB:Home (bio2db.com)	–
Coriandrum sativum	Cs09G04685.1	CGDB:Home (bio2db.com)	–
Coriandrum sativum	Cs09G04827.1	CGDB:Home (bio2db.com)	–
Coriandrum sativum	Cs10G01237.1	CGDB:Home (bio2db.com)	–
Coriandrum sativum	CsUnG00813.1	CGDB:Home (bio2db.com)	–
Coriandrum sativum	CsUnG02259.1	CGDB:Home (bio2db.com)	–
Daucus carota	DCAR 3740	ASM162521v1 - Genome - Assembly - NCBI (nih.gov)	–
Daucus carota	DCAR 6718	ASM162521v1 - Genome - Assembly - NCBI (nih.gov)	–
Daucus carota	DCAR 9376	ASM162521v1 - Genome - Assembly - NCBI (nih.gov)	–
Daucus carota	DCAR 9511	ASM162521v1 - Genome - Assembly - NCBI (nih.gov)	–
Daucus carota	DCAR 11173	ASM162521v1 - Genome - Assembly - NCBI (nih.gov)	–
Daucus carota	DCAR 11580	ASM162521v1 - Genome - Assembly - NCBI (nih.gov)	–
Daucus carota	DCAR 13969	ASM162521v1 - Genome - Assembly - NCBI (nih.gov)	–
Daucus carota	DCAR 16608	ASM162521v1 - Genome - Assembly - NCBI (nih.gov)	–
Daucus carota	DCAR 23280	ASM162521v1 - Genome - Assembly - NCBI (nih.gov)	–
Daucus carota	DCAR 25776	ASM162521v1 - Genome - Assembly - NCBI (nih.gov)	–
Daucus carota	DCAR 27125	ASM162521v1 - Genome - Assembly - NCBI (nih.gov)	–
Daucus carota	DCAR 27311	ASM162521v1 - Genome - Assembly - NCBI (nih.gov)	–
Oryza sativa	LOC_Os02g58070.1	Phytozome info: O.sativa v7.0 (doe.gov)	–
Oryza sativa	LOC_Os03g06990.1	Phytozome info: O.sativa v7.0 (doe.gov)	–
Oryza sativa	LOC_Os03g07000.1	Phytozome info: O.sativa v7.0 (doe.gov)	–
Oryza sativa	LOC_Os03g55380.1	Phytozome info: O.sativa v7.0 (doe.gov)	–
Oryza sativa	LOC_Os03g58880.1	Phytozome info: O.sativa v7.0 (doe.gov)	–
Oryza sativa	LOC_Os03g58890.2	Phytozome info: O.sativa v7.0 (doe.gov)	–
Oryza sativa	LOC_Os04g27850.1	Phytozome info: O.sativa v7.0 (doe.gov)	–
Oryza sativa	LOC_Os05g41010.1	Phytozome info: O.sativa v7.0 (doe.gov)	–
Oryza sativa	LOC_Os07g09630.1	Phytozome info: O.sativa v7.0 (doe.gov)	–
Oryza sativa	LOC_Os10g27340.2	Phytozome info: O.sativa v7.0 (doe.gov)	–
Oryza sativa	LOC_Os10g35470.1	Phytozome info: O.sativa v7.0 (doe.gov)	–
Arabidopsis thaliana	Q9ZW86	Swiss-Prot	P4H1
Arabidopsis thaliana	F4JZ24	Swiss-Prot	P4H10
Arabidopsis thaliana	Q9SZT0	Swiss-Prot	P4H11
Arabidopsis thaliana	Q8GXT7	Swiss-Prot	P4H12
Arabidopsis thaliana	F4ILF8	Swiss-Prot	P4H13
Arabidopsis thaliana	F4JAU3	Swiss-Prot	P4H2
Arabidopsis thaliana	Q9LN20	Swiss-Prot	P4H3
Arabidopsis thaliana	Q8LAN3	Swiss-Prot	P4H4
Arabidopsis thaliana	Q24JN5	Swiss-Prot	P4H5
Arabidopsis thaliana	F4J0A8	Swiss-Prot	P4H6
Arabidopsis thaliana	Q8L970	Swiss-Prot	P4H7
Arabidopsis thaliana	F4JNU8	Swiss-Prot	P4H8
Arabidopsis thaliana	Q8VZJ7	Swiss-Prot	P4H9
Bos taurus	Q1RMU3	Swiss-Prot	P4HA1
Caenorhabditis elegans	Q10576	Swiss-Prot	P4HA1
Gallus gallus	P16924	Swiss-Prot	P4HA1
Homo sapiens	P13674	Swiss-Prot	P4HA1
Homo sapiens	O15460	Swiss-Prot	–
Mus musculus	Q60715	Swiss-Prot	P4HA1
Pongo abelii	Q5RAG8	Swiss-Prot	P4HA1
Rattus norvegicus	P54001	Swiss-Prot	P4HA1
Caenorhabditis elegans	Q20065	Swiss-Prot	P4HA2
Gallus gallus	Q5ZLK5	Swiss-Prot	P4HA2
Mus musculus	Q60716	Swiss-Prot	P4HA2
Bos taurus	Q75UG4	Swiss-Prot	P4HA3
Homo sapiens	Q7Z4N8	Swiss-Prot	P4HA3
Mus musculus	Q6W3F0	Swiss-Prot	P4HA3
Rattus norvegicus	Q6W3E9	Swiss-Prot	P4HA3
Ligusticum chuanxiong	TRINITY_DN15010_c1_g1_i1.p1	This study	–
Ligusticum chuanxiong	TRINITY_DN1697_c0_g1_i6.p1	This study	–
Ligusticum chuanxiong	TRINITY_DN40884_c0_g1_i1.p1	This study	–
Ligusticum chuanxiong	TRINITY_DN597_c2_g1_i2.p1	This study	–
Ligusticum chuanxiong	TRINITY_DN8848_c0_g1_i5.p1	This study	–
Ligusticum chuanxiong	TRINITY_DN8848_c0_g1_i5.p2	This study	Lc2OGD5

## Sheet: Table S9
	Table S9. The conservation analysis of amino acids
	Amino acid	Position	PSSM			Variants
			WT	A	Conservation
	R	29	6	-4	√	R29A
	Y	70	10	-6	√	Y70A
	Y	76	9	-1	√	Y76A
	H	79	10	-5	√	H79A
	R	95	8	-5	√	R95A
	T	98	8	-3	√	T98A
	E	111	8	-5	√	E111A
	T	112	7	-4	√	T112A
	F	149	9	-6	√	F149A
	S	176	6	-1	√	S176A
	T	178	7	-1	√	T178A

## Sheet: Table S10
Table S10. Relative conversion rates of Wild-type (WT) LcSAO1 and mutants
WT	R29A	Y70A	Y76A	H79A	R95A	T98A	E111A	T112A	F149A	S176A	T178A
0.601108	0	0.380684	0	0.390195	0.576032	0	0	0.610618	0	0	0
0.896536	0	0.040275	0.093453	0	0	0	0	0	0	0	0
0.460729	0.315432	0.327751	0.200012	0.030491	0.020055	0.124744	0.183095	0.127528	0.334894	0.06101	0.0792498

[truncated: 2 more sheets: Table S11, Table S12]
